# Supplementary material for: Mitochondrial respiration atlas reveals differential changes in mitochondrial function across sex and age
Source: eLife. 2024 Dec 20;13:RP96926. doi: 10.7554/eLife.96926 (PMC11661797; doi:10.7554/eLife.96926)
Supplement: Figure 1—source data 2. [file elife-96926-fig1-data2.xlsx]

## Sheet: Young-BAT
SMAPLE INFORMATION:	All data from Seahorse Machine:		Time (minutes)	NADH-YMBT1			Succ/Rot-YMBT1			NADH-YMBT2			Succ/Rot-YMBT2			NADH-YMBT3			Succ/Rot-YMBT3			NADH-YMBT4			Succ/Rot-YMBT4			NADH-YMBT5			Succ/Rot-YMBT5			NADH-YMBT6			Succ/Rot-YMBT6			NADH-YMBT7			Succ/Rot-YMBT7			NADH-YMBT8			Succ/Rot-YMBT8
Tissue: Brown Adipose Tissue (BAT)			1.30951	12.5484	4.35783	4.28451	-6.26493	5.47791	14.7742	0.666688	0.039673	-1.60073	7.21551	-1.18425	5.43219	3.2148	-1.93455	-2.06833	1.73793	5.51286	1.41923	-4.52526	15.8203	3.82112	12.0138	-0.318892	11.1414	2.86757	-6.70378	-2.14583	14.6819	5.29058	8.38633	10.8822	4.91702	3.60135	-3.19248	13.47	-0.550161	8.40457	14.1228	1.90067	-2.40208	4.99804	5.29809	6.62691	8.8646	2.67414	6.53223
Tissue prep: Frozen			5.75478	10.4195	6.58329	7.15222	-3.62526	6.52291	16.4117	0.829114	2.76092	1.10863	9.47818	5.67424	6.59345	5.92312	-4.81613	3.06631	-0.418459	8.10711	-4.04247	-4.6963	20.0636	4.64723	9.64576	14.324	11.9251	3.53976	-4.2712	0.384176	18.6965	9.06446	10.1328	8.05458	9.23771	5.9602	0.454723	18.0945	2.12619	11.9349	6.31364	-4.4884	1.95471	5.47537	2.52132	8.98716	10.7612	1.28472	9.42664
Both sides, enitre depot			10.1948	7.17728	4.77525	8.76835	-1.95101	6.79442	12.2856	0.728257	12.8222	2.62195	8.72958	5.15758	6.08235	4.10931	-5.01845	2.65664	-0.260111	7.69983	-6.30616	-4.08817	19.4939	5.63464	7.39729	13.2905	11.538	3.1787	-1.78552	2.26699	19.2149	13.569	9.41295	5.63336	8.78478	3.9143	1.01715	16.3852	2.42239	7.16227	-2.56727	-2.10762	3.65327	6.6537	2.94875	9.8036	9.17698	2.01742	8.85392
2 mL 1X MAS used			14.725	83.2156	79.2201	75.5366	128.068	139.83	143.873	53.8886	66.2566	50.0193	141.212	149.48	139.294	91.1774	94.9343	102.343	172.717	187.667	178.971	82.886	108.209	98.7498	166.706	176.548	163.525	106.951	104.656	102.288	154.872	144.38	142.849	42.8443	61.7349	43.4741	84.8958	98.8129	77.4215	95.8645	77.8821	80.4919	192.869	186.353	178.475	39.7111	41.9402	37.8571	97.236
7 ml homogenizer used			19.1682	73.5242	71.5442	67.3327	124.71	135.048	138.65	50.2699	61.3905	44.691	139.724	148.178	136.971	81.2132	83.7679	89.2843	159.297	183.688	177.647	68.1907	94.799	86.291	162.51	170.472	156.668	91.9569	90.1647	87.2892	151.645	140.505	136.675	39.2187	57.2761	37.9935	87.6917	93.0771	80.6915	83.6185	68.9221	71.2301	187.113	182.789	164.859	37.1656	32.968	30.0003	97.7131
Sex: male and female			23.6072	65.4	63.1418	59.7296	111.78	126.1	127.637	44.9063	54.1725	38.6274	128.709	138.959	127.363	80.4217	71.6705	79.0269	132.136	170.041	165.82	57.7729	83.2116	74.6748	149.331	157.185	144.131	78.9924	75.9437	76.0206	138.563	128.546	124.17	35.2565	50.1386	33.4486	83.3364	85.7873	76.5264	73.3289	55.0773	62.1889	170.892	169.196	148.916	33.4891	27.3182	25.2198	93.5901
Strain: C57BL/6J			28.1345	0.184148	-1.46481	6.86793	-3.04965	-0.92348	5.58121	17.7699	16.1495	-3.05755	4.95126	0.743712	2.06402	-4.95218	-11.9883	-1.84995	-1.0452	8.48337	-6.16688	7.77388	9.45449	3.62917	-0.778414	0.566253	2.57328	1.16284	2.45958	-1.18383	20.1249	0.101836	4.2185	-2.9292	9.63268	-0.196215	-0.918029	32.1513	-1.2741	6.33955	4.5985	1.47624	-2.36951	-1.11479	8.04547	11.971	18.5396	1.84944	16.4511
Diet: Standard Chow			32.5764	-0.684853	-1.95218	3.48599	-1.96802	-2.49	5.36018	18.017	13.5992	-3.33083	5.04202	2.95755	4.45395	-3.92209	-12.7697	-3.85035	6.23375	4.25159	-4.59133	0.065066	11.4253	1.79324	-2.269	-0.911835	2.45905	-1.06643	3.71334	-2.07045	20.247	-1.11824	1.61888	-3.29301	8.23478	-2.49338	1.51742	29.9206	-2.55785	3.90689	3.69852	0.368131	-0.933752	0.863785	9.31145	8.60368	15.7232	-0.273881	17.0728
Age: 10 weeks			37.0162	3.87393	1.88044	7.38938	3.10238	1.93876	9.71529	20.4438	14.2746	0.466699	10.6582	9.5077	9.9405	-0.156175	-8.84577	2.14134	26.1892	10.6774	-0.080569	7.02764	16.0351	4.74117	2.2977	1.93529	7.44294	2.07155	7.29087	2.45414	23.6605	2.54837	7.64732	-1.76757	11.2139	0.174547	4.25138	35.6872	1.98694	8.84196	6.14019	4.94472	5.67509	6.66692	15.7747	11.6621	22.1204	-0.331386	17.3675
Protein used: 2-4 ug/well			41.5417	163.705	152.945	150.4	205.781	191.566	191.472	203.344	175.034	210.016	262.231	295.606	277.508	222.192	235.126	221.542	195.121	280.383	278.809	286.598	257.654	243.689	256.659	286.687	281.44	280.548	196.053	254.51	177.731	219.172	201.561	195.041	181.329	167.835	194	185.405	167.17	214.939	183.878	202.457	301.23	282.941	250.935	149.563	146.265	168.759	201.976
			45.9833	169.658	153.771	156.035	229.341	218.849	214.282	233.276	176.59	222.254	289.726	322.862	290.215	257.885	241.777	238.02	255.827	308.325	297.701	338.961	274.896	265.716	314.686	331.961	301.324	330.308	211.72	256.914	212.529	254.171	230.988	221.327	196.202	169.057	208.602	193.818	176.489	228.29	194.806	220.92	339.33	314.293	265.662	162.535	160.925	182.452	218.908
SHEET LEGEND:			50.4247	162.576	144.063	149.046	223.963	215.509	210.394	231.471	166.675	216.883	286.823	319.485	281.726	261.078	231.554	231.901	264.319	304.423	290.81	274.498	266.592	261.135	323.358	331.813	294.935	327.703	204.659	240.692	214.574	252.066	233.377	219.707	188.448	160.375	202.969	187.227	169.55	221.595	187.376	215.948	338.009	308.497	263.879	160.593	157.844	180.377	216.304
YM = Young Male			54.9453	12.1418	8.15072	16.2124	11.8747	11.5023	13.6612	19.3158	18.4079	4.70082	23.4333	15.9691	7.90262	11.785	0.548344	0.346083	25.6894	17.7196	13.0199	2.24571	17.9815	15.3871	18.0429	20.9999	16.6599	17.0818	8.52964	11.3865	33.5843	14.4273	13.6921	11.5577	8.05064	4.23378	12.67	20.4825	14.0474	15.703	14.2176	4.16071	12.8921	23.2793	20.2005	11.5754	24.7934	5.76413	19.5055
YF = Young Female			59.3894	11.4626	6.52868	11.2757	11.1032	10.8714	13.56	17.8743	16.9191	4.34751	19.9423	17.6768	10.9592	10.7101	2.51539	1.8868	19.5829	18.7275	13.5519	4.67725	19.2118	17.2129	18.2932	18.9516	15.2725	14.6307	9.53511	11.4724	28.875	13.0756	11.6159	10.6384	9.12782	2.96681	9.65417	20.9747	10.3065	16.0037	13.8992	5.94053	15.0254	21.1335	20.6415	10.7403	20.1852	6.50774	18.9154
OM = Old Male			63.8401	13.3372	6.78	11.0529	13.2156	14.0714	16.8955	25.2591	17.5824	7.85765	23.122	22.0922	16.5859	13.1851	6.23871	5.78353	20.2324	22.5448	16.604	11.7974	22.1288	20.4656	22.3645	22.1607	18.9802	18.1181	17.3542	13.0916	29.8419	15.717	13.8193	12.9056	12.2008	5.63122	11.7072	21.8754	12.45	18.7431	15.3598	8.27102	19.7949	24.5415	25.4094	13.5792	20.6034	8.58104	21.0949
OF = Old Female
BT = BAT	Biological Sample Average:		Time (minutes)	NADH-YMBT1	NADH-YMBT2	NADH-YMBT3	NADH-YMBT4	NADH-YMBT5	NADH-YMBT6	NADH-YMBT7	NADH-YMBT8	NADH-YMBT9	NADH-YMBT10		Succ/Rot-YMBT1	Succ/Rot-YMBT2	Succ/Rot-YMBT3	Succ/Rot-YMBT4	Succ/Rot-YMBT5	Succ/Rot-YMBT6	Succ/Rot-YMBT7	Succ/Rot-YMBT8	Succ/Rot-YMBT9	Succ/Rot-YMBT10			NADH-YFBT1	NADH-YFBT2	NADH-YFBT3	NADH-YFBT4	NADH-YFBT5	NADH-YFBT6	NADH-YFBT7	NADH-YFBT8	NADH-YFBT9	NADH-YFBT10		Succ/Rot-YFBT1	Succ/Rot-YFBT2	Succ/Rot-YFBT3	Succ/Rot-YFBT4	Succ/Rot-YFBT5	Succ/Rot-YFBT6	Succ/Rot-YFBT7	Succ/Rot-YFBT8	Succ/Rot-YFBT9	Succ/Rot-YFBT10
1, 2, 3…10 = sample number	(the average of three technical replicates per biological sample)		1.30951	7.06357	-0.298123	-0.262694	5.03873	-1.99401	6.46685	8.14269	6.05522	8.30524	5.9046		4.6624	3.82115	2.89	7.6121	9.45293	3.24245	2.63135	4.10586	1.80612	11.5403			4.15242	5.38866	4.61202	3.68024	1.79094	3.18957	4.29618	-2.64186	0.556062	-0.440187		6.03722	27.354	3.71318	11.0454	5.30279	4.86579	10.8729	7.1523	2.25834	23.4174
MTDR = mitoTracker Deep Red			5.75478	8.05167	1.56622	1.3911	6.67152	-0.115752	7.75083	4.58672	7.01104	0.004347	9.47357		6.43644	7.24862	1.21539	11.965	12.6313	6.8918	3.31713	7.60749	3.44485	15.2896			3.51115	4.88437	5.52142	3.17078	6.19349	2.98168	8.87009	10.0526	5.04401	4.64129		5.55784	36.6678	2.2979	11.7518	6.56558	6.14783	8.27828	13.2601	6.35796	11.2163
			10.1948	6.90696	5.3908	0.5825	7.01347	1.22006	6.11081	0.829129	6.99933	-10.886	15.3727		5.70967	6.6565	0.377856	10.7419	14.0656	6.60825	4.41857	8.37674	11.7445	15.3276			2.73282	4.82511	5.89425	3.74493	4.06211	1.80859	7.39776	10.2696	8.18885	8.86551		5.1929	25.2037	4.92122	12.1454	6.75305	5.01716	6.58935	14.4541	7.70824	8.59215
			14.725	79.3241	56.7215	96.1516	96.6148	104.632	49.3511	84.7462	39.8361	42.652	65.099		137.257	143.329	179.785	168.926	147.367	87.0434	185.899	93.208	180.066	193.208			140.38	92.1759	94.2283	132.702	98.3229	64.2824	86.3177	259.852	113.439	206.471		228.096	139.381	131.373	162.968	162.703	149.067	136.97	469.079	403.348	396.283
			19.1682	70.8004	52.1171	84.7551	83.0936	89.8036	44.8294	74.5902	33.378	37.6655	54.657		132.803	141.624	173.544	163.217	142.942	87.1534	178.254	93.7229	179.19	189.427			119.642	82.1089	82.3182	113.554	85.0883	56.5235	76.6631	178.485	86.6421	157.104		223.573	138.018	131.639	159.139	158.003	145.903	132.567	463.606	388.624	385.97
			23.6072	62.7572	45.9021	77.0397	71.8864	76.9855	39.6146	63.5317	28.6757	34.4031	47.9242		121.839	131.677	155.999	150.216	130.426	81.8834	163.001	88.6317	174.987	178.037			101.897	71.6849	71.2744	97.3592	73.7196	49.4532	67.1461	135.269	71.4758	125.206		204.446	123.227	122.104	146.679	145.952	135.354	121.026	438.15	363.505	358.309
			28.1345	1.86242	10.2873	-6.26349	6.95251	0.812859	2.16909	4.1381	10.7867	-4.32774	7.67831		0.536025	2.58633	0.423759	0.787041	8.14842	9.98638	1.52039	6.68973	7.15869	9.11689			3.13127	3.15882	2.33613	3.4054	-3.33628	1.02946	2.64801	0.47282	7.33097	-0.210869		2.51587	10.5212	1.18187	4.12329	2.89408	0.356918	4.05905	0.549002	-3.82539	4.84303
			32.5764	0.282984	9.42847	-6.84738	4.42788	0.192154	0.816128	2.65785	8.01766	-4.0263	4.99573		0.300721	4.15117	1.96467	-0.240597	6.91589	9.62673	3.08049	6.47765	10.4871	9.20865			2.23596	2.01483	1.83489	6.01757	-3.10094	0.22282	2.0092	5.7701	7.52102	1.96374		2.98103	6.64866	0.832341	5.29992	3.97492	1.26691	4.89168	4.34214	1.03818	10.4272
			37.0162	4.38125	11.7283	-2.28687	9.26796	3.93885	3.20696	6.64229	11.1503	-0.928375	5.42889		4.91881	10.0355	12.262	3.89197	11.2854	13.9752	9.37224	9.2719	11.2931	12.4235			8.54753	5.46962	5.1841	10.7942	2.49677	3.46046	6.54208	10.5629	8.4006	7.30689		9.84622	13.8297	8.15195	10.8962	10.3015	6.80403	9.82438	11.395	9.44427	18.1142
			41.5417	155.683	196.132	226.287	262.647	243.704	181.402	200.425	154.862	683.089	633.025		196.273	278.448	251.438	274.929	199.488	182.192	278.369	214.182	561.361	483.846			290.027	149.262	174.736	241.372	169.769	187.879	189.731	561.598	597.976	694.178		333.116	175.284	167.837	249.696	214.133	258.889	196.3	565.107	575.455	569.725
			45.9833	159.821	210.707	245.894	293.191	266.314	195.529	214.672	168.637	429.049	434.423		220.824	300.934	287.284	315.991	232.563	192.97	306.428	226.93	349.516	304.105			324.962	157.189	179.02	250.433	176.658	204.825	199.987	188.618	260.554	266.487		369.808	173.271	177.555	270.081	231.219	279.644	206.333	342.882	382.916	376.082
			50.4247	151.895	205.01	241.511	267.408	257.685	189.51	208.306	166.272	237.025	258.995		216.622	296.011	286.517	316.702	233.339	186.582	303.462	222.141	266.647	244.098			326.192	150.974	169.486	241.853	168.919	198.63	191.783	122.785	150.412	165.935		356.842	163.642	172.105	267.506	226.501	274.193	200.68	279.563	325.832	321.114
			54.9453	12.1683	14.1415	4.22648	11.8714	12.3326	7.94739	11.3604	14.0443	52.4127	57.2441		12.3461	15.7684	18.8096	18.5676	20.5679	15.7333	18.7906	11.7837	66.2562	65.4804			18.7759	11.1473	9.36846	14.0353	10.2162	12.7077	12.0016	73.9597	65.7107	73.1336		21.1917	17.9337	9.72754	21.9625	12.2728	14.6262	15.8101	79.8106	72.9013	79.2539
			59.3894	9.75566	13.047	5.03744	13.7006	11.8794	7.57768	11.9478	12.4777	49.2752	56.4951		11.8449	16.1928	17.2874	17.5058	17.8555	13.6451	18.9335	13.633	58.0835	56.1415			21.6842	9.33168	9.6116	13.2544	11.5044	12.9541	13.1875	75.2366	59.9709	72.1261		23.9221	18.1744	11.6012	21.5112	13.502	17.6854	16.2306	85.0011	71.323	76.6372
			63.8401	10.39	16.8997	8.40245	18.1306	16.1879	10.2459	14.1246	14.2546	51.9147	58.8908		14.7275	20.6	19.7937	21.1685	19.7927	15.3442	23.2486	16.6841	57.1426	56.347			30.5441	11.0355	11.6933	16.4048	13.8495	15.422	16.2207	77.9242	61.2496	74.5793		29.3344	19.5808	13.871	25.0205	16.078	21.477	18.2678	87.4967	74.2848	79.1344
	Complex Linked Resp. Averages:			YMBT1	YMBT2	YMBT3	YMBT4	YMBT5	YMBT6	YMBT7	YMBT8	YMBT9	YMBT10														YFBT1	YFBT2	YFBT3	YFBT4	YFBT5	YFBT6	YFBT7	YFBT8	YFBT9	YFBT10
	(average of three consectutive time points)		CI	70.9605	51.5802	85.9821	83.8649	90.4736	44.5984	74.2894	33.9633	38.2402	55.8934													CI	120.64	81.9899	82.607	114.538	85.7103	56.753	76.7089	191.202	90.519	162.927
			CII	130.633	138.877	169.776	160.786	140.245	85.3601	175.718	91.8542	178.081	186.89													CII	218.705	133.542	128.372	156.262	155.553	143.441	130.188	456.945	385.159	380.187
			CIV	183.52	247.874	256.489	288.478	238.849	188.031	251.944	192.171	421.114	393.082													CIV	333.491	161.604	173.456	253.49	197.866	234.01	197.469	343.426	382.191	398.92
	Biological Sample Avg/ug pro:		Time (minutes)	NADH-YMBT1	NADH-YMBT2	NADH-YMBT3	NADH-YMBT4	NADH-YMBT5	NADH-YMBT6	NADH-YMBT7	NADH-YMBT8	NADH-YMBT9	NADH-YMBT10		Succ/Rot-YMBT1	Succ/Rot-YMBT2	Succ/Rot-YMBT3	Succ/Rot-YMBT4	Succ/Rot-YMBT5	Succ/Rot-YMBT6	Succ/Rot-YMBT7	Succ/Rot-YMBT8	Succ/Rot-YMBT9	Succ/Rot-YMBT10			NADH-YFBT1	NADH-YFBT2	NADH-YFBT3	NADH-YFBT4	NADH-YFBT5	NADH-YFBT6	NADH-YFBT7	NADH-YFBT8	NADH-YFBT9	NADH-YFBT10		Succ/Rot-YFBT1	Succ/Rot-YFBT2	Succ/Rot-YFBT3	Succ/Rot-YFBT4	Succ/Rot-YFBT5	Succ/Rot-YFBT6	Succ/Rot-YFBT7	Succ/Rot-YFBT8	Succ/Rot-YFBT9	Succ/Rot-YFBT10
			1.30951	3.53178	-0.149062	-0.131347	2.51937	-0.997006	3.23343	4.07135	3.02761	2.07631	1.47615		2.3312	1.91057	1.445	3.80605	4.72646	1.62122	1.31567	2.05293	0.45153	2.88507			2.07621	2.69433	2.30601	1.84012	0.895472	1.59478	2.14809	-0.660465	0.139015	-0.110047		3.01861	13.677	1.85659	5.5227	2.65139	2.4329	5.43645	1.78807	0.564584	5.85434
			5.75478	4.02583	0.783111	0.695551	3.33576	-0.057876	3.87541	2.29336	3.50552	0.00108675	2.36839		3.21822	3.62431	0.607695	5.98248	6.31563	3.4459	1.65857	3.80374	0.861212	3.82239			1.75557	2.44218	2.76071	1.58539	3.09674	1.49084	4.43505	2.51315	1.261	1.16032		2.77892	18.3339	1.14895	5.8759	3.28279	3.07392	4.13914	3.31502	1.58949	2.80407
			10.1948	3.45348	2.6954	0.29125	3.50674	0.61003	3.05541	0.414565	3.49967	-2.72149	3.84317		2.85483	3.32825	0.188928	5.37096	7.03281	3.30413	2.20928	4.18837	2.93612	3.83189			1.36641	2.41256	2.94713	1.87246	2.03106	0.904295	3.69888	2.56739	2.04721	2.21638		2.59645	12.6018	2.46061	6.07268	3.37652	2.50858	3.29467	3.61352	1.92706	2.14804
			14.725	39.662	28.3607	48.0758	48.3074	52.3159	24.6756	42.3731	19.918	10.663	16.2747		68.6285	71.6643	89.8925	84.4631	73.6835	43.5217	92.9496	46.604	45.0164	48.3019			70.1899	46.088	47.1142	66.3511	49.1615	32.1412	43.1588	64.963	28.3598	51.6177		114.048	69.6907	65.6867	81.4839	81.3515	74.5334	68.4852	117.27	100.837	99.0707
			19.1682	35.4002	26.0586	42.3776	41.5468	44.9018	22.4147	37.2951	16.689	9.41638	13.6643		66.4013	70.8122	86.772	81.6083	71.4708	43.5767	89.1268	46.8614	44.7974	47.3566			59.8208	41.0544	41.1591	56.7768	42.5442	28.2617	38.3315	44.6213	21.6605	39.2759		111.787	69.0088	65.8193	79.5695	79.0017	72.9513	66.2836	115.901	97.1561	96.4925
			23.6072	31.3786	22.951	38.5199	35.9432	38.4928	19.8073	31.7658	14.3379	8.60078	11.981		60.9195	65.8384	77.9994	75.1078	65.2132	40.9417	81.5007	44.3159	43.7468	44.5092			50.9486	35.8424	35.6372	48.6796	36.8598	24.7266	33.573	33.8173	17.8689	31.3016		102.223	61.6136	61.0521	73.3393	72.976	67.6771	60.5128	109.538	90.8762	89.5773
			28.1345	0.931212	5.14364	-3.13174	3.47626	0.40643	1.08454	2.06905	5.39334	-1.08194	1.91958		0.268012	1.29317	0.21188	0.39352	4.07421	4.99319	0.760195	3.34486	1.78967	2.27922			1.56564	1.57941	1.16807	1.7027	-1.66814	0.51473	1.324	0.118205	1.83274	-0.0527173		1.25793	5.26058	0.590935	2.06165	1.44704	0.178459	2.02952	0.13725	-0.956348	1.21076
			32.5764	0.141492	4.71424	-3.42369	2.21394	0.0960772	0.408064	1.32892	4.00883	-1.00658	1.24893		0.150361	2.07559	0.982335	-0.120299	3.45795	4.81336	1.54025	3.23882	2.62178	2.30216			1.11798	1.00741	0.917446	3.00878	-1.55047	0.11141	1.0046	1.44252	1.88026	0.490934		1.49052	3.32433	0.416171	2.64996	1.98746	0.633455	2.44584	1.08554	0.259545	2.60679
			37.0162	2.19062	5.86417	-1.14343	4.63398	1.96943	1.60348	3.32114	5.57517	-0.232094	1.35722		2.4594	5.01774	6.131	1.94599	5.6427	6.98759	4.68612	4.63595	2.82328	3.10587			4.27376	2.73481	2.59205	5.39712	1.24839	1.73023	3.27104	2.64072	2.10015	1.82672		4.92311	6.91486	4.07597	5.44811	5.15074	3.40202	4.91219	2.84874	2.36107	4.52854
			41.5417	77.8415	98.0658	113.143	131.324	121.852	90.7009	100.212	77.4311	170.772	158.256		98.1366	139.224	125.719	137.464	99.744	91.0958	139.184	107.091	140.34	120.962			145.013	74.6309	87.3678	120.686	84.8846	93.9397	94.8655	140.399	149.494	173.545		166.558	87.642	83.9183	124.848	107.067	129.445	98.1498	141.277	143.864	142.431
			45.9833	79.9106	105.353	122.947	146.596	133.157	97.7643	107.336	84.3185	107.262	108.606		110.412	150.467	143.642	157.995	116.281	96.4848	153.214	113.465	87.379	76.0262			162.481	78.5944	89.5098	125.216	88.3289	102.412	99.9933	47.1545	65.1384	66.6217		184.904	86.6354	88.7777	135.041	115.609	139.822	103.166	85.7205	95.729	94.0206
			50.4247	75.9475	102.505	120.755	133.704	128.842	94.7548	104.153	83.1359	59.2564	64.7487		108.311	148.006	143.259	158.351	116.67	93.2909	151.731	111.071	66.6617	61.0246			163.096	75.4871	84.743	120.927	84.4593	99.3151	95.8915	30.6964	37.603	41.4837		178.421	81.8211	86.0525	133.753	113.251	137.096	100.34	69.8909	81.4579	80.2784
			54.9453	6.08416	7.07076	2.11324	5.93571	6.16632	3.9737	5.68022	7.02216	13.1032	14.311		6.17304	7.88418	9.40481	9.28379	10.2839	7.86664	9.39531	5.89187	16.5641	16.3701			9.38796	5.57364	4.68423	7.01764	5.1081	6.35384	6.00079	18.4899	16.4277	18.2834		10.5959	8.96683	4.86377	10.9812	6.13642	7.3131	7.90506	19.9527	18.2253	19.8135
			59.3894	4.87783	6.52348	2.51872	6.85032	5.9397	3.78884	5.9739	6.23887	12.3188	14.1238		5.92243	8.09638	8.64371	8.75288	8.92774	6.82257	9.46675	6.81652	14.5209	14.0354			10.8421	4.66584	4.8058	6.62722	5.75221	6.47705	6.59374	18.8091	14.9927	18.0315		11.961	9.08718	5.80059	10.7556	6.751	8.84268	8.11529	21.2503	17.8307	19.1593
			63.8401	5.19502	8.44986	4.20123	9.06529	8.09397	5.12294	7.06232	7.12728	12.9787	14.7227		7.36375	10.3	9.89686	10.5842	9.89637	7.67209	11.6243	8.34207	14.2856	14.0867			15.272	5.51777	5.84667	8.20242	6.92475	7.71101	8.11035	19.4811	15.3124	18.6448		14.6672	9.79038	6.93549	12.5103	8.03901	10.7385	9.1339	21.8742	18.5712	19.7836
	Complex Linked Resp. Avg/ug pro:			YMBT1	YMBT2	YMBT3	YMBT4	YMBT5	YMBT6	YMBT7	YMBT8	YMBT9	YMBT10														YFBT1	YFBT2	YFBT3	YFBT4	YFBT5	YFBT6	YFBT7	YFBT8	YFBT9	YFBT10
			CI	35.4803	25.7901	42.9911	41.9325	45.2368	22.2992	37.1447	16.9816	9.56005	13.9733													CI	60.3198	40.995	41.3035	57.2692	42.8552	28.3765	38.3545	47.8005	22.6297	40.7317
			CII	65.3165	69.4383	84.8879	80.3931	70.1225	42.68	87.859	45.9271	44.5202	46.7226													CII	109.353	66.771	64.186	78.1309	77.7764	71.7206	65.0938	114.236	96.2898	95.0468
			CIV	91.7599	123.937	128.244	144.239	119.424	94.0153	125.972	96.0854	105.279	98.2705													CIV	166.746	80.8018	86.7282	126.745	98.9332	117.005	98.7344	85.8564	95.5477	99.73
	Biological Sample Avg/MTDR:		Time (minutes)	NADH-YMBT1	NADH-YMBT2	NADH-YMBT3	NADH-YMBT4	NADH-YMBT5	NADH-YMBT6	NADH-YMBT7	NADH-YMBT8	NADH-YMBT9	NADH-YMBT10		Succ/Rot-YMBT1	Succ/Rot-YMBT2	Succ/Rot-YMBT3	Succ/Rot-YMBT4	Succ/Rot-YMBT5	Succ/Rot-YMBT6	Succ/Rot-YMBT7	Succ/Rot-YMBT8	Succ/Rot-YMBT9	Succ/Rot-YMBT10			NADH-YFBT1	NADH-YFBT2	NADH-YFBT3	NADH-YFBT4	NADH-YFBT5	NADH-YFBT6	NADH-YFBT7	NADH-YFBT8	NADH-YFBT9	NADH-YFBT10		Succ/Rot-YFBT1	Succ/Rot-YFBT2	Succ/Rot-YFBT3	Succ/Rot-YFBT4	Succ/Rot-YFBT5	Succ/Rot-YFBT6	Succ/Rot-YFBT7	Succ/Rot-YFBT8	Succ/Rot-YFBT9	Succ/Rot-YFBT10
			1.30951	0.0013447	-6.18372e-05	-5.28039e-05	0.000920165	-0.000403736	0.00128237	0.00148962	0.00118928	0.000744204	0.000581957		0.000887585	0.000792588	0.000580917	0.00139011	0.00191397	0.000642972	0.000481377	0.000806415	0.00016184	0.00113741			0.000592839	0.000910723	0.000731311	0.00060627	0.000298088	0.000532117	0.000755452	-0.000173812	3.47715e-05	-2.89138e-05		0.00086193	0.00462302	0.000588787	0.00181958	0.000882607	0.000811764	0.00191192	0.000470562	0.000141217	0.00153818
			5.75478	0.0015328	0.000324868	0.000279624	0.00121834	-2.34368e-05	0.00153698	0.00083909	0.00137701	3.8952e-07	0.000933715		0.00122531	0.00150352	0.000244305	0.00218502	0.0025575	0.00136663	0.000606834	0.00149415	0.000308681	0.00150694			0.000501284	0.000825494	0.000875512	0.000522344	0.00103086	0.000497437	0.00155974	0.000661376	0.00031541	0.000304864		0.000793489	0.00619713	0.00036437	0.00193595	0.00109279	0.00102565	0.00145568	0.000872403	0.000397574	0.000736744
			10.1948	0.00131489	0.00111817	0.000117088	0.00128079	0.000247031	0.00121177	0.00015168	0.00137471	-0.000975453	0.00151513		0.00108695	0.0013807	7.59524e-05	0.00196167	0.00284792	0.00131041	0.000808329	0.00164524	0.00105238	0.00151068			0.000390163	0.00081548	0.000934632	0.000616926	0.000676106	0.000301728	0.00130084	0.000675652	0.000512062	0.000582334		0.000741387	0.00425961	0.000780341	0.00200079	0.00112399	0.000837016	0.00115869	0.000950957	0.000482009	0.000564378
			14.725	0.015101	0.0117653	0.0193273	0.0176436	0.0211852	0.00978626	0.0155034	0.00782404	0.0038219	0.00641616		0.0261298	0.0297295	0.0361384	0.030849	0.029838	0.0172606	0.0340082	0.0183066	0.016135	0.0190425			0.020042	0.0155784	0.0149415	0.0218609	0.0163651	0.0107243	0.0151783	0.0170961	0.00709353	0.0135621		0.0325652	0.0235565	0.0208314	0.0268468	0.0270806	0.0248689	0.0240852	0.0308615	0.025222	0.02603
			19.1682	0.0134783	0.0108102	0.0170366	0.0151744	0.0181829	0.00888961	0.0136455	0.00655563	0.00337508	0.005387		0.0252818	0.029376	0.0348839	0.0298064	0.028942	0.0172824	0.0326095	0.0184077	0.0160566	0.0186699			0.0170812	0.013877	0.0130529	0.0187064	0.0141623	0.00942985	0.0134806	0.0117428	0.00541787	0.0103194		0.0319194	0.023326	0.0208735	0.026216	0.0262984	0.024341	0.023311	0.0305014	0.0243013	0.0253526
			23.6072	0.0119471	0.00952108	0.0154857	0.0131278	0.0155876	0.00785551	0.0116224	0.00563207	0.00308274	0.00472341		0.0231946	0.0273126	0.0313572	0.0274321	0.026408	0.0162374	0.0298193	0.0174078	0.01568	0.0175473			0.0145478	0.0121153	0.0113017	0.0160386	0.01227	0.00825032	0.0118072	0.00889959	0.0044695	0.00822421		0.0291887	0.0208263	0.0193616	0.0241633	0.0242925	0.0225812	0.0212815	0.0288266	0.0227305	0.0235356
			28.1345	0.000354551	0.0021338	-0.00125902	0.00126966	0.000164583	0.000430127	0.00075702	0.00211857	-0.000387794	0.000756775		0.000102044	0.000536461	8.51795e-05	0.000143728	0.00164984	0.00198028	0.000278139	0.0013139	0.000641466	0.000898561			0.00044705	0.000533864	0.000370433	0.000560994	-0.000555297	0.000171746	0.000465633	3.11076e-05	0.000458418	-1.3851e-05		0.000359189	0.00177815	0.000187405	0.000679257	0.000481696	5.95449e-05	0.000713754	3.61197e-05	-0.000239208	0.000318116
			32.5764	5.3872e-05	0.00195567	-0.00137639	0.000808613	3.89063e-05	0.000161837	0.000486224	0.00157472	-0.000360783	0.000492379		5.72486e-05	0.000861043	0.000394916	-4.39374e-05	0.00140029	0.00190897	0.000563543	0.00127225	0.000939715	0.000907605			0.000319226	0.000340521	0.000290952	0.000991313	-0.000516127	3.71732e-05	0.000353303	0.000379624	0.000470302	0.000128989		0.0004256	0.00112367	0.000131981	0.00087309	0.000661594	0.00021136	0.000860167	0.000285677	6.49192e-05	0.000684911
			37.0162	0.000834063	0.00243271	-0.000459681	0.0016925	0.000797516	0.000635935	0.00121513	0.00218999	-8.31884e-05	0.000535071		0.000936399	0.00208157	0.00246477	0.000710746	0.002285	0.00277126	0.00171455	0.00182105	0.00101194	0.00122446			0.00122033	0.000924407	0.000822025	0.0017782	0.000415568	0.000577311	0.00115038	0.000694949	0.000525303	0.000479955		0.00140574	0.00233733	0.00129263	0.00179501	0.0017146	0.00113512	0.00172755	0.000749693	0.000590566	0.00118984
			41.5417	0.0296375	0.0406819	0.0454857	0.0479642	0.0493438	0.0359717	0.0366655	0.0304158	0.0612092	0.062391		0.0373647	0.0577562	0.0505413	0.050207	0.0403912	0.0361284	0.0509245	0.0420665	0.0503016	0.0476879			0.041407	0.0252264	0.0277072	0.0397628	0.0282567	0.0313441	0.0333628	0.0369485	0.0373924	0.0455973		0.0475589	0.0296243	0.0266133	0.0411341	0.0356408	0.0431907	0.0345179	0.0371793	0.0359842	0.0374226
			45.9833	0.0304253	0.0437051	0.0494269	0.0535421	0.0539217	0.038773	0.0392719	0.0331213	0.0384456	0.0428167		0.0420385	0.0624202	0.0577467	0.0577057	0.047088	0.0382656	0.0560577	0.0445704	0.0313189	0.0299726			0.0463947	0.0265661	0.0283865	0.0412554	0.0294033	0.034171	0.0351662	0.0124095	0.0162929	0.0175043		0.0527973	0.0292841	0.0281544	0.0444922	0.0384845	0.0466533	0.0362821	0.0225588	0.0239444	0.0247031
			50.4247	0.0289164	0.0425234	0.0485459	0.0488336	0.0521745	0.0375795	0.0381074	0.0326567	0.021239	0.0255265		0.0412386	0.0613992	0.0575926	0.0578356	0.0472451	0.0369989	0.055515	0.0436298	0.0238933	0.0240584			0.0465702	0.0255157	0.0268748	0.0398421	0.0281151	0.0331376	0.0337237	0.00807826	0.00940551	0.0108995		0.0509462	0.0276568	0.0272901	0.044068	0.0376993	0.0457438	0.0352881	0.0183929	0.0203748	0.0210924
			54.9453	0.00231649	0.00293326	0.000849562	0.00216794	0.00249704	0.00157596	0.00207827	0.00275839	0.00469652	0.00564198		0.00235034	0.0032707	0.0037809	0.00339078	0.00416447	0.00311989	0.00343754	0.0023144	0.00593699	0.00645375			0.00268063	0.00188397	0.00148553	0.00231212	0.0017004	0.00212003	0.00211039	0.00486593	0.004109	0.00480381		0.00302553	0.00303092	0.00154246	0.00361802	0.00204272	0.0024401	0.00278009	0.00525087	0.00455864	0.00520582
			59.3894	0.00185719	0.00270622	0.00101257	0.00250199	0.00240527	0.00150264	0.00218572	0.0024507	0.00441538	0.00556816		0.00225492	0.00335873	0.00347493	0.00319688	0.00361528	0.00270581	0.00346368	0.00267761	0.00520466	0.00553331			0.00309584	0.00157712	0.00152408	0.00218349	0.00191482	0.00216114	0.00231892	0.00494994	0.00375008	0.00473762		0.00341534	0.0030716	0.00183956	0.00354368	0.0022473	0.00295046	0.00285403	0.00559236	0.00445994	0.00503394
			63.8401	0.00197796	0.00350537	0.00168897	0.00331098	0.00327764	0.00203174	0.00258395	0.00279968	0.00465189	0.00580428		0.00280369	0.00427289	0.00397872	0.00386575	0.00400752	0.00304273	0.00425308	0.00327686	0.00512035	0.00555356			0.00436076	0.00186509	0.00185417	0.00270247	0.00230514	0.00257287	0.00285229	0.00512676	0.00383004	0.00489877		0.00418805	0.00330929	0.00219947	0.0041218	0.00267606	0.00358302	0.00321226	0.00575655	0.00464515	0.00519797
	Complex Linked Resp. Avg/MTDR:			YMBT1	YMBT2	YMBT3	YMBT4	YMBT5	YMBT6	YMBT7	YMBT8	YMBT9	YMBT10														YFBT1	YFBT2	YFBT3	YFBT4	YFBT5	YFBT6	YFBT7	YFBT8	YFBT9	YFBT10
			CI	0.0135088	0.0106989	0.0172832	0.0153153	0.0183186	0.00884379	0.0135904	0.00667058	0.00342657	0.00550885													CI	0.0172236	0.0138569	0.0130987	0.0188687	0.0142658	0.00946815	0.0134887	0.0125795	0.0056603	0.0107019
			CII	0.0248687	0.028806	0.0341265	0.0293625	0.028396	0.0169268	0.0321457	0.0180407	0.0159572	0.0184199													CII	0.0312244	0.0225696	0.0203555	0.025742	0.0258905	0.0239304	0.0228926	0.0300632	0.0240846	0.0249727
			CIV	0.0349368	0.0514143	0.0515565	0.0526814	0.0483607	0.0372862	0.0460904	0.0377434	0.0377346	0.0387422													CIV	0.0476124	0.0273122	0.0275044	0.0417591	0.0329333	0.0390401	0.0347235	0.0225945	0.023899	0.0262032
	MTDR (Mito. Content, RFU)/well:			YMBT1	YMBT2	YMBT3	YMBT4	YMBT5	YMBT6	YMBT7	YMBT8	YMBT9	YMBT10														YFBT1	YFBT2	YFBT3	YFBT4	YFBT5	YFBT6	YFBT7	YFBT8	YFBT9	YFBT10
			predicted MTDR in seahorse well	5252.9	4821.1	4974.9	5475.9	4938.9	5042.9	5466.3	5091.5	11159.9	10146.1													predicted MTDR in seahorse well	7004.3	5916.9	6306.5	6070.3	6008.1	5994.1	5686.9	15199.5	15991.9	15224.1
[truncated: 74 more columns]

## Sheet: Young-Cecum
SMAPLE INFORMATION:	All data from Seahorse Machine:		Time (minutes)	NADH-YMCC1			Succ/Rot-YMCC1			NADH-YMCC2			Succ/Rot-YMCC2			NADH-YMCC3			Succ/Rot-YMCC3			NADH-YMCC4			Succ/Rot-YMCC4			NADH-YMCC5			Succ/Rot-YMCC5			NADH-YMCC6			Succ/Rot-YMCC6			NADH-YMCC7			Succ/Rot-YMCC7			NADH-YMCC8			Succ/Rot-YMCC8
Tissue: Cecum			1.30951	-2.34592	0.303953	0.76856	-8.03354	2.59315	54.486	-6.82915	12.2686	-2.23481	3.27218	16.2479	3.6231	2.53704	30.697	56.6843	-1.67445	19.7358	27.1381	-1.16918	4.88461	17.7094	-3.96059	7.62903	6.16974	-1.17373	2.45308	12.2032	-1.80939	10.0702	24.6432	-1.24628	-8.23889	4.53282	3.30729	10.9788	96.7756	-6.14598	-3.42551	11.1632	22.2803	51.4439	7.72869	29.5361	22.6817	-7.20577	-6.89328
Tissue prep: Frozen			5.75478	0.251528	1.29562	49.1321	0.645331	5.19825	31.6172	-1.19859	37.7577	1.01364	4.12801	7.69556	0.939376	7.46371	24.9436	58.2192	3.37033	18.426	23.7818	-3.1298	10.4902	11.998	-0.442977	5.8437	4.28327	-0.785754	3.64778	15.9916	1.02536	6.06023	29.4709	-1.57304	-8.28995	1.05408	0.618519	4.47529	61.1766	-3.39629	-6.10431	17.282	5.04052	93.9767	4.60513	14.6094	21.3001	3.92655	1.06734
Entire region with fecal content			10.1948	-0.458108	-3.79702	26.4333	1.71428	6.49965	20.5863	-4.37058	39.1333	-0.410415	2.59063	1.59202	-1.96582	8.21772	20.8654	44.3555	2.40767	19.2046	17.8003	-6.06078	11.704	8.73773	-1.59991	13.0714	4.38859	1.59418	5.23182	12.9496	-1.14721	3.24986	39.9115	-0.506465	-7.58932	4.15975	2.61069	0.786691	40.4556	-3.32751	18.7758	10.7652	-3.01221	62.0302	3.73009	10.1089	11.172	3.47924	-3.52641
3 mL 1X MAS used			14.725	33.3975	64.7614	80.4788	12.0459	39.2583	40.5443	1.26125	15.8042	2.28867	73.0037	14.0141	26.4875	23.8151	57.5327	68.5594	30.7701	37.7186	57.4694	48.4276	54.6652	58.4342	28.38	43.3601	27.2859	69.2881	97.0957	77.6994	37.6389	39.5655	43.4255	76.7594	60.3178	60.8029	9.79053	38.1902	53.8364	40.0931	36.375	30.017	34.7963	58.1166	18.9381	31.0089	49.1115	26.0661	-4.47853
15 ml homogenizer used			19.1682	33.269	49.4391	55.8364	8.98115	26.9289	33.8511	2.13786	18.4283	0.39639	2.63771	11.5034	20.8556	22.287	70.2056	54.1371	23.4267	38.9288	41.8602	35.3636	41.9747	40.5051	24.1408	44.1163	25.6392	44.6452	61.1326	51.2485	30.5737	33.6608	54.2622	49.0569	38.3597	34.4012	15.3701	29.6734	26.6637	37.3953	27.5934	34.2944	22.8277	51.7374	19.2455	21.9943	46.7208	17.422	-5.87244
Sex: male and female			23.6072	26.6542	33.0144	42.7645	6.34642	17.9195	22.3861	4.39159	18.5379	-2.30836	46.493	6.54687	13.0583	15.5221	32.7799	49.0809	18.4151	32.2944	35.8616	27.7885	26.7816	31.05	25.8658	24.7653	20.7297	30.2538	38.3345	37.538	25.3957	25.8882	44.4862	34.4125	25.7143	21.785	10.1799	18.8459	16.4061	20.8176	19.9214	29.5602	13.2133	30.3301	13.3274	20.2407	35.3706	10.5814	-9.00906
Strain: C57BL/6J			28.1345	13.2202	18.0111	21.9671	-14.5108	0.04705	11.7921	10.0263	21.1573	-3.6607	-8.32203	2.36264	11.2868	5.57709	19.1098	43.4098	7.07419	23.5343	19.0517	14.9567	14.1016	13.5194	7.42768	26.4593	-6.77605	7.94447	21.8856	20.5916	4.45446	6.66274	29.9103	9.61039	20.795	16.6865	13.1125	-8.5671	11.1738	11.5136	20.9437	30.5434	0.073239	13.9366	9.6122	20.3231	30.0211	-0.604945	3.14713
Diet: Standard Chow			32.5764	26.0304	27.3764	22.1164	-9.03487	6.75126	11.6383	15.2147	28.2909	2.05522	43.3557	1.26185	6.43918	10.241	14.8902	39.4434	12.3539	26.0834	23.4994	19.1669	27.2946	21.0382	10.3881	24.9696	-1.08944	13.0617	23.3148	26.2933	5.99503	8.77008	25.9835	11.744	29.758	22.4233	21.1346	4.55669	9.86117	12.1926	16.3266	27.3812	2.74895	25.9449	11.2522	28.3906	35.0393	2.32315	9.91179
Age: 10 weeks			37.0162	28.7847	33.5519	28.412	-9.01265	3.87419	12.5421	12.35	32.1217	5.38342	34.2323	3.05042	3.88286	10.0676	17.902	34.3056	8.84456	22.7552	19.168	8.89829	22.156	27.1806	6.59201	24.5964	0.384402	10.0016	25.5257	23.7986	7.86456	9.04109	27.9389	9.42705	32.2162	18.8399	9.0006	9.31431	9.73069	10.9131	8.10104	23.8192	0.15281	24.6971	14.2908	31.1079	31.109	1.86691	6.73417
Protein used: 10 ug/well			41.5417	196.969	123.925	30.846	4.96145	1.03295	26.2886	24.1777	59.7709	18.2078	27.4358	2.18533	0.95165	58.6765	48.808	67.7401	18.6436	17.8172	11.5872	28.0672	58.6358	48.0193	10.6076	35.9404	19.8482	27.8379	74.4239	73.3697	21.8099	22.3673	14.8947	28.4682	28.0312	21.5862	-5.15071	9.80198	1.95973	37.3216	19.4965	17.227	-0.718717	28.1827	-2.12935	51.2624	38.7809	48.5441	5.87087
			45.9833	145.181	93.8758	24.7037	5.90281	8.46607	21.2282	21.0128	50.0248	21.084	26.2509	7.34199	-2.28943	41.9015	39.2292	51.4753	19.1942	14.6231	14.2333	24.627	47.385	40.544	16.3566	35.2516	20.7266	25.9253	59.9691	61.6599	19.9153	20.7402	25.4765	20.0061	24.4547	19.6546	2.5618	12.1295	2.83666	36.1047	15.3785	17.6532	1.33386	22.877	9.23014	46.3989	33.6967	34.4669	42.6507
SHEET LEGEND:			50.4247	110.192	73.4648	23.0239	6.29438	8.48652	20.445	22.229	51.8939	24.421	26.4082	3.18421	-0.199808	34.2022	38.5845	26.6452	13.0581	17.2032	16.0359	23.6504	41.1526	37.0082	16.2681	34.6045	19.8981	26.2907	51.4028	52.8052	23.1386	23.2469	26.3943	18.5429	23.6818	19.0778	8.03723	11.4359	7.55959	28.6985	14.2627	20.8503	9.0964	29.4073	14.0184	48.2919	31.7955	29.3044	-8.67755
YM = Young Male			54.9453	69.81	80.1712	32.1084	11.1104	6.45545	16.7479	10.4813	39.3953	7.12253	23.1791	-10.9131	4.50346	30.8445	33.5235	31.769	25.6844	11.3038	13.2291	26.4181	40.2719	40.1476	15.156	21.9765	7.36363	29.8351	43.47	49.508	10.9937	16.7388	17.4413	21.9735	32.0474	25.169	0.585385	-0.995427	6.65063	15.5982	5.80719	20.5502	10.7235	38.4896	2.98654	52.8433	20.2744	17.1654	-3.71601
YF = Young Female			59.3894	53.9471	55.7491	21.9745	3.94851	4.3959	13.2818	7.27138	34.5927	6.55179	22.7743	-9.68815	1.97396	27.753	31.2091	30.6762	10.6757	8.95573	10.1674	21.7857	29.1621	29.1593	10.9823	16.079	4.48308	23.2033	33.9016	33.8967	6.31389	18.0409	22.3951	17.4111	27.8827	24.8436	-3.6656	0.720089	0.434393	11.2917	3.37121	15.749	2.25831	31.0058	5.84602	44.2808	14.4842	20.5559	-2.96517
OM = Old Male			63.8401	46.0328	45.1367	15.2356	-0.841839	4.39485	13.5144	8.17535	30.2837	7.57763	22.8615	-8.53369	2.254	22.4244	27.4441	31.4939	9.77197	8.9133	11.0464	21.811	25.4935	25.5201	10.4879	14.9517	3.6365	18.0287	30.0965	28.2959	4.68155	15.0577	20.3173	16.9264	23.7047	21.1955	-5.1207	2.69882	8.17691	12.6423	2.57192	7.14946	-0.568262	8.28147	8.54291	40.9898	13.521	14.1583	-0.791913
OF = Old Female
CC = Cecum	Biological Sample Average:		Time (minutes)	NADH-YMCC1	NADH-YMCC2	NADH-YMCC3	NADH-YMCC4	NADH-YMCC5	NADH-YMCC6	NADH-YMCC7	NADH-YMCC8	NADH-YMCC9	NADH-YMCC10		Succ/Rot-YMCC1	Succ/Rot-YMCC2	Succ/Rot-YMCC3	Succ/Rot-YMCC4	Succ/Rot-YMCC5	Succ/Rot-YMCC6	Succ/Rot-YMCC7	Succ/Rot-YMCC8	Succ/Rot-YMCC9	Succ/Rot-YMCC10			NADH-YFCC1	NADH-YFCC2	NADH-YFCC3	NADH-YFCC4	NADH-YFCC5	NADH-YFCC6	NADH-YFCC7	NADH-YFCC8	NADH-YFCC9	NADH-YFCC10		Succ/Rot-YFCC1	Succ/Rot-YFCC2	Succ/Rot-YFCC3	Succ/Rot-YFCC4	Succ/Rot-YFCC5	Succ/Rot-YFCC6	Succ/Rot-YFCC7	Succ/Rot-YFCC8	Succ/Rot-YFCC9	Succ/Rot-YFCC10
1, 2, 3…10 = sample number	(the average of three technical replicates per biological sample)		1.30951	-0.424471	1.06821	29.9728	7.14162	4.49419	-1.65078	0.530584	15.004	-0.563008	-1.24141		16.3485	7.71439	15.0665	3.27939	10.968	37.0205	27.151	11.6199	22.9697	8.03751			11.2372	-0.963283	14.9185	2.96717	21.7581	6.5545	11.5926	11.4246	-4.29323	0.816254		9.14272	61.4239	16.8782	1.45456	6.30833	8.27546	21.0459	20.1074	4.9258	12.1448
MTDR = mitoTracker Deep Red			5.75478	16.8931	12.5242	30.2088	6.45279	6.28453	-2.9363	2.59378	13.2787	6.35631	4.88127		12.4869	4.25432	15.1927	3.228	12.1855	22.0901	34.5408	17.1027	14.2597	45.2092			11.554	1.75193	10.6873	4.27604	23.7461	4.20941	10.7448	10.3362	0.396031	4.50689		8.0876	38.8618	10.085	1.5829	15.1023	5.3339	19.4143	20.7851	6.19427	9.55221
			10.1948	7.39274	11.4508	24.4795	4.79364	6.59186	-1.31201	8.73785	8.25337	8.05253	4.88636		9.60007	0.738944	13.1375	5.28668	14.0047	14.6177	20.916	12.3743	17.9382	35.9918			8.07212	0.256134	10.588	7.3191	15.883	2.34451	10.2418	17.9055	1.74431	7.62594		8.72145	27.2435	13.1401	1.90966	15.1276	7.59067	17.5711	18.8408	10.5775	13.8155
			14.725	59.5459	6.45137	49.9691	53.8423	81.3611	65.9601	35.495	35.3955	71.0994	33.424		30.6162	37.8351	41.986	33.0087	40.21	33.939	37.2836	2.57039	31.2192	16.1562			51.1638	47.8249	88.8938	55.7365	33.4428	59.8009	95.7736	64.5929	64.3255	66.0966		15.0029	56.8563	39.9295	20.8085	41.6181	12.1183	34.0964	31.5503	19.7879	37.5216
			19.1682	46.1815	6.98753	48.8766	39.2812	52.3421	40.6059	33.0943	28.7123	54.9373	26.9874		23.2537	11.6656	34.7386	31.2988	39.4989	23.9024	31.2702	5.15258	26.512	14.9681			30.3158	28.7954	42.5138	31.9604	19.5131	46.4584	44.5579	51.7217	44.9908	45.9793		18.0144	48.6144	29.2744	21.0958	38.2145	17.7522	36.0131	31.4574	17.0885	25.5777
			23.6072	34.1443	6.8737	32.4609	28.54	35.3754	27.3039	23.433	22.0643	45.7187	22.3833		15.5507	22.0327	28.8571	23.7869	31.9234	15.144	18.9569	3.1306	23.5264	13.0315			18.5901	15.0715	25.8579	18.8715	11.5551	13.6814	23.0859	44.1834	35.7539	38.096		19.854	38.2818	21.9134	16.3115	34.0929	16.6578	33.0398	28.8163	19.9214	24.2305
			28.1345	17.7328	9.17428	22.6989	14.1925	16.8072	15.6973	21.0002	16.5798	35.3963	16.2606		-0.890574	1.77581	16.5534	9.03697	13.6758	5.23976	7.87402	9.73925	11.0209	12.8095			13.0385	7.35594	18.4226	12.5042	3.78047	8.18741	12.9723	30.974	25.0809	26.9807		12.5893	10.6665	13.0306	14.1087	14.2326	1.22038	17.6177	16.201	19.7718	13.2831
			32.5764	25.1744	15.1869	21.5249	22.4999	20.8899	21.3085	18.6335	21.9177	33.7852	14.8268		3.11824	17.0189	20.6456	11.4228	13.5829	11.8508	13.3153	12.4439	17.109	8.64398			14.481	7.17908	16.37	10.1757	6.66521	23.3321	11.9623	26.6408	21.1377	18.7751		23.705	16.5832	15.5548	10.3833	14.8225	4.66858	26.2829	15.5341	13.6621	17.1576
			37.0162	30.2495	16.6184	20.7584	19.4116	19.7753	20.161	14.2778	21.3613	29.1988	14.516		2.46788	13.7219	16.9226	10.5243	14.9482	9.34853	13.0469	11.5355	13.0669	9.67719			14.5251	5.36644	15.1873	7.17283	8.15332	18.4383	10.9304	23.4018	18.9871	13.3857		14.6133	15.6956	13.7966	9.09501	16.833	4.63532	18.3591	14.4934	16.1781	13.604
			41.5417	117.246	34.0521	58.4082	44.9074	58.5439	26.0285	24.6817	46.1958	70.709	80.6333		10.761	10.1909	16.016	22.1321	19.6906	2.20366	8.44487	9.93443	25.9935	38.104			24.499	25.3167	15.3872	13.9731	26.6039	50.4452	30.8154	101.985	86.0367	108.964		17.0626	27.9318	17.0377	11.0017	25.5488	17.077	36.1296	70.5312	50.3976	50.4565
			45.9833	87.9201	30.7072	44.202	37.5187	49.1848	21.3718	23.0455	38.1875	61.933	73.225		11.8657	10.4345	16.0168	24.1116	22.044	5.84266	11.147	24.9913	25.9425	30.0864			21.3177	22.0432	18.0738	13.4395	27.4344	43.5979	26.7727	90.3712	76.2972	95.1423		19.4754	32.6771	19.0168	15.6015	27.1226	17.2078	32.0405	69.7522	52.6595	48.9596
			50.4247	68.8937	32.848	33.1439	33.937	43.4996	20.4341	21.2705	36.4639	54.8014	65.6144		11.742	9.79754	15.4324	23.5903	24.2599	9.01089	17.5074	9.75058	23.9842	30.6668			20.6487	21.2665	18.6647	16.4771	24.8452	40.8252	24.209	81.0565	66.6075	84.5169		17.5343	31.1889	19.9155	15.9608	22.169	18.0088	32.6798	65.2066	50.9164	47.0471
			54.9453	60.6965	18.9997	32.0457	35.6125	40.9377	26.3966	13.9852	30.0944	71.063	47.3763		11.4379	5.5898	16.7391	14.832	15.0579	2.0802	17.3999	9.39333	18.9626	14.2688			7.70486	11.814	24.6236	8.09195	21.7261	14.6536	7.46194	34.8175	31.9815	26.7322		13.6318	23.3853	18.6614	3.17621	11.253	13.0292	15.731	21.2107	18.4948	19.1667
			59.3894	43.8902	16.1386	29.8794	26.7024	30.3339	23.3791	10.1373	26.4403	54.2849	35.5977		7.20872	5.02003	9.93292	10.5148	15.5833	-0.837038	13.0367	5.68366	15.6273	6.5914			7.91052	7.14392	16.3053	5.39566	10.905	17.3817	5.36175	29.6358	22.2831	30.0802		11.7312	21.5994	13.0728	3.08403	7.86034	7.10091	18.4585	19.6786	14.8286	18.1415
			63.8401	35.4684	15.3456	27.1208	24.2749	25.4737	20.6089	7.45457	22.8897	47.4777	27.4942		5.68915	5.52726	9.91054	9.69201	13.3522	1.91834	5.41871	10.6786	13.0603	6.81102			7.22899	7.73303	6.2073	4.86307	18.2262	18.3756	5.67208	25.2403	18.0934	30.6968		11.7816	17.9079	12.6477	4.88966	9.91444	7.65603	22.1576	19.2587	12.8955	18.0218
	Complex Linked Resp. Averages:			YMCC1	YMCC2	YMCC3	YMCC4	YMCC5	YMCC6	YMCC7	YMCC8	YMCC9	YMCC10														YFCC1	YFCC2	YFCC3	YFCC4	YFCC5	YFCC6	YFCC7	YFCC8	YFCC9	YFCC10
	(average of three consectutive time points)		CI	46.6239	6.77086	43.7689	40.5545	56.3595	44.6233	30.6741	28.724	57.2518	27.5982													CI	33.3565	30.5639	52.4219	35.5228	21.5037	39.9802	54.4725	53.4994	48.3567	50.0573
			CII	23.1402	23.8445	35.1939	29.3648	37.2108	24.3285	29.1703	3.61786	27.0859	14.7186													CII	17.6238	47.9175	30.3724	19.4053	37.9752	15.5094	34.3831	30.608	18.9326	29.1099
			CIV	51.4048	21.3384	30.5366	31.0329	36.2038	14.1486	17.6828	27.5873	43.8939	53.055													CIV	20.0896	26.7374	18.0159	14.409	25.6207	31.1936	30.4412	79.8172	63.8192	72.5144
	Biological Sample Avg/ug pro:		Time (minutes)	NADH-YMCC1	NADH-YMCC2	NADH-YMCC3	NADH-YMCC4	NADH-YMCC5	NADH-YMCC6	NADH-YMCC7	NADH-YMCC8	NADH-YMCC9	NADH-YMCC10		Succ/Rot-YMCC1	Succ/Rot-YMCC2	Succ/Rot-YMCC3	Succ/Rot-YMCC4	Succ/Rot-YMCC5	Succ/Rot-YMCC6	Succ/Rot-YMCC7	Succ/Rot-YMCC8	Succ/Rot-YMCC9	Succ/Rot-YMCC10			NADH-YFCC1	NADH-YFCC2	NADH-YFCC3	NADH-YFCC4	NADH-YFCC5	NADH-YFCC6	NADH-YFCC7	NADH-YFCC8	NADH-YFCC9	NADH-YFCC10		Succ/Rot-YFCC1	Succ/Rot-YFCC2	Succ/Rot-YFCC3	Succ/Rot-YFCC4	Succ/Rot-YFCC5	Succ/Rot-YFCC6	Succ/Rot-YFCC7	Succ/Rot-YFCC8	Succ/Rot-YFCC9	Succ/Rot-YFCC10
			1.30951	-0.0424471	0.106821	2.99728	0.714162	0.449419	-0.165078	0.0530584	1.5004	-0.0563008	-0.124141		1.63485	0.771439	1.50665	0.327939	1.0968	3.70205	2.7151	1.16199	2.29697	0.803751			1.12372	-0.0963283	1.49185	0.296717	2.17581	0.65545	1.15926	1.14246	-0.429323	0.0816254		0.914272	6.14239	1.68782	0.145456	0.630833	0.827546	2.10459	2.01074	0.49258	1.21448
			5.75478	1.68931	1.25242	3.02088	0.645279	0.628453	-0.29363	0.259378	1.32787	0.635631	0.488127		1.24869	0.425432	1.51927	0.3228	1.21855	2.20901	3.45408	1.71027	1.42597	4.52092			1.1554	0.175193	1.06873	0.427604	2.37461	0.420941	1.07448	1.03362	0.0396031	0.450689		0.80876	3.88618	1.0085	0.15829	1.51023	0.53339	1.94143	2.07851	0.619427	0.955221
			10.1948	0.739274	1.14508	2.44795	0.479364	0.659186	-0.131201	0.873785	0.825337	0.805253	0.488636		0.960007	0.0738944	1.31375	0.528668	1.40047	1.46177	2.0916	1.23743	1.79382	3.59918			0.807212	0.0256134	1.0588	0.73191	1.5883	0.234451	1.02418	1.79055	0.174431	0.762594		0.872145	2.72435	1.31401	0.190966	1.51276	0.759067	1.75711	1.88408	1.05775	1.38155
			14.725	5.95459	0.645137	4.99691	5.38423	8.13611	6.59601	3.5495	3.53955	7.10994	3.3424		3.06162	3.78351	4.1986	3.30087	4.021	3.3939	3.72836	0.257039	3.12192	1.61562			5.11638	4.78249	8.88938	5.57365	3.34428	5.98009	9.57736	6.45929	6.43255	6.60966		1.50029	5.68563	3.99295	2.08085	4.16181	1.21183	3.40964	3.15503	1.97879	3.75216
			19.1682	4.61815	0.698753	4.88766	3.92812	5.23421	4.06059	3.30943	2.87123	5.49373	2.69874		2.32537	1.16656	3.47386	3.12988	3.94989	2.39024	3.12702	0.515258	2.6512	1.49681			3.03158	2.87954	4.25138	3.19604	1.95131	4.64584	4.45579	5.17217	4.49908	4.59793		1.80144	4.86144	2.92744	2.10958	3.82145	1.77522	3.60131	3.14574	1.70885	2.55777
			23.6072	3.41443	0.68737	3.24609	2.854	3.53754	2.73039	2.3433	2.20643	4.57187	2.23833		1.55507	2.20327	2.88571	2.37869	3.19234	1.5144	1.89569	0.31306	2.35264	1.30315			1.85901	1.50715	2.58579	1.88715	1.15551	1.36814	2.30859	4.41834	3.57539	3.8096		1.9854	3.82818	2.19134	1.63115	3.40929	1.66578	3.30398	2.88163	1.99214	2.42305
			28.1345	1.77328	0.917428	2.26989	1.41925	1.68072	1.56973	2.10002	1.65798	3.53963	1.62606		-0.0890574	0.177581	1.65534	0.903697	1.36758	0.523976	0.787403	0.973925	1.10209	1.28095			1.30385	0.735594	1.84226	1.25042	0.378047	0.818741	1.29723	3.0974	2.50809	2.69807		1.25893	1.06665	1.30306	1.41087	1.42326	0.122038	1.76177	1.6201	1.97718	1.32831
			32.5764	2.51744	1.51869	2.15249	2.24999	2.08899	2.13085	1.86335	2.19177	3.37852	1.48268		0.311824	1.70189	2.06456	1.14228	1.35829	1.18508	1.33153	1.24439	1.7109	0.864398			1.4481	0.717908	1.637	1.01757	0.666521	2.33321	1.19623	2.66408	2.11377	1.87751		2.3705	1.65832	1.55548	1.03833	1.48225	0.466858	2.62829	1.55341	1.36621	1.71576
			37.0162	3.02495	1.66184	2.07584	1.94116	1.97753	2.0161	1.42778	2.13613	2.91988	1.4516		0.246788	1.37219	1.69226	1.05243	1.49482	0.934853	1.30469	1.15355	1.30669	0.967719			1.4525	0.536644	1.51873	0.717283	0.815332	1.84383	1.09304	2.34018	1.89871	1.33857		1.46133	1.56956	1.37966	0.909501	1.6833	0.463532	1.83591	1.44934	1.61781	1.3604
			41.5417	11.7246	3.40521	5.84082	4.49074	5.85439	2.60285	2.46817	4.61958	7.0709	8.06333		1.0761	1.01909	1.6016	2.21321	1.96906	0.220366	0.844487	0.993443	2.59935	3.8104			2.4499	2.53167	1.53872	1.39731	2.66039	5.04452	3.08154	10.1985	8.60367	10.8964		1.70626	2.79318	1.70377	1.10017	2.55488	1.7077	3.61296	7.05312	5.03976	5.04565
			45.9833	8.79201	3.07072	4.4202	3.75187	4.91848	2.13718	2.30455	3.81875	6.1933	7.3225		1.18657	1.04345	1.60168	2.41116	2.2044	0.584266	1.1147	2.49913	2.59425	3.00864			2.13177	2.20432	1.80738	1.34395	2.74344	4.35979	2.67727	9.03712	7.62972	9.51423		1.94754	3.26771	1.90168	1.56015	2.71226	1.72078	3.20405	6.97522	5.26595	4.89596
			50.4247	6.88937	3.2848	3.31439	3.3937	4.34996	2.04341	2.12705	3.64639	5.48014	6.56144		1.1742	0.979754	1.54324	2.35903	2.42599	0.901089	1.75074	0.975058	2.39842	3.06668			2.06487	2.12665	1.86647	1.64771	2.48452	4.08252	2.4209	8.10565	6.66075	8.45169		1.75343	3.11889	1.99155	1.59608	2.2169	1.80088	3.26798	6.52066	5.09164	4.70471
			54.9453	6.06965	1.89997	3.20457	3.56125	4.09377	2.63966	1.39852	3.00944	7.1063	4.73763		1.14379	0.55898	1.67391	1.4832	1.50579	0.20802	1.73999	0.939333	1.89626	1.42688			0.770486	1.1814	2.46236	0.809195	2.17261	1.46536	0.746194	3.48175	3.19815	2.67322		1.36318	2.33853	1.86614	0.317621	1.1253	1.30292	1.5731	2.12107	1.84948	1.91667
			59.3894	4.38902	1.61386	2.98794	2.67024	3.03339	2.33791	1.01373	2.64403	5.42849	3.55977		0.720872	0.502003	0.993292	1.05148	1.55833	-0.0837038	1.30367	0.568366	1.56273	0.65914			0.791052	0.714392	1.63053	0.539566	1.0905	1.73817	0.536175	2.96358	2.22831	3.00802		1.17312	2.15994	1.30728	0.308403	0.786034	0.710091	1.84585	1.96786	1.48286	1.81415
			63.8401	3.54684	1.53456	2.71208	2.42749	2.54737	2.06089	0.745457	2.28897	4.74777	2.74942		0.568915	0.552726	0.991054	0.969201	1.33522	0.191834	0.541871	1.06786	1.30603	0.681102			0.722899	0.773303	0.62073	0.486307	1.82262	1.83756	0.567208	2.52403	1.80934	3.06968		1.17816	1.79079	1.26477	0.488966	0.991444	0.765603	2.21576	1.92587	1.28955	1.80218
	Complex Linked Resp. Avg/ug pro:			YMCC1	YMCC2	YMCC3	YMCC4	YMCC5	YMCC6	YMCC7	YMCC8	YMCC9	YMCC10														YFCC1	YFCC2	YFCC3	YFCC4	YFCC5	YFCC6	YFCC7	YFCC8	YFCC9	YFCC10
			CI	4.66239	0.677086	4.37689	4.05545	5.63595	4.46233	3.06741	2.8724	5.72518	2.75982													CI	3.33565	3.05639	5.24219	3.55228	2.15037	3.99802	5.44725	5.34994	4.83567	5.00573
			CII	2.31402	2.38445	3.51939	2.93648	3.72108	2.43285	2.91703	0.361786	2.70859	1.47186													CII	1.76238	4.79175	3.03724	1.94053	3.79752	1.55094	3.43831	3.0608	1.89326	2.91099
			CIV	5.14048	2.13384	3.05366	3.10329	3.62038	1.41486	1.76828	2.75873	4.38939	5.3055													CIV	2.00896	2.67374	1.80159	1.4409	2.56207	3.11936	3.04412	7.98172	6.38192	7.25144
	Biological Sample Avg/MTDR:		Time (minutes)	NADH-YMCC1	NADH-YMCC2	NADH-YMCC3	NADH-YMCC4	NADH-YMCC5	NADH-YMCC6	NADH-YMCC7	NADH-YMCC8	NADH-YMCC9	NADH-YMCC10		Succ/Rot-YMCC1	Succ/Rot-YMCC2	Succ/Rot-YMCC3	Succ/Rot-YMCC4	Succ/Rot-YMCC5	Succ/Rot-YMCC6	Succ/Rot-YMCC7	Succ/Rot-YMCC8	Succ/Rot-YMCC9	Succ/Rot-YMCC10			NADH-YFCC1	NADH-YFCC2	NADH-YFCC3	NADH-YFCC4	NADH-YFCC5	NADH-YFCC6	NADH-YFCC7	NADH-YFCC8	NADH-YFCC9	NADH-YFCC10		Succ/Rot-YFCC1	Succ/Rot-YFCC2	Succ/Rot-YFCC3	Succ/Rot-YFCC4	Succ/Rot-YFCC5	Succ/Rot-YFCC6	Succ/Rot-YFCC7	Succ/Rot-YFCC8	Succ/Rot-YFCC9	Succ/Rot-YFCC10
			1.30951	-2.11893e-05	5.13968e-05	0.00105689	0.000280672	0.000240494	-5.81514e-05	2.27659e-05	0.000787921	-2.61595e-05	-5.4581e-05		0.000816109	0.000371175	0.000531272	0.000128883	0.000586922	0.00130411	0.00116497	0.000610211	0.00106726	0.000353386			0.000563027	-5.54404e-05	0.000717479	0.000164902	0.00120945	0.000323927	0.000572247	0.000405733	-0.00013046	4.31732e-05		0.000458087	0.00353517	0.000811731	8.08383e-05	0.000350656	0.000408978	0.00103889	0.000714094	0.000149682	0.00064236
			5.75478	0.000843293	0.000602599	0.00106522	0.000253601	0.000336299	-0.000103436	0.000111292	0.00069732	0.000295339	0.000214615		0.00062334	0.000204695	0.000535722	0.000126863	0.000652073	0.000778158	0.00148205	0.000898131	0.000662562	0.00198771			0.000578901	0.00010083	0.000513989	0.000237644	0.00131995	0.000208031	0.000530397	0.00036708	1.20343e-05	0.000238378		0.000405221	0.00223664	0.000485022	8.79707e-05	0.000839479	0.000263604	0.000958347	0.000738162	0.000188227	0.000505234
			10.1948	0.000369041	0.00055095	0.000863193	0.000188394	0.000352746	-4.62175e-05	0.000374917	0.000433418	0.000374152	0.000214839		0.00047923	3.5554e-05	0.000463252	0.000207771	0.000749425	0.00051493	0.000897448	0.000649825	0.000833479	0.00158245			0.000404445	1.47414e-05	0.000509211	0.000406763	0.000882875	0.000115867	0.000505565	0.000635896	5.30048e-05	0.00040335		0.000436979	0.00156796	0.00063195	0.00010613	0.000840884	0.000375135	0.000867361	0.000669111	0.000321421	0.00073073
			14.725	0.00297249	0.000310405	0.001762	0.00211605	0.00435382	0.00232354	0.00152299	0.00185876	0.00330355	0.00146955		0.00152834	0.00182042	0.0014805	0.00129727	0.00215173	0.00119555	0.00159974	0.000134982	0.00145056	0.000710341			0.00256351	0.00275249	0.0042752	0.00309759	0.00185895	0.00295539	0.00472767	0.00229395	0.00195468	0.00349597		0.000751707	0.00327229	0.00192034	0.00115644	0.00231339	0.000598893	0.0016831	0.00112048	0.000601301	0.00198459
			19.1682	0.00230535	0.000336202	0.00172348	0.00154379	0.00280095	0.00143041	0.00141999	0.0015078	0.0025526	0.00118656		0.00116081	0.000561285	0.00122494	0.00123007	0.00211368	0.000841998	0.00134172	0.000270583	0.00123185	0.000658102			0.00151894	0.00165728	0.00204463	0.00177622	0.00108466	0.002296	0.00219951	0.00183684	0.00136715	0.00243193		0.000902592	0.00279793	0.0014079	0.00117241	0.0021242	0.000877324	0.00177771	0.00111718	0.000519273	0.00135285
			23.6072	0.00170446	0.000330725	0.00114463	0.00112165	0.00189302	0.000961822	0.00100545	0.00115868	0.00212427	0.000984126		0.00077628	0.0010601	0.00101755	0.000934848	0.00170829	0.000533469	0.000813389	0.000164401	0.00109313	0.000572959			0.000931436	0.000867417	0.00124359	0.0010488	0.000642306	0.000676141	0.00113959	0.00156913	0.00108646	0.00201497		0.000994763	0.00220325	0.00105389	0.000906522	0.00189509	0.000823238	0.00163094	0.00102338	0.000605358	0.0012816
			28.1345	0.00088521	0.000441417	0.000800404	0.00055778	0.000899392	0.00055296	0.000901061	0.000870671	0.00164465	0.000714932		-4.44569e-05	8.54424e-05	0.000583703	0.000355161	0.000731825	0.000184578	0.000337853	0.000511448	0.000512073	0.000563194			0.000653279	0.000423361	0.000886002	0.000694927	0.000210142	0.000404626	0.000640354	0.00110001	0.00076214	0.00142706		0.000630776	0.000613895	0.000626685	0.000784102	0.000791133	6.03118e-05	0.000869664	0.000575361	0.00060081	0.00070257
			32.5764	0.00125669	0.000730714	0.000759006	0.000884268	0.00111787	0.000750623	0.00079951	0.00115099	0.00156979	0.000651892		0.00015566	0.000818858	0.000728	0.000448926	0.000726851	0.000417463	0.000571324	0.000653481	0.000794951	0.00038005			0.000725556	0.000413182	0.000787289	0.000565519	0.000370493	0.00115308	0.000590497	0.00094612	0.000642316	0.00099305		0.00118771	0.000954425	0.000748082	0.000577056	0.000823926	0.000230724	0.0012974	0.000551677	0.000415154	0.000907496
			37.0162	0.00151004	0.000799587	0.000731978	0.000762895	0.00105822	0.000710203	0.00061262	0.00112177	0.00135669	0.000638228		0.000123195	0.000660222	0.000596721	0.000413614	0.000799912	0.000329316	0.000559805	0.000605775	0.00060714	0.000425478			0.000727763	0.000308858	0.000730408	0.000398635	0.000453212	0.000911231	0.000539557	0.000831093	0.000576968	0.000707995		0.000732186	0.00090334	0.000663525	0.000505461	0.000935682	0.00022908	0.00090626	0.000514718	0.000491607	0.000719539
			41.5417	0.00585287	0.00163841	0.00205958	0.0017649	0.00313282	0.000916894	0.00105902	0.00242593	0.00328541	0.00354521		0.000537182	0.000490333	0.000564752	0.000869812	0.00105369	7.76274e-05	0.000362346	0.000521698	0.00120776	0.00167532			0.0012275	0.00145707	0.00074002	0.000776567	0.00147881	0.00249303	0.00152114	0.00362191	0.00261442	0.0057633		0.000854906	0.00160758	0.000819401	0.000611427	0.00142016	0.000843956	0.00178346	0.00250485	0.00153145	0.00266874
			45.9833	0.00438892	0.00147747	0.00155864	0.00147452	0.00263199	0.000752853	0.000988816	0.00200538	0.00287765	0.00321949		0.000592328	0.000502052	0.000564783	0.000947608	0.00117962	0.000205817	0.000478286	0.00131239	0.00120539	0.00132281			0.0010681	0.00126866	0.000869228	0.000746911	0.00152497	0.00215463	0.00132158	0.00320944	0.00231847	0.00503225		0.000975796	0.00188069	0.000914581	0.000867061	0.00150764	0.000850417	0.00158162	0.00247718	0.00160018	0.00258957
			50.4247	0.00343913	0.00158047	0.00116872	0.00133376	0.00232776	0.000719824	0.000912657	0.00191487	0.00254629	0.00288487		0.000586152	0.000471405	0.000544175	0.000927119	0.0012982	0.000317422	0.000751192	0.000512043	0.0011144	0.00134833			0.00103458	0.00122397	0.000897649	0.000915728	0.00138105	0.0020176	0.00119503	0.00287864	0.00202402	0.00447026		0.000878536	0.00179504	0.000957801	0.000887032	0.00123229	0.000890005	0.00161317	0.00231575	0.00154721	0.00248841
			54.9453	0.00302993	0.000914163	0.00112999	0.0013996	0.00219067	0.000929862	0.000600066	0.00158038	0.00330186	0.002083		0.000570973	0.000268951	0.000590251	0.000582912	0.000805785	7.3278e-05	0.000746581	0.000493282	0.000881078	0.000627356			0.000386044	0.000679941	0.00118423	0.000449715	0.00120767	0.000724188	0.000368343	0.00123651	0.000971832	0.00141392		0.000683009	0.00134591	0.000897489	0.00017652	0.000625513	0.000643911	0.000776528	0.000753279	0.000562006	0.00101376
			59.3894	0.00219097	0.000776504	0.0010536	0.00104943	0.00162324	0.000823566	0.000434964	0.00138849	0.00252229	0.00156513		0.000359855	0.000241537	0.000350253	0.000413241	0.000833898	-2.94859e-05	0.000559369	0.000298472	0.000726103	0.000289804			0.000396349	0.000411159	0.000784177	0.000299867	0.000606164	0.000859015	0.000264672	0.00105249	0.000677123	0.001591		0.000587779	0.00124313	0.000628713	0.000171397	0.000436926	0.000350931	0.000911165	0.000698865	0.0004506	0.00095954
			63.8401	0.00177056	0.000738346	0.000956329	0.000954026	0.00136316	0.000725979	0.000319855	0.00120203	0.002206	0.00120884		0.000283999	0.000265942	0.000349464	0.000380905	0.000714506	6.75765e-05	0.000232502	0.000560778	0.00060683	0.000299461			0.000362201	0.000445064	0.00029853	0.000270268	0.00101312	0.00090813	0.000279991	0.000896386	0.000549809	0.00162361		0.000590305	0.00103066	0.000608272	0.000271746	0.000551105	0.000378365	0.00109377	0.000683955	0.00039186	0.000953206
	Complex Linked Resp. Avg/MTDR:			YMCC1	YMCC2	YMCC3	YMCC4	YMCC5	YMCC6	YMCC7	YMCC8	YMCC9	YMCC10														YFCC1	YFCC2	YFCC3	YFCC4	YFCC5	YFCC6	YFCC7	YFCC8	YFCC9	YFCC10
			CI	0.00232744	0.000325778	0.00154337	0.00159383	0.00301593	0.00157192	0.00131614	0.00150842	0.00266014	0.00121341													CI	0.00167129	0.00175906	0.00252114	0.0019742	0.00119531	0.00197584	0.00268892	0.00189998	0.00146943	0.00264762
			CII	0.00115514	0.00114727	0.001241	0.00115406	0.00199123	0.000857007	0.00125161	0.000189989	0.00125852	0.000647134													CII	0.000883021	0.00275783	0.00146071	0.00107846	0.00211089	0.000766485	0.00169725	0.00108701	0.000575311	0.00153968
			CIV	0.0025661	0.00102669	0.00107677	0.00121962	0.00193735	0.000498406	0.00075872	0.00144872	0.00203948	0.00233267													CIV	0.00100657	0.00153883	0.000866447	0.000800788	0.00142415	0.00154161	0.00150267	0.00283463	0.00193929	0.00383542
	MTDR (Mito. Content, RFU)/well:			YMCC1	YMCC2	YMCC3	YMCC4	YMCC5	YMCC6	YMCC7	YMCC8	YMCC9	YMCC10														YFCC1	YFCC2	YFCC3	YFCC4	YFCC5	YFCC6	YFCC7	YFCC8	YFCC9	YFCC10
			predicted MTDR in seahorse well	20032.3	20783.7	28359.3	25444.7	18687.3	28387.7	23306.1	19042.5	21522.1	22744.3													predicted MTDR in seahorse well	19958.5	17375.1	20792.9	17993.5	17990.1	20234.5	20258.1	28157.9	32908.5	18906.5
[truncated: 74 more columns]

## Sheet: Young-Cerebellum
SMAPLE INFORMATION:	All data from Seahorse Machine:		Time (minutes)	NADH-YMCE1			Succ/Rot-YMCE1			NADH-YMCE2			Succ/Rot-YMCE2			NADH-YMCE3			Succ/Rot-YMCE3			NADH-YMCE4			Succ/Rot-YMCE4			NADH-YMCE5			Succ/Rot-YMCE5			NADH-YMCE6			Succ/Rot-YMCE6			NADH-YMCE7			Succ/Rot-YMCE7			NADH-YMCE8			Succ/Rot-YMCE8
Tissue: Cerebellum			1.30951	8.48941	5.40593	7.02851	-3.63181	0.819801	10.1232	6.88181	2.59409	-1.22402	10.1773	0.427187	11.4741	22.1843	10.7553	120.663	1.20082	11.3126	7.74024	6.44401	14.1579	6.23654	6.71521	0.221216	15.7017	11.9203	-1.4195	5.46604	17.0002	11.9876	14.6231	6.29615	11.6792	4.90212	-2.90788	9.29101	4.97601	10.7151	5.89868	11.625	-6.05965	4.09768	6.68613	-3.09035	2.78159	4.7723	10.4515
Tissue prep: Frozen			5.75478	12.1486	8.56692	6.40651	-0.246131	1.81446	21.3567	5.56889	9.40994	1.7563	7.84347	2.33384	13.2442	21.952	9.29206	70.7547	0.895175	11.2204	5.82863	3.72736	14.4673	7.71704	4.12728	-1.47097	13.8961	9.03875	0.600775	6.10387	13.4412	10.4695	6.63174	2.39742	14.336	8.82574	1.58264	11.8572	4.33046	10.0109	10.5737	2.13035	-4.18668	4.09828	4.80506	15.9955	3.65227	4.21568	6.96434
Entire region			10.1948	9.56546	6.8095	6.73957	-0.089906	4.8316	9.36275	5.46674	8.90484	2.07324	6.30775	0.034178	11.3615	22.8378	7.9546	63.7832	0.413846	9.87422	5.38829	4.39035	13.8387	8.47101	3.08993	-0.85977	11.6651	8.74093	2.16609	7.1798	15.1384	7.33122	8.54803	3.88388	15.0926	9.74374	1.04361	10.9728	2.58198	8.98781	13.9418	-0.599853	-2.0502	3.30116	3.76889	17.4132	4.64364	2.01075	6.50479
2 mL 1X MAS used			14.725	46.4174	41.1254	37.1913	39.5444	41.3203	46.8769	66.351	69.3922	52.9186	59.581	51.4035	56.7859	50.0313	37.0598	101.631	36.3574	58.093	59.6008	33.2442	41.9255	40.5412	37.2452	26.9318	42.6564	49.9744	37.6894	34.2991	41.8713	51.2532	34.5399	52.0593	56.0296	54.3774	46.7441	63.6393	39.7802	39.5392	40.0917	41.7987	43.2372	51.3569	48.4854	60.5967	61.3116	61.8008	54.8624
7 ml homogenizer used			19.1682	42.892	37.1244	33.1056	51.973	53.1942	54.6778	52.9171	57.241	46.7989	70.7575	64.9146	66.9295	50.0443	32.5373	78.6721	45.331	65.7915	61.388	32.6306	40.8626	39.037	46.2355	36.0741	49.8977	39.5953	36.6257	33.1052	48.5834	60.905	42.5794	46.6873	49.9434	46.9845	55.2036	70.1413	50.0559	34.3694	36.0266	46.2199	54.389	61.0551	57.7286	56.4465	56.9289	54.5001	66.6418
Sex: male and female			23.6072	38.1007	34.2625	29.0503	48.2135	51.5053	56.5691	46.0484	51.0895	41.3895	64.3906	61.0007	60.6835	45.5459	27.7569	61.912	43.6498	60.5037	55.814	30.0137	38.1945	34.2532	45.1336	33.5168	47.838	24.3954	34.958	29.9121	47.2344	56.2732	42.2473	42.8973	46.3243	41.3021	51.7133	63.6474	47.0223	30.906	33.1963	29.6306	50.4327	55.7489	52.4543	51.6882	50.9708	48.3427	59.6279
Strain: C57BL/6J			28.1345	11.5784	-0.456104	-1.2426	-0.831776	5.30402	24.6621	20.7029	9.18769	-1.38331	7.08322	10.378	12.9972	34.5053	9.21097	37.5613	8.18344	22.3166	17.2584	5.08643	14.2402	18.3563	25.3683	20.4334	5.89921	1.71985	-0.604053	7.53956	12.7423	6.97968	8.71099	-1.1343	4.58335	0.325055	10.3352	10.8068	6.79497	-0.583363	10.2106	14.0816	-5.44352	3.09496	8.97921	-10.9501	-2.16579	9.55672	8.08838
Diet: Standard Chow			32.5764	9.95863	-2.37496	-0.851098	0.290809	5.90403	21.1773	13.839	6.53782	-0.875433	9.65371	11.3937	13.3793	28.4335	7.64323	37.3145	6.86139	18.1169	15.0637	7.51952	14.1273	11.4053	19.1821	14.6323	6.58374	0.138484	-0.337386	6.79097	13.732	6.2343	6.94534	-2.21763	5.24532	2.61421	9.96083	12.1496	7.77984	-2.41358	6.24135	12.7843	-4.13253	4.62739	11.8881	-7.5412	-4.92303	9.83965	7.1977
Age: 10 weeks			37.0162	10.5849	-0.939899	-0.551432	3.88779	7.88599	17.4935	11.8063	6.36411	-1.72245	11.9426	11.4174	12.2361	29.7063	9.79997	37.6381	8.51758	18.947	15.8471	7.79035	13.457	7.31186	17.2172	12.2791	6.6533	-1.28368	1.09241	5.57758	15.6492	9.27034	7.49281	0.123181	6.20673	4.84907	10.0652	13.501	6.96923	-2.60256	5.61551	13.5568	-2.29819	5.75411	14.1624	-3.9488	-3.96234	8.16083	6.95841
Protein used: 6 ug/well			41.5417	64.2462	78.875	77.6845	131.591	98.2079	85.1948	76.6468	103.26	101.502	166.489	128.942	133.891	106.526	79.8093	102.065	113.005	105.09	90.1469	100.176	87.0158	84.7756	92.6958	77.6955	89.7342	91.0851	82.3251	87.3432	94.347	91.9363	80.3256	107.656	108.781	99.2503	75.5924	104.208	92.1093	99.007	79.6482	90.0041	119.607	123.225	118.308	90.5255	94.1067	88.0828	116.735
			45.9833	80.0601	93.8096	97.2489	156.777	119.601	99.9345	97.2702	119.964	122.494	195.932	152.862	157.929	128.727	94.5329	111.069	135.136	119.576	101.492	108.162	99.8641	98.3834	109.792	93.021	107.492	112.138	91.9122	98.8889	114.962	105.254	96.8227	134.452	123.542	118.021	93.7847	124.258	115.892	115.043	96.4156	100.577	139.951	141.055	132.168	114.661	114.878	111.952	139.736
SHEET LEGEND:			50.4247	88.7227	98.4394	102.681	162.298	127.988	105.774	108.139	123.426	128.433	201.757	162.853	165.028	129.684	98.278	115.502	139.745	124.161	102.327	111.771	103.988	101.635	118.108	97.6022	114.056	119.656	93.9947	101.662	121.279	108.631	102.651	143.659	129.267	126.139	104.796	132.607	127.573	117.47	99.0827	103.756	145.739	145.277	135.666	125.866	120.863	121.118	145.668
YM = Young Male			54.9453	25.7654	19.4643	18.3329	33.1344	29.8819	26.4877	26.6562	20.307	12.6601	35.8715	22.0847	24.9571	53.3558	18.7943	52.8822	29.3377	29.1826	21.2682	22.8635	25.9875	18.2126	24.2871	22.4441	30.2907	22.65	17.0941	20.4237	33.5005	27.6503	23.2783	25.9537	21.8063	24.0311	29.6913	30.8581	25.5173	19.6459	22.476	31.8274	18.1613	22.5855	27.4217	10.6579	17.7277	13.6253	22.2075
YF = Young Female			59.3894	14.8651	10.5241	8.92522	13.3201	18.6242	12.4417	18.6	14.9866	3.55743	23.2643	9.94235	15.7844	48.2433	12.1032	50.5022	14.8413	18.5871	13.4178	15.0483	19.4838	12.3436	17.1424	14.3859	21.905	14.7825	9.41237	21.2274	22.8733	16.2869	12.3786	14.1961	13.2019	12.3917	15.5841	19.3	10.5453	15.3015	16.9599	24.4404	8.27261	14.7383	17.1037	10.214	12.7995	6.71059	13.5952
OM = Old Male			63.8401	13.0508	11.1058	8.40834	11.1946	15.162	10.5032	15.8347	13.1273	4.48452	21.9478	9.43392	13.8056	47.4188	11.1236	46.4825	13.4083	18.6018	13.7933	15.7049	19.0216	11.0828	17.0333	12.8822	16.2994	12.8691	8.38611	17.5967	22.5842	14.2558	11.4473	11.9373	12.5276	10.4878	12.8266	16.8158	9.15852	14.6584	16.3756	23.6319	8.51543	16.0014	16.9577	11.679	10.507	6.46927	13.5445
OF = Old Female
CE = Cerebellum	Biological Sample Average:		Time (minutes)	NADH-YMCE1	NADH-YMCE2	NADH-YMCE3	NADH-YMCE4	NADH-YMCE5	NADH-YMCE6	NADH-YMCE7	NADH-YMCE8	NADH-YMCE9	NADH-YMCE10		Succ/Rot-YMCE1	Succ/Rot-YMCE2	Succ/Rot-YMCE3	Succ/Rot-YMCE4	Succ/Rot-YMCE5	Succ/Rot-YMCE6	Succ/Rot-YMCE7	Succ/Rot-YMCE8	Succ/Rot-YMCE9	Succ/Rot-YMCE10			NADH-YFCE1	NADH-YFCE2	NADH-YFCE3	NADH-YFCE4	NADH-YFCE5	NADH-YFCE6	NADH-YFCE7	NADH-YFCE8	NADH-YFCE9	NADH-YFCE10		Succ/Rot-YFCE1	Succ/Rot-YFCE2	Succ/Rot-YFCE3	Succ/Rot-YFCE4	Succ/Rot-YFCE5	Succ/Rot-YFCE6	Succ/Rot-YFCE7	Succ/Rot-YFCE8	Succ/Rot-YFCE9	Succ/Rot-YFCE10
1, 2, 3…10 = sample number	(the average of three technical replicates per biological sample)		1.30951	6.97462	2.75063	51.2009	8.94615	5.32226	7.62583	9.41294	1.48784	1.68827	8.19197		2.43707	7.35951	6.75121	7.54603	14.537	3.78638	1.57472	6.36571	1.89873	1.36422			4.41894	10.66	4.40642	10.2969	6.52341	8.9131	10.5829	2.07172	-0.675974	5.53452		9.58152	19.008	7.17862	2.59661	7.57524	10.9901	9.9001	-0.261278	3.30464	11.0416
MTDR = mitoTracker Deep Red			5.75478	9.04067	5.57838	33.9996	8.63724	5.2478	8.51971	7.57166	7.95447	4.62043	9.64763		7.64166	7.80718	5.9814	5.51748	10.1808	5.92342	1.57222	5.3473	4.13698	3.33232			4.49621	8.52718	3.64839	8.58404	5.8706	7.28419	5.04134	6.24713	-0.591558	3.30108		10.2293	8.28882	2.06358	3.48106	9.991	10.2804	7.86907	2.70762	1.10694	22.4127
			10.1948	7.70484	5.48161	31.5252	8.90003	6.02894	9.57342	7.44326	8.02251	5.99313	8.6154		4.70148	5.90115	5.22545	4.63176	10.3392	4.86612	1.67329	4.59802	4.80331	6.60133			4.44396	7.30569	3.23275	7.62284	6.57573	7.22578	2.75803	7.03725	-0.557657	3.15805		7.67098	5.6121	5.50922	3.74818	8.98041	8.69818	7.86333	2.15766	1.73612	21.1588
			14.725	41.578	62.8873	62.9072	38.5703	40.6543	54.1554	40.4765	61.2364	58.6048	77.8484		42.5806	55.9235	51.3504	35.6111	42.5548	50.0545	47.6932	52.3233	66.6874	96.2902			64.3554	68.9851	68.2733	48.368	77.7871	66.7418	70.4236	39.7303	50.0333	66.9757		65.7438	75.1537	56.0819	42.7557	67.7299	63.5158	56.0629	68.6456	94.592	96.3125
			19.1682	37.7073	52.319	53.7513	37.5101	36.4421	47.8717	38.872	55.9585	51.3301	69.1583		53.2817	67.5339	57.5035	44.0691	50.6893	58.4669	57.7242	61.8907	72.1992	93.9743			61.4287	62.9402	66.3531	46.3228	70.2572	64.0659	67.2311	34.9804	44.7564	58.3518		72.4823	78.0165	61.3649	46.8749	74.5185	71.5986	63.4596	69.1075	90.6437	100.294
			23.6072	33.8045	46.1758	45.0716	34.1538	29.7552	43.5079	31.2443	50.3339	48.0228	62.5122		52.096	62.0249	53.3225	42.1628	48.585	54.1276	52.8787	55.4166	73.2406	90.3744			56.2153	56.718	61.9685	42.4788	64.6235	60.4349	61.9249	31.5587	42.2573	53.2066		65.9093	68.1559	54.7269	42.7364	65.8391	66.1281	56.3729	66.3968	87.5682	97.5889
			28.1345	3.29322	9.50242	27.0925	12.561	2.88512	1.25803	7.90295	-1.18639	-2.50107	3.42833		9.71146	10.1528	15.9195	17.2336	9.47766	9.31235	2.21022	8.35048	-3.63629	10.3575			5.56005	-0.838646	3.96104	10.3216	3.36438	3.94147	11.0766	6.42899	2.131	2.15255		14.6275	22.2671	8.91133	11.4573	15.1228	15.2416	11.9551	4.7305	5.25343	6.16888
			32.5764	2.24419	6.50046	24.4637	11.0174	2.19736	1.88063	5.53736	-0.87486	-0.11106	5.22359		9.12403	11.4756	13.3473	13.466	8.97056	9.96341	4.12764	9.03087	-2.70983	5.48635			4.50221	0.627607	3.429	8.37778	5.67808	2.45199	9.98269	3.76198	3.95063	-1.03935		16.4914	19.9377	8.80963	11.1067	16.7963	16.384	11.7393	5.41464	5.32773	4.1837
			37.0162	3.0312	5.48266	25.7148	9.51973	1.79544	3.72632	5.52326	0.0832327	1.51666	6.07978		9.75577	11.8654	14.4372	12.0499	10.8041	10.1785	5.87276	9.72285	-0.578157	5.956			5.38051	1.96051	4.15183	8.73932	5.97567	4.55159	10.1202	4.18489	3.41795	-0.107142		17.616	19.9238	10.108	11.4982	16.561	17.288	13.4867	7.04579	8.0067	6.67072
			41.5417	73.6019	93.8029	96.1335	90.6559	86.9178	105.229	89.5531	90.905	121.128	76.7929		104.998	143.107	102.747	86.7085	88.8696	90.6366	120.38	117.415	116.987	102.141			86.3346	93.3816	89.1938	83.7203	109.393	83.6761	82.6333	70.8291	71.7838	63.4631		114.705	101.734	91.077	79.3434	109.971	104.868	95.906	94.2806	92.4359	119.438
			45.9833	90.3729	113.243	111.443	102.136	100.98	125.338	104.012	113.83	144.285	89.421		125.437	168.908	118.735	103.435	105.68	111.312	137.725	139.465	139.286	121.461			101.616	108.851	100.238	96.3332	129.867	100.476	95.4277	87.7105	82.6256	73.4739		133.068	118.606	107.73	95.8221	131.804	120.737	114.748	113.256	109.029	131.645
			50.4247	96.6144	119.999	114.488	105.798	105.104	133.022	106.77	122.615	156.167	92.2656		132.02	176.546	122.078	109.922	110.854	121.658	142.227	145.207	151.778	129.578			108.081	116.612	104.902	101.549	136.344	104.944	100.511	97.0964	85.6716	77.829		137.266	124.345	114.671	102.344	140.645	126.073	120.7	123.772	114.756	134.982
			54.9453	21.1876	19.8745	41.6774	22.3545	20.056	23.9304	24.6498	14.0036	31.0878	16.4148		29.8346	27.6378	26.5962	25.674	28.143	28.6889	22.7228	21.6224	34.8421	25.6939			15.0568	20.8147	14.8639	22.4936	19.4292	19.2503	20.6234	23.7854	15.1232	10.5647		25.8444	32.2521	21.5147	27.5142	29.3603	23.243	25.8943	27.0195	20.364	34.0239
			59.3894	11.4381	12.3814	36.9496	15.6252	15.1407	13.2632	18.9006	9.90803	13.2932	10.0495		14.7953	16.3304	15.6154	17.8111	17.1796	15.1432	13.3716	14.0991	15.5153	12.4022			10.2908	12.6347	9.84976	13.8166	16.1603	13.8696	15.4387	10.0503	6.31251	4.21256		17.4333	46.849	13.3253	18.0525	19.2905	14.2977	17.2422	11.7923	10.4945	24.0352
			63.8401	10.855	11.1489	35.0083	15.2698	12.9506	11.6509	18.222	9.55177	10.0526	9.4504		12.2866	15.0624	15.2678	15.405	16.0958	12.9337	13.8248	14.281	12.7766	11.6711			9.68182	12.5336	8.49097	13.0073	13.449	13.731	16.3686	9.84181	5.1972	2.97992		17.1928	23.9893	12.1451	17.4239	18.1552	13.2727	14.4211	9.20044	8.96883	22.1776
	Complex Linked Resp. Averages:			YMCE1	YMCE2	YMCE3	YMCE4	YMCE5	YMCE6	YMCE7	YMCE8	YMCE9	YMCE10														YFCE1	YFCE2	YFCE3	YFCE4	YFCE5	YFCE6	YFCE7	YFCE8	YFCE9	YFCE10
	(average of three consectutive time points)		CI	37.6966	53.794	53.91	36.7447	35.6172	48.5117	36.8643	55.8429	52.6525	69.8396													CI	60.6665	62.8811	65.5316	45.7232	70.8893	63.7475	66.5265	35.4231	45.6823	59.5114
			CII	49.3194	61.8274	54.0588	40.6143	47.2763	54.2164	52.7653	56.5436	70.7091	93.5463													CII	68.0451	73.7754	57.3912	44.1223	69.3625	67.0808	58.6318	68.05	90.9346	98.0653
			CIV	103.841	135.934	110.937	99.776	99.7341	114.533	116.778	121.573	138.272	101.943													CIV	113.512	110.588	101.302	93.1854	126.337	106.796	101.654	97.8241	92.7171	100.139
	Biological Sample Avg/ug pro:		Time (minutes)	NADH-YMCE1	NADH-YMCE2	NADH-YMCE3	NADH-YMCE4	NADH-YMCE5	NADH-YMCE6	NADH-YMCE7	NADH-YMCE8	NADH-YMCE9	NADH-YMCE10		Succ/Rot-YMCE1	Succ/Rot-YMCE2	Succ/Rot-YMCE3	Succ/Rot-YMCE4	Succ/Rot-YMCE5	Succ/Rot-YMCE6	Succ/Rot-YMCE7	Succ/Rot-YMCE8	Succ/Rot-YMCE9	Succ/Rot-YMCE10			NADH-YFCE1	NADH-YFCE2	NADH-YFCE3	NADH-YFCE4	NADH-YFCE5	NADH-YFCE6	NADH-YFCE7	NADH-YFCE8	NADH-YFCE9	NADH-YFCE10		Succ/Rot-YFCE1	Succ/Rot-YFCE2	Succ/Rot-YFCE3	Succ/Rot-YFCE4	Succ/Rot-YFCE5	Succ/Rot-YFCE6	Succ/Rot-YFCE7	Succ/Rot-YFCE8	Succ/Rot-YFCE9	Succ/Rot-YFCE10
			1.30951	1.16244	0.458438	8.53349	1.49102	0.887044	1.27097	1.56882	0.247974	0.281378	1.36533		0.406179	1.22658	1.1252	1.25767	2.42283	0.631063	0.262454	1.06095	0.316456	0.22737			0.73649	1.77667	0.734404	1.71615	1.08723	1.48552	1.76382	0.345286	-0.112662	0.92242		1.59692	3.16801	1.19644	0.432768	1.26254	1.83168	1.65002	-0.0435463	0.550773	1.84027
			5.75478	1.50678	0.929729	5.6666	1.43954	0.874633	1.41995	1.26194	1.32574	0.770072	1.60794		1.27361	1.3012	0.9969	0.919581	1.6968	0.987236	0.262036	0.891216	0.689496	0.555387			0.749369	1.4212	0.608066	1.43067	0.978433	1.21403	0.840224	1.04119	-0.0985931	0.550181		1.70488	1.38147	0.34393	0.580177	1.66517	1.7134	1.31151	0.451271	0.18449	3.73545
			10.1948	1.28414	0.913601	5.2542	1.48334	1.00482	1.59557	1.24054	1.33709	0.998856	1.4359		0.78358	0.983525	0.870909	0.77196	1.7232	0.81102	0.278881	0.766337	0.800552	1.10022			0.740661	1.21761	0.538792	1.27047	1.09596	1.2043	0.459672	1.17288	-0.0929428	0.526342		1.2785	0.93535	0.918204	0.624697	1.49673	1.4497	1.31055	0.35961	0.289353	3.52646
			14.725	6.92967	10.4812	10.4845	6.42838	6.77572	9.0259	6.74609	10.2061	9.76746	12.9747		7.09676	9.32058	8.5584	5.93519	7.09247	8.34242	7.94886	8.72055	11.1146	16.0484			10.7259	11.4975	11.3789	8.06133	12.9645	11.1236	11.7373	6.62171	8.33888	11.1626		10.9573	12.5256	9.34698	7.12595	11.2883	10.586	9.34382	11.4409	15.7653	16.0521
			19.1682	6.28456	8.71983	8.95854	6.25168	6.07368	7.97862	6.47866	9.32641	8.55502	11.5264		8.88028	11.2556	9.58392	7.34485	8.44821	9.74449	9.6207	10.3151	12.0332	15.6624			10.2381	10.49	11.0588	7.72047	11.7095	10.6776	11.2052	5.83007	7.45941	9.72531		12.0804	13.0027	10.2275	7.81249	12.4197	11.9331	10.5766	11.5179	15.1073	16.7157
			23.6072	5.63408	7.69597	7.51193	5.6923	4.95919	7.25132	5.20739	8.38898	8.0038	10.4187		8.68266	10.3375	8.88708	7.02713	8.09749	9.02127	8.81311	9.23611	12.2068	15.0624			9.36922	9.45299	10.3281	7.07981	10.7706	10.0725	10.3208	5.25978	7.04288	8.86776		10.9849	11.3593	9.12115	7.12273	10.9732	11.0214	9.39548	11.0661	14.5947	16.2648
			28.1345	0.54887	1.58374	4.51542	2.0935	0.480853	0.209672	1.31716	-0.197732	-0.416845	0.571388		1.61858	1.69214	2.65325	2.87227	1.57961	1.55206	0.36837	1.39175	-0.606048	1.72624			0.926674	-0.139774	0.660173	1.72027	0.56073	0.656912	1.8461	1.0715	0.355166	0.358758		2.43791	3.71118	1.48522	1.90955	2.52046	2.54027	1.99252	0.788417	0.875572	1.02815
			32.5764	0.374032	1.08341	4.07729	1.83623	0.366226	0.313439	0.922894	-0.14581	-0.01851	0.870598		1.52067	1.91259	2.22456	2.24434	1.49509	1.66057	0.68794	1.50515	-0.451638	0.914392			0.750369	0.104601	0.571499	1.3963	0.946346	0.408665	1.66378	0.626996	0.658438	-0.173224		2.74857	3.32294	1.46827	1.85112	2.79938	2.73067	1.95655	0.902441	0.887955	0.697284
			37.0162	0.5052	0.913777	4.2858	1.58662	0.299239	0.621054	0.920544	0.0138721	0.252777	1.0133		1.62596	1.97756	2.4062	2.00831	1.80069	1.69641	0.978794	1.62048	-0.0963595	0.992666			0.896751	0.326752	0.691972	1.45655	0.995944	0.758599	1.68671	0.697482	0.569659	-0.0178571		2.93601	3.32063	1.68467	1.91636	2.76016	2.88133	2.24779	1.1743	1.33445	1.11179
			41.5417	12.267	15.6338	16.0223	15.1093	14.4863	17.5382	14.9255	15.1508	20.188	12.7988		17.4997	23.8512	17.1245	14.4514	14.8116	15.1061	20.0634	19.5691	19.4978	17.0235			14.3891	15.5636	14.8656	13.9534	18.2321	13.946	13.7722	11.8049	11.964	10.5772		19.1175	16.9556	15.1795	13.2239	18.3284	17.4781	15.9843	15.7134	15.406	19.9064
			45.9833	15.0621	18.8738	18.5738	17.0227	16.8299	20.8897	17.3353	18.9717	24.0475	14.9035		20.9062	28.1513	19.7891	17.2391	17.6133	18.5519	22.9542	23.2441	23.2143	20.2435			16.936	18.1419	16.7063	16.0555	21.6445	16.7459	15.9046	14.6184	13.7709	12.2457		22.178	19.7677	17.9551	15.9703	21.9673	20.1229	19.1246	18.876	18.1716	21.9409
			50.4247	16.1024	19.9999	19.0814	17.633	17.5173	22.1703	17.7949	20.4359	26.0278	15.3776		22.0034	29.4243	20.3463	18.3203	18.4756	20.2764	23.7045	24.2012	25.2963	21.5963			18.0136	19.4354	17.4836	16.9249	22.724	17.4906	16.7518	16.1827	14.2786	12.9715		22.8776	20.7241	19.1118	17.0574	23.4408	21.0122	20.1167	20.6286	19.1261	22.497
			54.9453	3.53126	3.31241	6.94624	3.72575	3.34266	3.9884	4.1083	2.33394	5.1813	2.7358		4.97244	4.6063	4.43269	4.27899	4.6905	4.78149	3.78714	3.60373	5.80702	4.28231			2.50946	3.46912	2.47732	3.74893	3.23821	3.20838	3.43723	3.96423	2.52054	1.76079		4.30739	5.37535	3.58578	4.5857	4.89339	3.87384	4.31571	4.50326	3.394	5.67065
			59.3894	1.90636	2.06356	6.15826	2.60421	2.52346	2.21054	3.1501	1.65134	2.21553	1.67492		2.46589	2.72173	2.60256	2.96851	2.86327	2.52386	2.22859	2.34984	2.58588	2.06704			1.71513	2.10578	1.64163	2.30277	2.69338	2.31159	2.57311	1.67505	1.05208	0.702093		2.90555	7.80816	2.22088	3.00874	3.21508	2.38295	2.8737	1.96538	1.74909	4.00586
			63.8401	1.80917	1.85814	5.83472	2.54496	2.15844	1.94181	3.03699	1.59196	1.67543	1.57507		2.04776	2.51041	2.54463	2.56749	2.68263	2.15561	2.30414	2.38016	2.12944	1.94518			1.61364	2.08893	1.41516	2.16789	2.2415	2.28849	2.7281	1.6403	0.866201	0.496653		2.86547	3.99821	2.02418	2.90398	3.02586	2.21211	2.40352	1.53341	1.4948	3.69626
	Complex Linked Resp. Avg/ug pro:			YMCE1	YMCE2	YMCE3	YMCE4	YMCE5	YMCE6	YMCE7	YMCE8	YMCE9	YMCE10														YFCE1	YFCE2	YFCE3	YFCE4	YFCE5	YFCE6	YFCE7	YFCE8	YFCE9	YFCE10
			CI	6.28277	8.96567	8.985	6.12412	5.9362	8.08528	6.14405	9.30715	8.77542	11.6399													CI	10.1111	10.4802	10.9219	7.62054	11.8149	10.6246	11.0878	5.90385	7.61372	9.91856
			CII	8.2199	10.3046	9.0098	6.76906	7.87939	9.03606	8.79422	9.42393	11.7848	15.591													CII	11.3409	12.2959	9.5652	7.35372	11.5604	11.1801	9.77197	11.3417	15.1558	16.3442
			CIV	17.3068	22.6557	18.4896	16.6293	16.6223	19.0888	19.463	20.2622	23.0453	16.9905													CIV	18.9186	18.4314	16.8837	15.5309	21.0562	17.7993	16.9424	16.304	15.4529	16.6898
	Biological Sample Avg/MTDR:		Time (minutes)	NADH-YMCE1	NADH-YMCE2	NADH-YMCE3	NADH-YMCE4	NADH-YMCE5	NADH-YMCE6	NADH-YMCE7	NADH-YMCE8	NADH-YMCE9	NADH-YMCE10		Succ/Rot-YMCE1	Succ/Rot-YMCE2	Succ/Rot-YMCE3	Succ/Rot-YMCE4	Succ/Rot-YMCE5	Succ/Rot-YMCE6	Succ/Rot-YMCE7	Succ/Rot-YMCE8	Succ/Rot-YMCE9	Succ/Rot-YMCE10			NADH-YFCE1	NADH-YFCE2	NADH-YFCE3	NADH-YFCE4	NADH-YFCE5	NADH-YFCE6	NADH-YFCE7	NADH-YFCE8	NADH-YFCE9	NADH-YFCE10		Succ/Rot-YFCE1	Succ/Rot-YFCE2	Succ/Rot-YFCE3	Succ/Rot-YFCE4	Succ/Rot-YFCE5	Succ/Rot-YFCE6	Succ/Rot-YFCE7	Succ/Rot-YFCE8	Succ/Rot-YFCE9	Succ/Rot-YFCE10
			1.30951	0.000475019	0.000161847	0.00254962	0.000428234	0.000244569	0.000393169	0.000425721	8.4526e-05	0.00012886	0.000623979		0.000165981	0.000433035	0.000336185	0.000361213	0.000668004	0.000195216	7.12202e-05	0.000361643	0.000144924	0.000103912			0.0002376	0.000596779	0.00023312	0.000581721	0.000343652	0.000429212	0.000502075	0.000146753	-3.94439e-05	0.000418274		0.000515186	0.00106412	0.000379781	0.000146694	0.000399062	0.000529229	0.00046968	-1.8508e-05	0.00019283	0.000834474
			5.75478	0.000615732	0.000328232	0.00169305	0.000413447	0.000241147	0.000439255	0.000342445	0.000451902	0.000352662	0.000734856		0.00052045	0.000459376	0.000297852	0.000264111	0.00046783	0.000305397	7.1107e-05	0.000303786	0.000315761	0.000253822			0.000241755	0.000477376	0.000193016	0.000484952	0.000309262	0.000350771	0.000239171	0.000442525	-3.45182e-05	0.000249481		0.000550015	0.000464032	0.000109172	0.000196661	0.000526324	0.000495054	0.000373324	0.000191799	6.45912e-05	0.00169385
			10.1948	0.000524753	0.000322539	0.00156984	0.000426026	0.000277042	0.000493582	0.000336637	0.000455768	0.000457435	0.000656232		0.000320203	0.000347225	0.000260208	0.000221713	0.000475108	0.000250885	7.5678e-05	0.000261219	0.00036662	0.000502821			0.000238946	0.000408994	0.000171027	0.000430649	0.000346408	0.000347959	0.000130846	0.000498495	-3.254e-05	0.000238672		0.000412458	0.000314181	0.000291462	0.000211752	0.000473086	0.000418863	0.000373051	0.000152841	0.000101305	0.00159909
			14.725	0.00283175	0.0037003	0.00313255	0.00184628	0.00186815	0.00279212	0.00183064	0.0034789	0.0044731	0.00592968		0.00290003	0.00329054	0.00255706	0.00170463	0.00195548	0.00258069	0.00215703	0.00297254	0.00509002	0.00733438			0.0034603	0.00386199	0.00361196	0.00273253	0.00409781	0.00321396	0.00334103	0.00281436	0.0029195	0.00506172		0.00353496	0.00420732	0.00296698	0.00241547	0.003568	0.00305861	0.00265973	0.00486262	0.00551956	0.00727887
			19.1682	0.00256813	0.00307846	0.00267662	0.00179553	0.00167459	0.00246815	0.00175807	0.00317906	0.00391785	0.00526776		0.00362885	0.0039737	0.00286346	0.0021095	0.00232928	0.00301441	0.0026107	0.00351608	0.00551072	0.00715798			0.00330294	0.00352358	0.00351037	0.00261699	0.00370114	0.0030851	0.00318957	0.00247789	0.00261159	0.00440997		0.00389728	0.00436759	0.00324648	0.00264818	0.00392562	0.00344784	0.00301064	0.00489534	0.00528917	0.00757981
			23.6072	0.00230232	0.00271699	0.0022444	0.00163487	0.00136731	0.00224316	0.00141309	0.00285952	0.00366541	0.00476153		0.00354809	0.00364956	0.00265527	0.00201825	0.00223258	0.00279069	0.00239155	0.00314828	0.0055902	0.00688378			0.00302262	0.00317523	0.00327841	0.00239983	0.00340436	0.00291025	0.00293784	0.00223551	0.00246576	0.00402111		0.00354385	0.00381556	0.0028953	0.00241438	0.00346839	0.00318441	0.00267444	0.00470332	0.00510971	0.00737533
			28.1345	0.000224291	0.000559124	0.00134911	0.00060127	0.000132577	6.48611e-05	0.000357428	-6.74002e-05	-0.000190898	0.000261134		0.000661418	0.000597394	0.000792731	0.00082494	0.000435518	0.000480122	9.99619e-05	0.0004744	-0.000277545	0.000788923			0.000298956	-4.69498e-05	0.000209557	0.000583118	0.000177235	0.000189802	0.000525495	0.000455408	0.000124346	0.00016268		0.000786499	0.00124658	0.000471449	0.000647275	0.000796666	0.000733964	0.000567173	0.000335093	0.000306544	0.000466216
			32.5764	0.000152845	0.000382488	0.0012182	0.000527379	0.000100973	9.69608e-05	0.000250439	-4.97017e-05	-8.47683e-06	0.000397878		0.000621409	0.000675224	0.000664648	0.000644592	0.000412216	0.000513689	0.000186681	0.000513054	-0.000206832	0.000417893			0.000242078	3.51352e-05	0.000181409	0.000473299	0.00029912	0.000118076	0.000473598	0.000266485	0.000230524	-7.85491e-05		0.000886723	0.00111617	0.000466068	0.00062747	0.000884825	0.000788976	0.000556936	0.000383555	0.00031088	0.000316185
			37.0162	0.000206446	0.000322601	0.0012805	0.00045569	8.2504e-05	0.00019212	0.000249802	4.72854e-06	0.000115761	0.000463095		0.000664435	0.00069816	0.00071892	0.000576803	0.000496472	0.000524777	0.000265609	0.000552366	-4.41287e-05	0.000453666			0.000289303	0.000109755	0.00021965	0.000493725	0.000314797	0.000219183	0.000480124	0.000296443	0.000199442	-8.09734e-06		0.000947191	0.00111539	0.00053476	0.000649585	0.000872429	0.000832504	0.000639837	0.0004991	0.000467201	0.000504143
			41.5417	0.0050128	0.00551938	0.0047871	0.00433951	0.00399405	0.00542535	0.00405023	0.00516441	0.00924527	0.00584928		0.00715108	0.00842045	0.00511644	0.00415056	0.00408374	0.004673	0.00544445	0.00667046	0.00892922	0.00778003			0.00464209	0.00522777	0.00471875	0.00472975	0.00576278	0.00402944	0.00392028	0.00501729	0.00418867	0.00479626		0.00616753	0.00569535	0.00481838	0.00448248	0.00579323	0.00504996	0.00454997	0.00667852	0.00539375	0.00902661
			45.9833	0.00615502	0.00666321	0.00554945	0.00488906	0.00464023	0.00646213	0.00470415	0.00646682	0.0110128	0.00681116		0.00854315	0.00993855	0.00591254	0.00495122	0.0048562	0.00573895	0.00622891	0.00792314	0.0106312	0.00925163			0.00546375	0.0060938	0.00530303	0.00544231	0.00684136	0.00483842	0.00452728	0.00621311	0.00482131	0.00555283		0.00715487	0.00663993	0.00569942	0.00541343	0.00694341	0.00581413	0.00544384	0.00802268	0.006362	0.00994916
			50.4247	0.00658011	0.00706077	0.00570109	0.00506434	0.00482975	0.00685827	0.00482889	0.00696591	0.0119197	0.00702783		0.00899149	0.010388	0.00607903	0.00526174	0.00509395	0.00627241	0.00643254	0.00824939	0.0115847	0.0098699			0.00581139	0.00652829	0.00554977	0.00573699	0.00718258	0.00505358	0.00476843	0.00687798	0.00499904	0.00588197		0.00738058	0.00696118	0.00606661	0.0057819	0.00740914	0.00607107	0.00572625	0.00876757	0.00669618	0.0102013
			54.9453	0.00144302	0.00116942	0.00207538	0.00107007	0.000921613	0.00123379	0.00111484	0.000795561	0.00237282	0.00125031		0.00203195	0.00162621	0.00132439	0.00122896	0.00129323	0.00147913	0.00102769	0.00122839	0.00265938	0.00195709			0.000809583	0.00116527	0.000786367	0.00127077	0.00102353	0.000927001	0.000978413	0.00168487	0.00088246	0.000798436		0.00138962	0.00180557	0.00113822	0.0015544	0.0015467	0.00111927	0.00122847	0.00191397	0.00118826	0.00257138
			59.3894	0.000779017	0.00072852	0.00183995	0.000747948	0.000695748	0.000683819	0.00085482	0.000562886	0.00101462	0.000765467		0.00100766	0.000960881	0.000777589	0.00085258	0.000789438	0.000780744	0.000604758	0.000800983	0.00118423	0.000944671			0.000553322	0.000707326	0.000521096	0.000780566	0.000851319	0.000667891	0.00073244	0.000711927	0.000368343	0.000318366		0.000937364	0.00262274	0.000704967	0.00101987	0.00101622	0.000688507	0.000818003	0.000835327	0.000612369	0.00181647
			63.8401	0.0007393	0.000656001	0.00174328	0.000730932	0.000595109	0.000600691	0.000824127	0.000542646	0.000767281	0.000719833		0.000836801	0.000886276	0.000760281	0.000737404	0.000739633	0.000666828	0.000625257	0.000811318	0.000975196	0.000888983			0.000520578	0.000701667	0.00044921	0.000734844	0.000708489	0.000661217	0.000776557	0.00069716	0.000303263	0.000225209		0.000924436	0.00134299	0.00064253	0.000984356	0.00095641	0.000639149	0.000684165	0.000651728	0.000523342	0.00167608
	Complex Linked Resp. Avg/MTDR:			YMCE1	YMCE2	YMCE3	YMCE4	YMCE5	YMCE6	YMCE7	YMCE8	YMCE9	YMCE10														YFCE1	YFCE2	YFCE3	YFCE4	YFCE5	YFCE6	YFCE7	YFCE8	YFCE9	YFCE10
			CI	0.0025674	0.00316525	0.00268452	0.00175889	0.00163668	0.00250114	0.00166727	0.0031725	0.00401879	0.00531965													CI	0.00326195	0.00352027	0.00346692	0.00258312	0.00373443	0.00306977	0.00315615	0.00250925	0.00266562	0.0044976
			CII	0.00335899	0.00363793	0.00269193	0.00194413	0.00217245	0.00279526	0.00238643	0.0032123	0.00539698	0.00712538													CII	0.00365869	0.00413016	0.00303625	0.00249268	0.003654	0.00323029	0.00278161	0.00482043	0.00530615	0.00741134
			CIV	0.00707227	0.00799839	0.00552428	0.00477607	0.00458299	0.00590502	0.00528153	0.00690669	0.0105538	0.00776497													CIV	0.00610337	0.00619105	0.00535933	0.00526448	0.00665542	0.00514276	0.00482267	0.00692953	0.00541016	0.00756803
	MTDR (Mito. Content, RFU)/well:			YMCE1	YMCE2	YMCE3	YMCE4	YMCE5	YMCE6	YMCE7	YMCE8	YMCE9	YMCE10														YFCE1	YFCE2	YFCE3	YFCE4	YFCE5	YFCE6	YFCE7	YFCE8	YFCE9	YFCE10
			predicted MTDR in seahorse well	14682.8	16995.2	20081.8	20890.8	21761.8	19395.8	22110.6	17602.2	13101.6	13128.6													predicted MTDR in seahorse well	18598.2	17862.6	18902	17700.8	18982.6	20766.2	21078.4	14117	17137.6	13231.8
[truncated: 74 more columns]

## Sheet: Young-Cortex
SMAPLE INFORMATION:	All data from Seahorse Machine:		Time (minutes)	NADH-YMCO1			Succ/Rot-YMCO1			NADH-YMCO2			Succ/Rot-YMCO2			NADH-YMCO3			Succ/Rot-YMCO3			NADH-YMCO4			Succ/Rot-YMCO4			NADH-YMCO5			Succ/Rot-YMCO5			NADH-YMCO6			Succ/Rot-YMCO6			NADH-YMCO7			Succ/Rot-YMCO7			NADH-YMCO8			Succ/Rot-YMCO8
Tissue: Cerebral Cortex			1.30951	23.53	13.0882	12.2609	14.0547	17.655	31.4495	10.9632	15.9374	11.709	19.8633	24.6289	16.6831	30.8292	21.893	25.0631	20.796	25.1221	21.0678	17.3113	17.7427	16.4486	21.5544	16.7829	20.4759	19.1372	25.9753	20.9607	17.4089	19.9131	15.4999	17.1618	20.2142	14.5545	11.4955	13.2796	14.5907	9.71025	14.8567	18.7341	12.8752	17.2003	27.3114	2.68866	14.1668	14.9432	20.6013
Tissue prep: Frozen			5.75478	18.2263	13.2769	14.9584	17.3092	15.034	9.68229	11.843	14.7033	9.97845	19.7573	24.7618	22.6218	48.6108	18.5125	17.1462	15.6532	24.5982	24.826	21.3753	31.8401	14.391	18.5181	13.4078	18.5333	17.4322	25.0977	17.6729	18.8109	53.9445	14.5657	15.8574	18.3442	25.2518	15.6114	16.4742	11.8638	10.6616	8.74816	16.9143	15.4254	14.2673	40.8983	14.0976	17.6178	21.1576	18.0649
Entire region, bilateral			10.1948	17.3657	13.3717	12.5011	19.2039	14.7196	11.8451	12.9414	17.8171	11.5776	19.1894	22.3678	24.0868	62.3388	20.7186	15.4722	14.491	23.7664	27.3278	23.2638	33.1775	14.0959	19.495	13.2118	18.9209	17.8989	25.1585	19.3693	18.962	45.1164	16.5544	19.8828	18.4787	28.415	20.9012	17.8088	15.3383	15.7946	10.7372	16.0939	19.237	14.494	34.0626	21.0055	19.3256	26.2043	16.3796
2 mL 1X MAS used			14.725	92.3656	88.5005	106.274	106.969	124.526	99.4923	89.7686	85.8283	90.1006	119.228	121.764	118.501	107.523	68.5295	50.3347	60.0031	72.9498	65.2125	112.176	76.4523	77.9105	95.6014	96.417	106.712	102.083	120.395	114.136	108.801	100.062	132.824	150.452	151.875	142.52	111.893	123.937	107.834	72.041	64.0049	70.2735	105.656	95.0579	104.084	78.0065	91.4724	81.5346	101.377
7 ml homogenizer used			19.1682	85.8299	83.2437	96.9523	106.556	116.001	94.2658	85.7034	82.7379	86.1402	120.188	117.875	106.96	79.4827	59.3402	45.0541	67.6117	78.3963	66.2632	95.5419	72.1057	69.2528	100.996	98.5617	100.851	92.4649	110.628	104.416	108.653	97.9712	107.648	139.517	140.535	131.708	113.693	113.101	106.927	63.5433	54.7637	61.8671	99.3602	94.17	94.1447	73.2253	85.5187	70.6963	95.4694
Sex: male and female			23.6072	77.511	76.3056	87.44	91.2143	96.6171	76.6678	79.8306	77.2361	75.6176	103.039	98.4906	77.2152	60.5319	51.1378	50.6775	63.2768	71.563	59.3947	85.0398	65.6656	64.0525	84.3652	84.0697	83.1681	84.0763	99.9934	94.3006	93.6916	84.1866	85.118	125.424	124.13	117.62	96.9422	91.2812	88.1819	57.4687	48.3285	54.8596	82.5252	80.0298	79.3193	66.4611	78.0341	62.8901	77.4335
Strain: C57BL/6J			28.1345	7.86355	7.37274	11.4382	17.2014	24.3798	13.0524	3.13969	16.5149	2.14477	28.2618	17.4432	14.7624	27.334	9.27406	6.0894	20.5944	25.4432	23.6042	3.73836	10.7881	0.969153	20.1987	16.3224	24.4023	2.98749	10.4715	4.88004	22.2733	18.1414	20.2438	0.40945	9.85716	-5.39159	13.3533	16.186	15.4128	4.43985	-1.77664	-1.4218	19.1042	14.7554	23.2832	5.00195	6.95404	7.72959	22.4016
Diet: Standard Chow			32.5764	9.39306	5.15742	10.65	17.0878	23.0171	18.674	2.93682	13.9687	5.48802	24.8431	17.6167	19.8803	26.4618	8.08051	7.33648	25.2198	24.5403	23.3152	6.00882	11.4429	4.6499	19.4689	15.749	29.1357	4.23018	10.9157	8.56551	25.5071	19.6208	19.7614	2.33361	10.7393	-0.910787	16.1094	18.1717	19.1554	4.12024	-5.30056	0.673864	20.4878	13.839	22.2366	2.3731	8.65528	6.61782	17.7582
Age: 10 weeks			37.0162	9.57637	6.53015	15.2475	17.5065	22.3523	18.3625	1.67792	7.05185	12.932	23.5562	18.2181	23.5061	26.517	8.70103	10.661	24.6584	24.0969	20.5205	7.39564	11.0265	4.34063	20.62	16.6691	26.768	4.6998	12.0836	9.97502	28.2863	19.4559	20.2109	5.82904	10.8168	0.375565	18.6911	20.6523	19.9132	3.54666	-4.53905	2.98438	23.3008	13.5653	21.4309	2.18463	8.48739	6.3989	19.5438
Protein used: 6 ug/well			41.5417	102.506	111.089	122.416	168.407	167.835	165.336	115.666	99.6845	105.782	200.289	194.724	184.941	98.7312	68.22	87.8112	104.158	109.541	100.812	192.416	125.463	121.601	166.724	148.994	152.53	159.861	185.249	168.553	176.2	177.02	187.388	194.571	183.811	195.051	186.719	195.099	158.473	108.382	98.3871	110.258	160.169	161.416	143.017	80.4838	107.613	84.2975	177.941
			45.9833	117.962	123.04	147.282	198.555	188.565	179.054	142.756	111.237	115.31	223.294	217.499	201.53	112.607	78.0995	92.7982	115.623	118.64	107.616	234.165	142.764	135.485	192.623	167.609	170.059	194.234	212.525	192.293	210.25	200.857	203.524	232.202	208.605	216.418	209.477	212.5	175.343	120.06	110.002	127.37	173.319	176.586	156.955	90.9901	116.975	91.5177	192.629
SHEET LEGEND:			50.4247	120.077	125.873	151.334	200.389	191.012	178.136	146.564	110.965	119.565	224.953	220.883	202.184	111.12	78.1473	100.035	109.162	118.995	105.808	247.997	146.041	135.91	196.933	169.388	170.658	201.813	218.928	195.596	213.653	201.299	198.985	242.55	213.348	218.151	212.865	213.855	177.068	120.589	110.552	126.102	172.451	175.249	155.452	90.6842	117.064	90.9836	191.181
YM = Young Male			54.9453	17.6346	15.5967	11.9384	18.9524	18.5471	16.6888	15.1926	7.75476	6.27952	27.4625	21.4048	21.5611	39.5595	13.8015	14.8827	12.2139	16.2342	15.7486	13.0544	12.0643	10.6623	24.1551	12.7735	17.2591	20.1802	20.969	19.7387	26.706	18.7803	13.7341	21.0591	23.1586	16.8665	22.488	23.349	24.2641	5.59672	3.29839	1.78155	17.5162	14.4108	16.0272	7.18421	11.5235	43.5168	16.1589
YF = Young Female			59.3894	15.1526	12.8568	12.7495	13.7303	14.4439	13.2716	13.0833	9.03693	7.37348	23.2732	18.1777	18.1884	36.9309	11.6593	17.5726	11.3054	13.4689	12.9701	17.4235	11.6318	12.0369	16.3917	9.7086	15.3915	19.9089	19.4055	18.5145	22.9628	14.7396	12.7961	20.2268	21.736	18.391	16.5837	19.141	17.7212	14.4657	4.48415	4.86128	15.8629	13.021	13.2007	7.90256	11.379	34.6314	13.0554
OM = Old Male			63.8401	15.982	15.8394	14.9255	17.5795	18.4698	16.7488	16.2258	11.6035	12.0759	25.215	20.3324	21.0191	38.8384	12.8854	24.3775	14.3113	16.4005	16.2753	23.2238	13.0588	15.6226	20.4129	13.9386	18.0891	23.166	22.4472	21.5127	29.7754	18.4501	16.7454	24.3484	24.1755	22.3576	19.693	21.0576	21.0722	8.07937	6.31103	8.45089	23.2385	17.0352	17.0008	9.20646	13.224	32.3387	15.813
OF = Old Female
CO = Cerebral Cortex	Biological Sample Average:		Time (minutes)	NADH-YMCO1	NADH-YMCO2	NADH-YMCO3	NADH-YMCO4	NADH-YMCO5	NADH-YMCO6	NADH-YMCO7	NADH-YMCO8	NADH-YMCO9	NADH-YMCO10		Succ/Rot-YMCO1	Succ/Rot-YMCO2	Succ/Rot-YMCO3	Succ/Rot-YMCO4	Succ/Rot-YMCO5	Succ/Rot-YMCO6	Succ/Rot-YMCO7	Succ/Rot-YMCO8	Succ/Rot-YMCO9	Succ/Rot-YMCO10			NADH-YFCO1	NADH-YFCO2	NADH-YFCO3	NADH-YFCO4	NADH-YFCO5	NADH-YFCO6	NADH-YFCO7	NADH-YFCO8	NADH-YFCO9	NADH-YFCO10		Succ/Rot-YFCO1	Succ/Rot-YFCO2	Succ/Rot-YFCO3	Succ/Rot-YFCO4	Succ/Rot-YFCO5	Succ/Rot-YFCO6	Succ/Rot-YFCO7	Succ/Rot-YFCO8	Succ/Rot-YFCO9	Succ/Rot-YFCO10
1, 2, 3…10 = sample number	(the average of three technical replicates per biological sample)		1.30951	16.293	12.8699	25.9284	17.1676	22.0244	17.3102	14.4337	10.5996	4.55344	5.87171		21.0531	20.3917	22.3287	19.6044	17.6073	13.122	19.129	22.0596	6.14249	1.74824			13.8064	18.7265	23.2534	20.3825	23.2271	19.7584	23.6379	4.44744	4.57189	0.263208		42.5125	42.4737	20.7892	22.3914	19.6996	21.3179	23.0751	8.84979	5.37513	3.15731
MTDR = mitoTracker Deep Red			5.75478	15.4872	12.1749	28.0898	22.5355	20.0676	19.8178	12.108	17.6243	3.24148	6.70321		14.0085	22.3803	21.6924	16.8197	29.1071	14.6498	23.5303	19.4254	5.37784	7.32798			13.7528	15.6468	22.8448	15.8896	19.0828	27.112	21.5789	8.66441	9.65503	2.04634		38.3902	33.9383	18.7286	19.4472	20.3719	20.5454	19.4177	7.2664	5.32829	2.32565
			10.1948	14.4128	14.112	32.8432	23.5124	20.8089	22.2588	14.2086	22.1785	3.27527	5.73491		15.2562	21.8813	21.8617	17.2092	26.8776	18.0161	22.5978	19.1287	4.71545	10.1419			17.6607	17.1172	22.5131	15.9472	17.4223	24.1248	22.2531	8.4447	13.8452	2.06015		42.9913	31.0135	18.6739	19.3764	19.6913	20.5084	19.2196	9.42154	5.87861	1.96779
			14.725	95.7133	88.5658	75.4623	88.8462	112.204	148.283	68.7732	83.6712	25.7697	83.003		110.329	119.831	66.0551	99.5769	113.896	114.555	101.599	104.909	25.5467	103.474			80.3098	101.796	141.021	82.3132	107.811	74.5036	104.196	39.0805	49.0367	90.5025		140.516	125.147	132.097	94.8201	141.863	101.157	123.01	49.2009	55.1905	68.7182
			19.1682	88.6753	84.8605	61.2923	78.9668	102.503	137.253	60.058	76.4801	22.6733	73.3633		105.607	115.008	70.7571	100.136	104.757	111.241	95.8916	96.9102	27.8455	110.127			75.4785	91.6252	128.514	73.7785	100.512	63.9213	92.616	38.1985	42.3495	81.8391		128.484	112.716	116.467	94.6797	121.908	96.5622	107.056	50.7073	62.4143	75.9861
			23.6072	80.4188	77.5615	54.1157	71.586	92.7901	122.391	53.5523	69.1284	20.5891	65.6113		88.1664	92.9149	64.7448	83.8677	87.6654	92.1351	80.6248	79.0809	28.671	111.769			69.6873	82.1414	115.369	65.4574	91.6023	62.1607	83.4884	36.0553	39.7839	74.6095		108.803	90.7592	94.741	81.4599	95.9069	83.2134	88.1977	50.5773	64.6307	75.2107
			28.1345	8.89149	7.26645	14.2325	5.16521	6.11302	1.62501	0.413804	6.56186	2.16319	4.70659		18.2112	20.1558	23.2139	20.3078	20.2195	14.984	19.0476	22.1676	0.965622	3.64235			2.69195	8.6963	8.84956	4.52176	4.84108	16.2906	4.24779	5.03678	-5.63686	-1.95707		57.0726	31.323	19.4729	23.765	29.4138	22.2351	33.4918	7.23103	-3.52327	5.43366
			32.5764	8.40016	7.4645	13.9596	7.36721	7.9038	4.05406	-0.168817	5.88206	2.37344	5.22706		19.593	20.78	24.3584	21.4512	21.6298	17.8122	18.8544	20.1953	1.64202	5.58476			0.241666	6.48551	9.20185	3.92742	3.83082	8.98945	5.96165	6.39908	-4.4856	-1.13305		56.0946	28.5715	21.7193	24.325	25.6997	22.269	31.2258	9.05918	-1.75217	5.16026
			37.0162	10.4513	7.22058	15.293	7.58757	8.91946	5.67381	0.663995	5.6903	2.06132	6.49866		19.4071	21.7602	23.0919	21.3524	22.6511	19.7522	19.4323	21.4419	2.89134	7.6753			1.24016	6.92595	12.9257	4.43593	4.44116	8.78873	7.33921	5.90898	-3.50856	0.986486		57.1552	27.8431	23.9052	24.2324	25.5809	22.8283	34.7233	9.60371	-0.150899	6.39176
			41.5417	112.004	107.044	84.9208	146.493	171.221	191.145	105.675	90.7983	89.8768	126.066		167.193	193.318	104.837	156.083	180.203	180.097	154.867	173.652	99.4476	174.06			87.0964	125.882	163.194	116.284	122.389	110.048	167.055	116.916	112.821	140.69		162.214	161.843	218.342	134.959	179.381	151.595	160.985	128.882	123.861	146.249
			45.9833	129.428	123.101	94.5015	170.805	199.684	219.075	119.144	99.8278	109.646	150.271		188.725	214.108	113.96	176.764	204.877	199.107	168.954	187.998	125.704	206.603			99.203	139.309	181.074	127.555	139.786	124.626	186.955	142.288	135.94	165.885		175.122	178.543	243.695	145.656	194.326	165.908	179.55	155.794	152.319	175.097
			50.4247	132.428	125.698	96.4341	176.649	205.446	224.683	119.081	99.5773	115.94	160.467		189.846	216.006	111.322	178.993	204.646	201.262	167.717	186.158	136.012	219.247			100.601	138.159	180.731	127.204	141.177	125.503	188.284	151.252	147.463	174.916		170.065	177.339	245.527	145.693	194.072	164.733	181.035	165.162	162.542	186.764
			54.9453	15.0566	9.74229	22.7479	11.927	20.296	20.3614	3.55889	20.7415	27.6992	30.9937		18.0628	23.4761	14.7323	18.0626	19.7402	23.367	15.9847	17.6506	38.8258	40.9702			11.612	13.6703	30.2543	11.255	11.6818	14.4257	17.0127	37.1768	27.5528	31.0861		52.5637	23.7986	22.6091	19.597	20.9457	16.2172	26.9497	41.542	37.5914	34.711
			59.3894	13.5863	9.83125	22.0543	13.6974	19.2763	20.1179	7.93704	17.971	13.8686	18.3059		13.8153	19.8798	12.5815	13.8306	16.8328	17.8153	14.0282	14.4548	13.7788	21.917			11.692	13.8897	28.9548	10.4211	12.5062	15.4635	17.3166	16.5464	12.8937	16.5106		46.9337	23.262	19.7559	17.3049	19.579	14.3729	24.2219	21.5065	18.3234	18.6896
			63.8401	15.5823	13.3017	25.3671	17.3017	22.3753	23.6272	7.61376	18.2564	12.2237	14.6351		17.5994	22.1889	15.6624	17.4802	21.657	20.6076	19.0915	17.776	10.8834	19.3108			13.7435	16.3686	29.6316	13.0279	15.2546	17.8936	20.1666	13.6307	10.8795	13.8998		48.3299	23.7766	23.6967	19.7842	22.1434	18.1975	27.5001	18.4395	15.2296	18.6337
	Complex Linked Resp. Averages:			YMCO1	YMCO2	YMCO3	YMCO4	YMCO5	YMCO6	YMCO7	YMCO8	YMCO9	YMCO10														YFCO1	YFCO2	YFCO3	YFCO4	YFCO5	YFCO6	YFCO7	YFCO8	YFCO9	YFCO10
	(average of three consectutive time points)		CI	88.2692	83.6626	63.6235	79.7996	102.499	135.976	60.7945	76.4266	23.0107	73.9925													CI	75.1585	91.854	128.301	73.8497	99.9751	66.8619	93.4335	37.7781	43.7234	82.317
			CII	101.368	109.251	67.1857	94.5269	102.106	105.977	92.7052	93.6333	27.3544	108.456													CII	125.934	109.541	114.435	90.3199	119.893	93.6442	106.088	50.1619	60.7452	73.305
			CIV	153.271	163.213	100.996	167.631	194.346	202.562	139.24	139.669	112.771	172.786													CIV	132.383	153.512	205.427	132.892	161.855	140.402	177.31	143.382	139.158	164.934
	Biological Sample Avg/ug pro:		Time (minutes)	NADH-YMCO1	NADH-YMCO2	NADH-YMCO3	NADH-YMCO4	NADH-YMCO5	NADH-YMCO6	NADH-YMCO7	NADH-YMCO8	NADH-YMCO9	NADH-YMCO10		Succ/Rot-YMCO1	Succ/Rot-YMCO2	Succ/Rot-YMCO3	Succ/Rot-YMCO4	Succ/Rot-YMCO5	Succ/Rot-YMCO6	Succ/Rot-YMCO7	Succ/Rot-YMCO8	Succ/Rot-YMCO9	Succ/Rot-YMCO10			NADH-YFCO1	NADH-YFCO2	NADH-YFCO3	NADH-YFCO4	NADH-YFCO5	NADH-YFCO6	NADH-YFCO7	NADH-YFCO8	NADH-YFCO9	NADH-YFCO10		Succ/Rot-YFCO1	Succ/Rot-YFCO2	Succ/Rot-YFCO3	Succ/Rot-YFCO4	Succ/Rot-YFCO5	Succ/Rot-YFCO6	Succ/Rot-YFCO7	Succ/Rot-YFCO8	Succ/Rot-YFCO9	Succ/Rot-YFCO10
			1.30951	2.71551	2.14498	4.32141	2.86126	3.67073	2.88503	2.40562	1.7666	0.758906	0.978618		3.50884	3.39862	3.72144	3.2674	2.93455	2.18699	3.18816	3.67661	1.02375	0.291373			2.30106	3.12108	3.87557	3.39708	3.87118	3.29307	3.93964	0.741241	0.761982	0.0438679		7.08541	7.07896	3.46486	3.7319	3.28327	3.55298	3.84585	1.47497	0.895856	0.526219
			5.75478	2.5812	2.02915	4.68163	3.75591	3.3446	3.30297	2.018	2.93739	0.540246	1.1172		2.33475	3.73005	3.61541	2.80329	4.85118	2.44163	3.92172	3.23757	0.896306	1.22133			2.29214	2.6078	3.80747	2.64827	3.18046	4.51867	3.59648	1.44407	1.60917	0.341057		6.39837	5.65639	3.12143	3.24121	3.39531	3.42423	3.23628	1.21107	0.888049	0.387608
			10.1948	2.40214	2.35201	5.47387	3.91873	3.46815	3.7098	2.36809	3.69641	0.545879	0.955818		2.5427	3.64689	3.64362	2.8682	4.4796	3.00268	3.76631	3.18811	0.785908	1.69031			2.94344	2.85286	3.75218	2.65786	2.90372	4.0208	3.70885	1.40745	2.30753	0.343359		7.16522	5.16892	3.11232	3.2294	3.28188	3.41807	3.20327	1.57026	0.979769	0.327965
			14.725	15.9522	14.761	12.577	14.8077	18.7007	24.7138	11.4622	13.9452	4.29496	13.8338		18.3882	19.9719	11.0092	16.5961	18.9826	19.0925	16.9332	17.4848	4.25778	17.2456			13.385	16.9659	23.5035	13.7189	17.9686	12.4173	17.366	6.51341	8.17278	15.0837		23.4194	20.8579	22.0162	15.8033	23.6438	16.8595	20.5017	8.20015	9.19841	11.453
			19.1682	14.7792	14.1434	10.2154	13.1611	17.0838	22.8755	10.0097	12.7467	3.77888	12.2272		17.6012	19.168	11.7928	16.6894	17.4596	18.5401	15.9819	16.1517	4.64092	18.3545			12.5798	15.2709	21.4189	12.2964	16.7519	10.6536	15.436	6.36642	7.05824	13.6398		21.414	18.786	19.4111	15.7799	20.3181	16.0937	17.8426	8.45121	10.4024	12.6644
			23.6072	13.4031	12.9269	9.01929	11.931	15.465	20.3985	8.92538	11.5214	3.43152	10.9352		14.6944	15.4858	10.7908	13.9779	14.6109	15.3559	13.4375	13.1802	4.77849	18.6281			11.6145	13.6902	19.2281	10.9096	15.2671	10.3601	13.9147	6.00921	6.63066	12.4349		18.1338	15.1265	15.7902	13.5766	15.9845	13.8689	14.6996	8.42956	10.7718	12.5351
			28.1345	1.48191	1.21108	2.37208	0.860868	1.01884	0.270835	0.0689674	1.09364	0.360532	0.784432		3.0352	3.3593	3.86898	3.38463	3.36992	2.49734	3.1746	3.6946	0.160937	0.607059			0.448658	1.44938	1.47493	0.753627	0.806846	2.71511	0.707965	0.839463	-0.939477	-0.326179		9.51209	5.22049	3.24549	3.96083	4.9023	3.70585	5.58197	1.20517	-0.587211	0.905611
			32.5764	1.40003	1.24408	2.3266	1.22787	1.3173	0.675676	-0.0281362	0.980344	0.395573	0.871177		3.26549	3.46334	4.05973	3.5752	3.60496	2.9687	3.14241	3.36588	0.273671	0.930794			0.0402777	1.08092	1.53364	0.654571	0.63847	1.49824	0.993608	1.06651	-0.747601	-0.188841		9.34909	4.76192	3.61989	4.05417	4.28328	3.7115	5.2043	1.50986	-0.292028	0.860043
			37.0162	1.74189	1.20343	2.54883	1.2646	1.48658	0.945635	0.110666	0.948384	0.343553	1.08311		3.23452	3.62669	3.84865	3.55873	3.77518	3.29204	3.23872	3.57365	0.48189	1.27922			0.206694	1.15433	2.15429	0.739322	0.740193	1.46479	1.2232	0.98483	-0.58476	0.164414		9.52586	4.64052	3.98419	4.03874	4.26349	3.80472	5.78721	1.60062	-0.0251498	1.06529
			41.5417	18.6673	17.8407	14.1535	24.4156	28.5368	31.8574	17.6126	15.133	14.9795	21.0111		27.8654	32.2197	17.4729	26.0138	30.0338	30.0162	25.8112	28.942	16.5746	29.0101			14.5161	20.9804	27.199	19.3806	20.3982	18.3414	27.8425	19.486	18.8035	23.4483		27.0357	26.9738	36.3903	22.4932	29.8968	25.2658	26.8308	21.4803	20.6435	24.3748
			45.9833	21.5714	20.5168	15.7503	28.4675	33.2807	36.5126	19.8573	16.638	18.2743	25.0451		31.4541	35.6846	18.9933	29.4606	34.1462	33.1844	28.1589	31.333	20.9506	34.4339			16.5338	23.2181	30.179	21.2592	23.2976	20.771	31.1591	23.7146	22.6567	27.6475		29.187	29.7572	40.6158	24.276	32.3877	27.6514	29.9249	25.9657	25.3865	29.1829
			50.4247	22.0713	20.9497	16.0723	29.4415	34.2409	37.4472	19.8469	16.5962	19.3233	26.7445		31.641	36.0011	18.5536	29.8321	34.1076	33.5437	27.9529	31.0264	22.6687	36.5412			16.7668	23.0265	30.1219	21.2007	23.5296	20.9171	31.3807	25.2087	24.5772	29.1527		28.3441	29.5564	40.9212	24.2821	32.3453	27.4555	30.1724	27.527	27.0903	31.1273
			54.9453	2.50943	1.62371	3.79131	1.98783	3.38266	3.39357	0.593148	3.45692	4.61653	5.16561		3.01046	3.91269	2.45538	3.01043	3.29003	3.89451	2.66412	2.94176	6.47097	6.82836			1.93534	2.27839	5.04238	1.87584	1.94697	2.40429	2.83544	6.19614	4.59214	5.18102		8.76062	3.96644	3.76819	3.26616	3.49095	2.70287	4.49162	6.92366	6.26524	5.78517
			59.3894	2.26439	1.63854	3.67571	2.2829	3.21272	3.35299	1.32284	2.99516	2.31143	3.05099		2.30255	3.3133	2.09691	2.3051	2.80547	2.96922	2.33803	2.40914	2.29646	3.65283			1.94866	2.31495	4.8258	1.73685	2.08437	2.57726	2.8861	2.75773	2.14894	2.75177		7.82228	3.877	3.29266	2.88415	3.26317	2.39548	4.03698	3.58442	3.05389	3.11493
			63.8401	2.59705	2.21695	4.22786	2.88362	3.72921	3.93786	1.26896	3.04273	2.03728	2.43918		2.93323	3.69814	2.6104	2.91337	3.6095	3.4346	3.18192	2.96267	1.81391	3.21847			2.29059	2.72811	4.9386	2.17131	2.54243	2.98227	3.36111	2.27178	1.81325	2.31663		8.05498	3.96276	3.94944	3.29736	3.69056	3.03291	4.58335	3.07325	2.53826	3.10561
	Complex Linked Resp. Avg/ug pro:			YMCO1	YMCO2	YMCO3	YMCO4	YMCO5	YMCO6	YMCO7	YMCO8	YMCO9	YMCO10														YFCO1	YFCO2	YFCO3	YFCO4	YFCO5	YFCO6	YFCO7	YFCO8	YFCO9	YFCO10
			CI	14.7115	13.9438	10.6039	13.2999	17.0832	22.6626	10.1324	12.7378	3.83512	12.3321													CI	12.5264	15.309	21.3835	12.3083	16.6625	11.1436	15.5722	6.29635	7.28723	13.7195
			CII	16.8946	18.2086	11.1976	15.7545	17.0177	17.6628	15.4509	15.6056	4.55906	18.0761													CII	20.9891	18.2568	19.0725	15.0533	19.9821	15.6074	17.6813	8.36031	10.1242	12.2175
			CIV	25.5451	27.2021	16.8326	27.9385	32.391	33.7603	23.2066	23.2781	18.7952	28.7976													CIV	22.0639	25.5854	34.2379	22.1486	26.9759	23.4004	29.5517	23.897	23.193	27.4889
	Biological Sample Avg/MTDR:		Time (minutes)	NADH-YMCO1	NADH-YMCO2	NADH-YMCO3	NADH-YMCO4	NADH-YMCO5	NADH-YMCO6	NADH-YMCO7	NADH-YMCO8	NADH-YMCO9	NADH-YMCO10		Succ/Rot-YMCO1	Succ/Rot-YMCO2	Succ/Rot-YMCO3	Succ/Rot-YMCO4	Succ/Rot-YMCO5	Succ/Rot-YMCO6	Succ/Rot-YMCO7	Succ/Rot-YMCO8	Succ/Rot-YMCO9	Succ/Rot-YMCO10			NADH-YFCO1	NADH-YFCO2	NADH-YFCO3	NADH-YFCO4	NADH-YFCO5	NADH-YFCO6	NADH-YFCO7	NADH-YFCO8	NADH-YFCO9	NADH-YFCO10		Succ/Rot-YFCO1	Succ/Rot-YFCO2	Succ/Rot-YFCO3	Succ/Rot-YFCO4	Succ/Rot-YFCO5	Succ/Rot-YFCO6	Succ/Rot-YFCO7	Succ/Rot-YFCO8	Succ/Rot-YFCO9	Succ/Rot-YFCO10
			1.30951	0.000691814	0.000536737	0.00119886	0.000712684	0.000928743	0.000683009	0.00065668	0.000494494	0.000337487	0.000238554		0.000893928	0.000850435	0.00103241	0.000813847	0.000742479	0.000517754	0.000870298	0.00102913	0.000455263	7.10268e-05			0.000524211	0.000730522	0.000849565	0.000842774	0.000953462	0.000838315	0.000982667	0.000363787	0.000258506	7.68925e-06		0.00161415	0.0016569	0.000759532	0.000925838	0.000808661	0.000904481	0.000959273	0.000723886	0.000303924	9.22366e-05
			5.75478	0.000657597	0.000507753	0.00129879	0.000935525	0.000846227	0.000781953	0.00055087	0.000822214	0.000240248	0.000272335		0.000594811	0.000933369	0.001003	0.000698244	0.00122741	0.000578037	0.00107054	0.00090624	0.000398588	0.000297718			0.000522179	0.000610384	0.000834636	0.000657002	0.00078334	0.00115032	0.000897072	0.000708722	0.00054592	5.97811e-05		0.00145763	0.00132394	0.00068425	0.000804103	0.000836256	0.000871705	0.000807227	0.000594369	0.000301275	6.79406e-05
			10.1948	0.000611979	0.000588541	0.00151858	0.00097608	0.000877487	0.000878267	0.000646437	0.00103467	0.000242753	0.000232996		0.000647789	0.000912558	0.00101083	0.000714414	0.0011334	0.000710863	0.00102812	0.000892396	0.000349494	0.000412039			0.000670555	0.000667742	0.000822516	0.000659383	0.000715179	0.00102357	0.0009251	0.000690751	0.000782841	6.01846e-05		0.00163233	0.00120984	0.000682252	0.000801174	0.000808318	0.000870137	0.000798992	0.000770653	0.000332392	5.74864e-05
			14.725	0.00406405	0.00369363	0.00348917	0.00368831	0.00473153	0.0058508	0.00312893	0.00390345	0.00190997	0.00337221		0.00468465	0.00499755	0.00305421	0.00413378	0.00480284	0.00451999	0.0046224	0.00489423	0.00189344	0.00420388			0.00304927	0.00397105	0.0051522	0.00340348	0.00442561	0.00316106	0.00433161	0.00319666	0.00277266	0.00264391		0.00533523	0.00488201	0.00482618	0.00392061	0.00582341	0.00429192	0.00511374	0.00402448	0.00312061	0.00200751
			19.1682	0.00376521	0.0035391	0.00283399	0.00327818	0.00432242	0.00541561	0.00273242	0.00356797	0.00168047	0.00298058		0.00448417	0.00479639	0.00327161	0.00415699	0.00441749	0.00438922	0.00436272	0.00452108	0.00206383	0.00447419			0.00286583	0.00357431	0.00469525	0.00305059	0.00412596	0.00271207	0.00385021	0.00312452	0.00239455	0.00239082		0.0048784	0.00439706	0.00425511	0.00391481	0.00500429	0.00409697	0.00445049	0.0041477	0.00352906	0.00221983
			23.6072	0.00341464	0.00323469	0.00250216	0.00297178	0.00391285	0.0048292	0.00243643	0.003225	0.001526	0.00266563		0.0037436	0.00387501	0.00299362	0.00348163	0.00369675	0.00363538	0.00366813	0.0036893	0.002125	0.0045409			0.00264594	0.00320434	0.00421499	0.00270653	0.00376023	0.00263737	0.00347076	0.00294921	0.00224949	0.00217961		0.00413112	0.00354052	0.00346136	0.0033682	0.00393694	0.0035306	0.00366653	0.00413707	0.00365438	0.00219718
			28.1345	0.000377539	0.000303047	0.000658071	0.000214425	0.000257779	6.4118e-05	1.88266e-05	0.000306125	0.000160329	0.000191218		0.00077326	0.000840597	0.00107335	0.000843046	0.000852633	0.000591226	0.000866595	0.00103417	7.15689e-05	0.00014798			0.00010221	0.000339243	0.000323319	0.000186966	0.000198724	0.000691184	0.000176588	0.000411993	-0.000318722	-5.71732e-05		0.00216698	0.00122191	0.000711444	0.000982634	0.00120742	0.000943397	0.00139231	0.000591476	-0.000199214	0.000158737
			32.5764	0.000356677	0.000311306	0.000645453	0.000305838	0.000333294	0.000159961	-7.68055e-06	0.000274411	0.000175912	0.000212363		0.000831931	0.000866629	0.00112626	0.000890513	0.000912101	0.000702816	0.000857807	0.000942154	0.000121702	0.000226896			9.17577e-06	0.000253	0.00033619	0.000162391	0.000157254	0.000381407	0.000247836	0.000523425	-0.000253627	-3.31004e-05		0.00212984	0.00111458	0.000793517	0.00100579	0.00105496	0.000944836	0.00129811	0.000741013	-9.90721e-05	0.00015075
			37.0162	0.000443771	0.000301134	0.000707106	0.000314986	0.000376123	0.000223872	3.02093e-05	0.000265465	0.000152778	0.000264025		0.000824039	0.000907505	0.00106771	0.000886409	0.000955169	0.000779365	0.0008841	0.00100031	0.000214297	0.000311829			4.70875e-05	0.000270182	0.000472241	0.000183417	0.000182308	0.00037289	0.000305104	0.000483336	-0.000198383	2.88188e-05		0.00217012	0.00108616	0.000873376	0.00100196	0.00105009	0.000968566	0.00144351	0.000785554	-8.53219e-06	0.000186726
			41.5417	0.00475576	0.00446426	0.0039265	0.00608144	0.00722018	0.007542	0.00480785	0.00423594	0.00666139	0.00512178		0.00709911	0.00806231	0.00484738	0.00647952	0.00759894	0.00710611	0.0070459	0.00810125	0.00737075	0.00707166			0.00330695	0.00491068	0.00596231	0.00480809	0.00502402	0.00466915	0.00694476	0.00956336	0.00637917	0.00411006		0.00615908	0.0063135	0.00797711	0.00558028	0.0073635	0.00643191	0.00669242	0.0105421	0.00700343	0.00427246
			45.9833	0.00549561	0.00513392	0.00436949	0.00709069	0.00842044	0.00864407	0.00542061	0.00465719	0.00812661	0.00610514		0.00801338	0.00892933	0.00526918	0.00733806	0.00863943	0.00785616	0.00768676	0.00877053	0.00931676	0.00839379			0.00376662	0.00543444	0.00661554	0.00527416	0.00573814	0.00528766	0.00777204	0.0116387	0.00768642	0.00484611		0.00664918	0.00696499	0.00890339	0.00602257	0.007977	0.0070392	0.00746419	0.0127435	0.00861251	0.00511523
			50.4247	0.00562298	0.00524222	0.00445884	0.00733331	0.0086634	0.00886533	0.00541775	0.0046455	0.00859312	0.00651939		0.00806098	0.00900853	0.0051472	0.0074306	0.00862968	0.00794123	0.00763051	0.00868471	0.0100808	0.0089075			0.00381969	0.00538958	0.00660303	0.00525964	0.00579527	0.00532487	0.00782731	0.012372	0.00833794	0.00510994		0.00645716	0.00691799	0.00897034	0.00602409	0.00796656	0.00698933	0.00752592	0.0135098	0.00919053	0.00545604
			54.9453	0.000639313	0.000406301	0.0010518	0.00049513	0.000855857	0.000803401	0.000161916	0.000967637	0.00205298	0.0012592		0.000766958	0.000979069	0.000681179	0.000749839	0.000832419	0.000921995	0.000727247	0.000823439	0.00287765	0.00166452			0.000440895	0.00053328	0.00110534	0.000465373	0.000479534	0.000612058	0.000707246	0.00304095	0.00155791	0.000908138		0.00199578	0.000928387	0.000826025	0.000810294	0.000859811	0.000688069	0.00112035	0.00339801	0.00212552	0.00101403
			59.3894	0.000576884	0.000410011	0.00101973	0.000568626	0.000812859	0.000793795	0.000361106	0.000838386	0.0010279	0.000743726		0.000586606	0.000829084	0.000581732	0.000574155	0.000709821	0.000702939	0.000638231	0.00067435	0.00102124	0.000890435			0.00044393	0.000541838	0.00105786	0.000430892	0.000513375	0.000656091	0.000719882	0.00135344	0.000729041	0.000482335		0.00178202	0.000907452	0.000721783	0.000715522	0.000803711	0.000609816	0.00100695	0.00175917	0.00103605	0.000545991
			63.8401	0.000661635	0.000554747	0.00117291	0.000718254	0.000943539	0.000932258	0.000346398	0.0008517	0.000905981	0.000594589		0.000747281	0.000925384	0.000724185	0.000725663	0.00091325	0.000813116	0.000868593	0.000829291	0.000806647	0.000784552			0.000521826	0.000638542	0.00108259	0.000538676	0.000626194	0.000759196	0.000838362	0.00111495	0.000615153	0.000406062		0.00183503	0.000927526	0.000865758	0.000818035	0.000908976	0.000772087	0.00114323	0.0015083	0.000861119	0.000544358
	Complex Linked Resp. Avg/MTDR:			YMCO1	YMCO2	YMCO3	YMCO4	YMCO5	YMCO6	YMCO7	YMCO8	YMCO9	YMCO10														YFCO1	YFCO2	YFCO3	YFCO4	YFCO5	YFCO6	YFCO7	YFCO8	YFCO9	YFCO10
			CI	0.00374797	0.00348914	0.00294177	0.00331276	0.00432227	0.0053652	0.00276593	0.00356547	0.00170548	0.00300614													CI	0.00285368	0.00358323	0.00468748	0.00305353	0.00410394	0.00283683	0.00388419	0.00309013	0.00247223	0.00240478
			CII	0.00430414	0.00455631	0.00310648	0.00392413	0.00430569	0.00418153	0.00421775	0.0043682	0.00202742	0.00440633													CII	0.00478158	0.0042732	0.00418089	0.00373454	0.00492154	0.00397316	0.00441025	0.00410308	0.00343469	0.00214151
			CIV	0.00650797	0.00680676	0.00466976	0.00695894	0.00819535	0.00799248	0.0063349	0.00651585	0.00835824	0.00701988													CIV	0.00502644	0.00598853	0.00750528	0.0054948	0.00664408	0.00595702	0.00737111	0.0117282	0.00786833	0.00481831
	MTDR (Mito. Content, RFU)/well:			YMCO1	YMCO2	YMCO3	YMCO4	YMCO5	YMCO6	YMCO7	YMCO8	YMCO9	YMCO10														YFCO1	YFCO2	YFCO3	YFCO4	YFCO5	YFCO6	YFCO7	YFCO8	YFCO9	YFCO10
			predicted MTDR in seahorse well	23551.2	23978	21627.6	24088.6	23714.2	25344	21979.8	21435.2	13492.2	24613.8													predicted MTDR in seahorse well	26337.4	25634.4	27371	24185	24360.8	23569.2	24054.8	12225.4	17685.8	34230.6
[truncated: 74 more columns]

## Sheet: Young-Diaphragm
SMAPLE INFORMATION:	All data from Seahorse Machine:		Time (minutes)	NADH-YM1Di			Succ/Rot-YM1Di			NADH-YMDi2			Succ/Rot-YMDi2			NADH-YMDi3			Succ/Rot-YMDi3			NADH-YMDi4			Succ/Rot-YMDi4			NADH-YMDi5			Succ/Rot-YMDi5			NADH-YMDi6			Succ/Rot-YMDi6			NADH-YMDi7			Succ/Rot-YMDi7			NADH-YFDi1			Succ/Rot-YFDi1
Tissue: Diaphragm			1.30951	-11.7426	-7.45702	-19.2352	-19.5856	39.6066	-1.70805	12.8105	74.2733	-11.8564	-4.73692	-14.0961	-0.523841	-19.1863	3.96593	19.1902	-16.1446	-17.9599	22.1676	-9.74597	-10.9119	-12.1205	-5.69188	-17.6842	-1.12138	-16.4433	-13.2681	28.0248	-4.7324	-12.5571	-14.4753	-8.0197	20.219	26.3878	33.9772	-15.5712	7.24238	19.4238	-12.2228	-9.96897	-11.8382	-13.2838	-9.48112	-19.0233	-10.298	10.7658	20.5509
Tissue prep: Frozen			5.75478	-9.8572	23.0465	-9.3378	-10.6688	46.3547	6.02221	6.61353	11.5167	-9.84437	-3.12484	-7.96588	-2.40637	-13.5864	6.42786	13.8176	-9.58744	-8.81377	27.6916	-3.25979	17.1852	13.3824	2.07418	-1.80781	11.6429	0.416817	-1.19707	19.3086	19.8462	14.5204	-10.7266	-6.371	23.2697	22.8004	10.3937	-8.31885	14.9792	33.3397	-5.16745	23.3467	4.36669	-8.08539	-10.2944	-14.4489	-9.52381	9.31219	28.8961
Entire region			10.1948	-6.93154	64.7934	-7.80865	-9.22595	35.1205	8.83096	8.67051	2.7121	-0.346162	-0.60736	-4.32519	-0.565973	-6.86065	5.22097	10.213	-6.72627	2.47058	31.9106	-3.10631	23.9819	20.9246	1.522	8.38921	20.7499	5.17047	2.87729	30.4855	20.9795	17.7991	-8.99323	-4.71303	30.5732	19.6193	17.8777	-0.860093	38.6942	28.7117	2.19094	23.8636	11.2448	1.06389	13.7199	-8.94493	-6.26889	12.2294	38.0226
1 mL 1X MAS used			14.725	-17.9192	-24.0744	-16.5838	19.9069	17.5742	38.4819	63.0997	87.342	58.9354	13.7614	25.125	7.09425	89.1936	86.7951	100.356	26.2877	22.6722	126.742	-1.33906	-11.9063	9.7564	0.464582	136.956	13.6655	18.6872	130.53	-2.36684	23.4778	27.7225	16.2558	-15.3384	107.474	8.8875	151.967	-1.96367	42.5606	2.73199	-1.97328	8.72129	91.9018	33.233	9.8341	61.2312	58.3369	62.7628	43.84
1 ml homogenizer used			19.1682	-15.5858	-10.341	-13.789	13.4431	26.8264	24.35	49.0714	72.7186	43.4585	10.7948	18.5535	5.14906	65.4925	59.6488	64.5352	19.7013	19.8036	135.56	-3.73117	-4.84399	10.0566	-4.54409	138.119	20.1934	8.80397	91.5019	-5.0233	31.4436	22.0142	20.5393	-14.3263	75.0917	5.15191	152.622	-2.9026	57.9119	5.35293	-3.12218	15.3809	95.6654	31.2923	13.1895	41.3105	49.4432	50.7332	10.6371
Sex: male and female			23.6072	-11.7499	-4.30167	-10.9141	10.1618	29.7146	17.9616	41.8184	56.1932	32.7292	4.7344	7.80702	8.9836	50.9566	45.3284	50.7773	17.11	16.5074	136.05	-4.30596	-2.91416	8.75193	-2.26255	133.121	21.4445	0.716002	68.5805	-0.996708	31.448	15.7268	10.039	-13.6439	59.6801	5.79664	146.108	-3.59865	56.2923	1.85984	-1.79517	14.1597	82.3271	22.8932	10.1791	29.3886	42.0149	47.1631	11.1581
Strain: C57BL/6J			28.1345	-0.526453	-5.42545	-2.63237	-13.4836	0.484285	-9.20343	-5.74721	-24.4084	9.9275	6.66199	12.0865	-8.7531	-25.2623	-8.78032	-0.620912	-0.647973	-12.4026	-9.99605	-7.33943	-8.46508	-4.94015	-12.1524	-15.9089	8.62007	-16.5306	-14.335	10.9887	49.2396	-7.78444	-9.2139	-5.41257	-5.02716	-2.22082	4.57268	-9.773	20.7434	1.20889	-8.43432	0.361413	7.6272	-2.99738	-8.27665	10.8373	-9.18716	13.149	4.74669
Diet: Standard Chow			32.5764	-2.95052	-10.7326	15.1603	-14.9819	5.24807	-0.251272	0.245284	-15.6553	8.21885	2.21536	16.4696	-3.55756	-22.4552	0.120011	-2.97618	6.60192	-7.04967	-4.84586	-7.19221	-5.37211	4.45882	-8.749	-14.3249	11.4074	-6.55181	-8.282	11.0657	43.3032	2.28239	8.80536	-1.85902	-1.75152	3.79922	6.96957	-5.87264	27.6789	36.2829	-8.42253	3.67905	-0.808484	44.4216	-9.80719	-2.44597	-3.46877	14.0448	10.307
Age: 10 weeks			37.0162	-5.55961	-7.88376	-3.28485	-13.9896	8.28294	1.82945	2.87181	-10.692	7.18867	0.207885	16.9519	-0.967786	-20.6121	4.57673	-6.34127	1.76325	0.755345	-2.49906	-8.02991	-4.21504	6.5011	-5.99815	-11.27	8.48205	-1.40164	-3.99643	11.1203	34.0356	8.59626	-10.7317	-4.43199	-1.53547	3.0703	9.00119	-6.28812	28.598	22.3367	9.87666	1.54245	11.843	42.0086	-10.2099	-6.20571	-0.895487	17.11	11.0072
Protein used: 10 ug/well			41.5417	62.3103	7.97064	47.5968	60.0266	48.5918	63.5619	147.515	151.533	115.776	144.427	146.82	159.731	148.277	130.294	95.8007	131.528	128.356	144.33	83.8362	124.634	45.9027	121.725	93.3221	146.858	102.665	110.803	113.336	119.486	33.7174	97.807	149.772	178.271	141.677	144.931	134.079	149.851	96.2675	73.1792	79.6126	113.393	167.087	93.2845	60.3847	92.5631	101.051	76.1593
			45.9833	54.4061	4.36485	41.7771	56.4335	43.2173	68.3184	135.194	135.683	113.941	131.769	119.949	125.04	132.784	126.285	95.6823	115.263	95.117	122.634	82.2254	110.766	48.4399	110.226	71.8715	122.67	100.716	103.919	113.219	108.571	34.4274	92.9439	134.891	163.081	126.958	119.207	116.263	133.94	89.14	52.5809	71.7366	100.941	120.283	84.1172	64.583	83.5988	88.9291	79.2483
SHEET LEGEND:			50.4247	48.7737	4.37777	41.4275	56.4386	42.5179	58.4283	129.759	131.441	114.516	116.741	107.414	109.482	130.564	125.828	98.0102	106.778	83.9359	112.278	85.136	103.995	46.9713	103.679	65.6656	109.933	101.924	100.24	113.312	99.3472	28.7398	92.8359	124.358	155.764	124.644	103.07	103.84	130.321	85.3152	61.0455	67.2911	89.6806	100.654	78.5955	61.537	80.5031	89.248	76.9016
YM = Young Male			54.9453	4.57138	2.9166	-14.5576	2.16292	13.1238	-4.85765	15.048	15.96	22.5612	15.0674	6.92335	1.61147	11.2368	6.63216	14.0803	29.1276	20.7606	14.902	7.79279	-6.80258	-0.167141	5.78273	14.4369	28.9731	13.1966	5.79867	6.59245	47.5346	5.80796	4.72207	12.6162	24.3311	14.4883	25.2478	3.21113	39.0098	28.6129	-11.657	18.5674	2.50637	38.0304	9.74913	9.8958	12.2162	36.0091	18.3699
YF = Young Female			59.3894	-8.40805	1.73312	-10.3309	-3.49871	15.8242	-5.26117	13.1425	4.8396	16.1721	8.91775	1.90151	-0.619233	10.9372	5.35715	7.78434	15.4685	10.9962	9.88325	4.47403	-5.43686	-0.267314	1.52307	10.7673	21.8243	2.88844	7.56578	6.6185	38.1297	4.80388	9.45354	4.32077	22.0805	13.1498	18.3422	-0.118504	38.7344	33.2941	12.3979	8.64214	-0.75872	33.6782	7.30819	7.72069	2.08922	41.6652	13.3389
OM = Old Male			63.8401	-8.44457	0.855605	-11.0515	-4.00478	13.5204	-4.06953	13.3923	7.01636	15.4667	7.01926	0.745684	0.169071	11.7952	6.98619	7.97089	13.7495	9.46584	10.0891	2.76641	-4.01457	2.25617	2.36688	8.35591	22.6997	4.07458	9.0354	7.99541	40.2774	4.1836	6.34068	1.67447	19.6499	12.7194	20.0975	0.541213	35.3155	24.6307	7.35226	7.82123	-1.58791	34.3073	5.35318	7.10346	3.87236	28.335	14.3233
OF = Old Female
DI = Diaphragm	Biological Sample Average:		Time (minutes)	NADH-YM1Di	NADH-YMDi2	NADH-YMDi3	NADH-YMDi4	NADH-YMDi5	NADH-YMDi6	NADH-YMDi7	NADH-YMDi8	NADH-YMDi9			Succ/Rot-YM1Di	Succ/Rot-YMDi2	Succ/Rot-YMDi3	Succ/Rot-YMDi4	Succ/Rot-YMDi5	Succ/Rot-YMDi6	Succ/Rot-YMDi7	Succ/Rot-YMDi8	Succ/Rot-YMDi9				NADH-YFDi1	NADH-YFDi2	NADH-YFDi3	NADH-YFDi4	NADH-YFDi5	NADH-YFDi6	NADH-YFDi7	NADH-YFDI8	NADH-YFDI9	NADH-YFDI10		Succ/Rot-YFDi1	Succ/Rot-YFDi2	Succ/Rot-YFDi3	Succ/Rot-YFDi4	Succ/Rot-YFDi5	Succ/Rot-YFDi6	Succ/Rot-YFDi7	Succ/Rot-YFDI8	Succ/Rot-YFDI9	Succ/Rot-YFDI10
1, 2, 3…10 = sample number	(the average of three technical replicates per biological sample)		1.30951	-12.8116	25.0758	1.3233	-10.9261	-0.562185	12.8624	-0.922645	9.25652	19.525			6.10431	-6.4523	-3.97899	-8.16581	-10.5883	8.54946	-11.5344	16.8826	20.1679				-6.18518	-5.78113	-4.1209	6.92472	39.2521	23.9422	10.0972	22.8088	9.93588	6.56331		5.17924	33.9529	27.4849	23.7104	9.71937	6.34702	0.195934	25.7436	24.2913	38.0666
MTDR = mitoTracker Deep Red			5.75478	1.28384	2.76194	2.21968	9.10262	6.17613	13.233	17.173	8.93176	16.0468			13.9027	-4.49903	3.09679	3.96976	7.88	5.68468	-4.67102	5.51911	27.492				-4.88683	-2.00066	4.64496	15.417	17.5531	16.1481	15.2153	25.2163	12.0761	6.39432		17.7176	22.1057	36.433	37.7899	34.6155	15.358	13.5646	42.7401	24.2117	33.0106
			10.1948	16.6844	3.67881	2.85777	13.9334	12.8444	15.1598	18.2554	18.1708	26.5535			11.5752	-1.83284	9.21831	10.2204	9.92844	18.5706	8.67619	22.9566	25.576				-0.994825	2.93302	10.5027	21.968	24.5641	23.4064	25.6324	33.4515	10.5738	8.48169		27.3408	29.5442	41.4865	44.1101	17.2376	22.188	30.1705	28.9199	22.4424	29.9933
			14.725	-19.5258	69.7923	92.1149	-1.16298	48.9501	33.6743	3.16	19.2187	36.1079			25.321	15.3269	58.5673	50.3619	22.4854	64.1878	44.9896	74.8197	45.3668				60.777	6.55168	11.2079	-2.19527	86.0971	45.7354	30.6454	28.9583	16.4412	14.3166		24.6373	29.2908	51.7288	99.5133	125.175	20.1011	53.0197	41.7122	45.6106	36.9213
			19.1682	-13.2386	55.0828	63.2255	0.493818	31.7609	21.9725	5.87057	18.8448	18.2899			21.5399	11.4991	58.355	51.256	24.6657	69.2103	46.7157	66.161	49.984				47.1623	2.50262	12.8169	-3.44308	70.3764	31.1795	22.1501	27.0931	34.3824	15.0761		15.8784	25.7249	55.292	86.9804	126.776	15.3686	47.2544	36.566	50.7232	34.2411
			23.6072	-8.98856	43.5803	49.0208	0.510607	22.7666	17.2776	4.74146	17.5548	29.6355			19.2793	7.17501	56.556	50.7678	19.0713	66.2671	38.4665	58.7575	40.3729				39.5222	2.89036	6.72603	-1.21932	59.6352	23.5613	21.0914	26.0331	28.3781	13.166		21.0367	22.8672	52.8644	71.8943	123.516	18.2284	38.5384	29.4021	44.9442	35.2282
			28.1345	-2.86143	-6.74269	-11.5545	-6.91489	-6.62564	-4.22018	-2.28801	13.4283	19.8909			-7.40093	3.3318	-7.68222	-6.4804	10.7471	5.18104	-1.21561	20.3769	24.7395				4.93304	-8.36998	-9.36751	2.0476	10.1253	6.47798	11.8154	20.2321	2.29071	6.76648		13.173	10.2285	16.627	20.236	-2.6975	12.7494	3.70039	28.2232	18.0138	22.6685
			32.5764	0.492401	-2.39705	-8.43712	-2.70184	-1.25603	0.0628933	10.5131	15.971	15.5125			-3.32836	5.04247	-1.76454	-3.88885	18.1303	9.59195	11.2686	18.2292	27.3159				2.71002	-4.89177	-3.76974	5.2143	13.3784	7.7741	11.9056	16.6361	6.76594	3.13852		20.2974	11.1979	17.8244	15.4426	-1.98229	15.9661	11.7064	24.7961	15.916	24.3016
			37.0162	-5.57608	-0.21049	-7.45887	-1.91462	1.90741	-0.965719	11.2519	11.677	14.5903			-1.29242	5.39734	0.00651133	-2.92869	10.6334	10.437	14.5472	19.1314	28.1226				3.33625	-1.70757	-1.28508	4.32839	13.1741	13.0203	10.594	18.8849	3.80148	3.22184		17.488	10.657	16.16	16.246	0.63623	9.68834	8.36773	23.9825	13.7867	38.4121
			41.5417	39.2926	138.274	124.791	84.791	108.935	156.573	83.0198	65.6324	32.9755			57.3934	150.326	134.738	120.635	83.6702	142.954	124.588	55.5807	33.068				84.6663	92.9835	63.4137	90.8676	190.989	82.4682	83.0305	35.8409	32.2816	27.5947		91.2408	102.889	75.6193	87.9395	177.134	90.2615	104.762	44.4428	36.9383	28.2799
			45.9833	33.516	128.273	118.25	80.4772	105.951	141.643	71.1525	60.8016	33.4432			55.9898	125.586	111.004	101.589	78.6474	123.137	101.78	56.4047	34.1007				79.0369	85.4494	57.2878	81.9156	173.811	75.5296	81.3765	33.1954	30.1531	27.8972		87.5435	92.3351	71.3684	80.3927	147.842	79.4837	96.3476	42.7827	36.381	30.8941
			50.4247	31.5263	125.239	118.134	78.7008	105.159	134.922	71.2173	52.1676	30.7101			52.4616	111.212	100.997	93.0927	73.641	112.41	89.6432	51.6584	31.7699				77.0961	84.1229	55.373	78.2966	168.239	71.9918	79.7511	30.6163	26.2174	27.5733		84.3417	85.0829	71.1926	80.35	140.066	72.0791	93.8812	40.1967	24.3467	26.4269
			54.9453	-2.35653	17.8564	10.6497	0.274359	8.52923	17.1452	11.8411	48.2747	31.5468			3.47637	7.8674	21.5967	16.3976	19.3549	22.4896	16.762	50.7576	30.0541				19.3737	10.7117	4.75354	1.06267	22.1271	9.0795	24.1242	30.8491	26.634	30.2739		19.4165	16.4596	20.9863	26.773	29.3493	21.2527	22.4039	31.6774	24.111	29.2271
			59.3894	-5.66861	11.3847	8.02622	-0.410049	5.69091	13.1837	18.1114	44.4121	32.533			2.35478	3.40001	12.116	11.3716	17.4624	18.986	13.4092	50.9322	28.8269				17.1584	5.24269	4.17737	3.66094	21.6615	9.07441	20.1677	46.7394	25.1148	24.7374		16.43	13.8934	21.6035	26.5897	26.9356	17.0705	19.8107	30.196	23.977	26.4929
			63.8401	-6.21347	11.9584	8.91743	0.336003	7.03513	11.3479	13.2681	41.448	30.1593			1.81536	2.64467	11.1015	11.1408	16.9339	18.6514	12.6909	50.6234	27.1726				13.1036	2.62378	4.4159	4.83822	23.3093	12.2145	18.8604	33.5775	24.6825	20.1269		18.5599	14.6312	21.3894	24.1579	30.2387	19.0179	18.4123	35.5092	24.1476	28.122
	Complex Linked Resp. Averages:			YMDI1	YMDI2	YMDI3	YMDI4	YMDI5	YMDI6	YMDI7	YMDI8	YMDI9															YFDI1	YFDI2	YFDI3	YFDI4	YFDI5	YFDI6	YFDI7	YFDI8	YFDI9	YFDI10
	(average of three consectutive time points)		CI	-13.9177	56.1518	68.1204	-0.0528523	34.4925	24.3081	4.59067	18.5394	28.0111														CI	49.1538	3.98156	10.2503	-2.28589	72.0362	33.4921	24.629	27.3615	26.4006	14.1862
			CII	22.0467	11.3337	57.8261	50.7952	22.0741	66.5551	43.3906	66.5794	45.2412														CII	20.5175	25.961	53.2951	86.1293	125.156	17.8994	46.2708	35.8934	47.0927	35.4635
			CIV	45.03	129.818	117.986	93.2143	92.6672	135.273	90.2336	57.0409	32.6779														CIV	83.9875	90.4771	65.7091	83.2937	166.347	78.6356	89.8581	37.8458	31.053	28.111
	Biological Sample Avg/ug pro:		Time (minutes)	NADH-YM1Di	NADH-YMDi2	NADH-YMDi3	NADH-YMDi4	NADH-YMDi5	NADH-YMDi6	NADH-YMDi7	NADH-YMDi8	NADH-YMDi9			Succ/Rot-YM1Di	Succ/Rot-YMDi2	Succ/Rot-YMDi3	Succ/Rot-YMDi4	Succ/Rot-YMDi5	Succ/Rot-YMDi6	Succ/Rot-YMDi7	Succ/Rot-YMDi8	Succ/Rot-YMDi9				NADH-YFDi1	NADH-YFDi2	NADH-YFDi3	NADH-YFDi4	NADH-YFDi5	NADH-YFDi6	NADH-YFDi7	NADH-YFDI8	NADH-YFDI9	NADH-YFDI10		Succ/Rot-YFDi1	Succ/Rot-YFDi2	Succ/Rot-YFDi3	Succ/Rot-YFDi4	Succ/Rot-YFDi5	Succ/Rot-YFDi6	Succ/Rot-YFDi7	Succ/Rot-YFDI8	Succ/Rot-YFDI9	Succ/Rot-YFDI10
			1.30951	-1.28116	2.50758	0.13233	-1.09261	-0.0562185	1.28624	-0.0922645	0.925652	1.9525			0.610431	-0.64523	-0.397899	-0.816581	-1.05883	0.854946	-1.15344	1.68826	2.01679				-0.618518	-0.578113	-0.41209	0.692472	3.92521	2.39422	1.00972	2.28088	0.993588	0.656331		0.517924	3.39529	2.74849	2.37104	0.971937	0.634702	0.0195934	2.57436	2.42913	3.80666
			5.75478	0.128384	0.276194	0.221968	0.910262	0.617613	1.3233	1.7173	0.893176	1.60468			1.39027	-0.449903	0.309679	0.396976	0.788	0.568468	-0.467102	0.551911	2.7492				-0.488683	-0.200066	0.464496	1.5417	1.75531	1.61481	1.52153	2.52163	1.20761	0.639432		1.77176	2.21057	3.6433	3.77899	3.46155	1.5358	1.35646	4.27401	2.42117	3.30106
			10.1948	1.66844	0.367881	0.285776	1.39334	1.28444	1.51598	1.82554	1.81708	2.65535			1.15752	-0.183284	0.921831	1.02204	0.992844	1.85706	0.867619	2.29566	2.5576				-0.0994825	0.293302	1.05027	2.1968	2.45641	2.34064	2.56324	3.34515	1.05738	0.848169		2.73408	2.95442	4.14865	4.41101	1.72376	2.2188	3.01705	2.89199	2.24424	2.99933
			14.725	-1.95258	6.97923	9.21149	-0.116298	4.89501	3.36743	0.316	1.92187	3.61079			2.5321	1.53269	5.85673	5.03619	2.24854	6.41878	4.49896	7.48197	4.53668				6.0777	0.655168	1.12079	-0.219527	8.60971	4.57354	3.06454	2.89583	1.64412	1.43166		2.46373	2.92908	5.17288	9.95133	12.5175	2.01011	5.30197	4.17122	4.56106	3.69213
			19.1682	-1.32386	5.50828	6.32255	0.0493818	3.17609	2.19725	0.587057	1.88448	1.82899			2.15399	1.14991	5.8355	5.1256	2.46657	6.92103	4.67157	6.6161	4.9984				4.71623	0.250262	1.28169	-0.344308	7.03764	3.11795	2.21501	2.70931	3.43824	1.50761		1.58784	2.57249	5.5292	8.69804	12.6776	1.53686	4.72544	3.6566	5.07232	3.42411
			23.6072	-0.898856	4.35803	4.90208	0.0510607	2.27666	1.72776	0.474146	1.75548	2.96355			1.92793	0.717501	5.6556	5.07678	1.90713	6.62671	3.84665	5.87575	4.03729				3.95222	0.289036	0.672603	-0.121932	5.96352	2.35613	2.10914	2.60331	2.83781	1.3166		2.10367	2.28672	5.28644	7.18943	12.3516	1.82284	3.85384	2.94021	4.49442	3.52282
			28.1345	-0.286143	-0.674269	-1.15545	-0.691489	-0.662564	-0.422018	-0.228801	1.34283	1.98909			-0.740093	0.33318	-0.768222	-0.64804	1.07471	0.518104	-0.121561	2.03769	2.47395				0.493304	-0.836998	-0.936751	0.20476	1.01253	0.647798	1.18154	2.02321	0.229071	0.676648		1.3173	1.02285	1.6627	2.0236	-0.26975	1.27494	0.370039	2.82232	1.80138	2.26685
			32.5764	0.0492401	-0.239705	-0.843712	-0.270184	-0.125603	0.00628933	1.05131	1.5971	1.55125			-0.332836	0.504247	-0.176454	-0.388885	1.81303	0.959195	1.12686	1.82292	2.73159				0.271002	-0.489177	-0.376974	0.52143	1.33784	0.77741	1.19056	1.66361	0.676594	0.313852		2.02974	1.11979	1.78244	1.54426	-0.198229	1.59661	1.17064	2.47961	1.5916	2.43016
			37.0162	-0.557608	-0.021049	-0.745887	-0.191462	0.190741	-0.0965719	1.12519	1.1677	1.45903			-0.129242	0.539734	0.000651133	-0.292869	1.06334	1.0437	1.45472	1.91314	2.81226				0.333625	-0.170757	-0.128508	0.432839	1.31741	1.30203	1.0594	1.88849	0.380148	0.322184		1.7488	1.0657	1.616	1.6246	0.063623	0.968834	0.836773	2.39825	1.37867	3.84121
			41.5417	3.92926	13.8274	12.4791	8.4791	10.8935	15.6573	8.30198	6.56324	3.29755			5.73934	15.0326	13.4738	12.0635	8.36702	14.2954	12.4588	5.55807	3.3068				8.46663	9.29835	6.34137	9.08676	19.0989	8.24682	8.30305	3.58409	3.22816	2.75947		9.12408	10.2889	7.56193	8.79395	17.7134	9.02615	10.4762	4.44428	3.69383	2.82799
			45.9833	3.3516	12.8273	11.825	8.04772	10.5951	14.1643	7.11525	6.08016	3.34432			5.59898	12.5586	11.1004	10.1589	7.86474	12.3137	10.178	5.64047	3.41007				7.90369	8.54494	5.72878	8.19156	17.3811	7.55296	8.13765	3.31954	3.01531	2.78972		8.75435	9.23351	7.13684	8.03927	14.7842	7.94837	9.63476	4.27827	3.6381	3.08941
			50.4247	3.15263	12.5239	11.8134	7.87008	10.5159	13.4922	7.12173	5.21676	3.07101			5.24616	11.1212	10.0997	9.30927	7.3641	11.241	8.96432	5.16584	3.17699				7.70961	8.41229	5.5373	7.82966	16.8239	7.19918	7.97511	3.06163	2.62174	2.75733		8.43417	8.50829	7.11926	8.035	14.0066	7.20791	9.38812	4.01967	2.43467	2.64269
			54.9453	-0.235653	1.78564	1.06497	0.0274359	0.852923	1.71452	1.18411	4.82747	3.15468			0.347637	0.78674	2.15967	1.63976	1.93549	2.24896	1.6762	5.07576	3.00541				1.93737	1.07117	0.475354	0.106267	2.21271	0.90795	2.41242	3.08491	2.6634	3.02739		1.94165	1.64596	2.09863	2.6773	2.93493	2.12527	2.24039	3.16774	2.4111	2.92271
			59.3894	-0.566861	1.13847	0.802622	-0.0410049	0.569091	1.31837	1.81114	4.44121	3.2533			0.235478	0.340001	1.2116	1.13716	1.74624	1.8986	1.34092	5.09322	2.88269				1.71584	0.524269	0.417737	0.366094	2.16615	0.907441	2.01677	4.67394	2.51148	2.47374		1.643	1.38934	2.16035	2.65897	2.69356	1.70705	1.98107	3.0196	2.3977	2.64929
			63.8401	-0.621347	1.19584	0.891743	0.0336003	0.703513	1.13479	1.32681	4.1448	3.01593			0.181536	0.264467	1.11015	1.11408	1.69339	1.86514	1.26909	5.06234	2.71726				1.31036	0.262378	0.44159	0.483822	2.33093	1.22145	1.88604	3.35775	2.46825	2.01269		1.85599	1.46312	2.13894	2.41579	3.02387	1.90179	1.84123	3.55092	2.41476	2.8122
	Complex Linked Resp. Avg/ug pro:			YMDI1	YMDI2	YMDI3	YMDI4	YMDI5	YMDI6	YMDI7	YMDI8	YMDI9															YFDI1	YFDI2	YFDI3	YFDI4	YFDI5	YFDI6	YFDI7	YFDI8	YFDI9	YFDI10
			CI	-1.39177	5.61518	6.81204	-0.00528523	3.44925	2.43081	0.459067	1.85394	2.80111														CI	4.91538	0.398156	1.02503	-0.228589	7.20362	3.34921	2.4629	2.73615	2.64006	1.41862
			CII	2.20467	1.13337	5.78261	5.07952	2.20741	6.65551	4.33906	6.65794	4.52412														CII	2.05175	2.5961	5.32951	8.61293	12.5156	1.78994	4.62708	3.58934	4.70927	3.54635
			CIV	4.503	12.9818	11.7986	9.32143	9.26672	13.5273	9.02336	5.70409	3.26779														CIV	8.39875	9.04771	6.57091	8.32937	16.6347	7.86356	8.98581	3.78458	3.1053	2.8111
	Biological Sample Avg/MTDR:		Time (minutes)	NADH-YM1Di	NADH-YMDi2	NADH-YMDi3	NADH-YMDi4	NADH-YMDi5	NADH-YMDi6	NADH-YMDi7	NADH-YMDi8	NADH-YMDi9			Succ/Rot-YM1Di	Succ/Rot-YMDi2	Succ/Rot-YMDi3	Succ/Rot-YMDi4	Succ/Rot-YMDi5	Succ/Rot-YMDi6	Succ/Rot-YMDi7	Succ/Rot-YMDi8	Succ/Rot-YMDi9				NADH-YFDi1	NADH-YFDi2	NADH-YFDi3	NADH-YFDi4	NADH-YFDi5	NADH-YFDi6	NADH-YFDi7	NADH-YFDI8	NADH-YFDI9	NADH-YFDI10		Succ/Rot-YFDi1	Succ/Rot-YFDi2	Succ/Rot-YFDi3	Succ/Rot-YFDi4	Succ/Rot-YFDi5	Succ/Rot-YFDi6	Succ/Rot-YFDi7	Succ/Rot-YFDI8	Succ/Rot-YFDI9	Succ/Rot-YFDI10
			1.30951	-0.000400518	0.00122265	7.18476e-05	-0.000679764	-3.18641e-05	0.000595562	-3.90869e-05	0.000477234	0.000813716			0.000190834	-0.000314602	-0.000216036	-0.000508033	-0.000600133	0.000395863	-0.000488641	0.000870408	0.000840513				-0.000373483	-0.000366228	-0.000222067	0.000415754	0.00157387	0.00172778	0.000474371	0.00105255	0.00057865	0.000695428		0.000312741	0.00215088	0.00148111	0.00142355	0.000389713	0.00045803	9.2051e-06	0.00118799	0.00141469	0.00403342
			5.75478	4.01356e-05	0.000134667	0.000120515	0.000566316	0.000350057	0.000612726	0.000727514	0.00046049	0.00066876			0.000434628	-0.000219364	0.000168138	0.000246977	0.000446631	0.000263216	-0.000197883	0.000284546	0.00114575				-0.000295084	-0.00012674	0.000250308	0.000925622	0.000703817	0.00116532	0.000714823	0.00116365	0.000703293	0.000677523		0.00106985	0.00140037	0.0019633	0.00226887	0.00138796	0.0011083	0.000637271	0.00197232	0.00141005	0.0034977
			10.1948	0.00052159	0.000179372	0.00015516	0.000866861	0.00072801	0.00070194	0.000773371	0.000936823	0.00110663			0.000361865	-8.9366e-05	0.0005005	0.000635856	0.000562735	0.00085987	0.000367558	0.00118356	0.0010659				-6.00711e-05	0.000185804	0.000565968	0.00131894	0.000984935	0.00168912	0.00120422	0.00154368	0.000615802	0.000898693		0.00165093	0.00187159	0.00223562	0.00264833	0.000691168	0.00160119	0.00141743	0.00133456	0.00130701	0.003178
			14.725	-0.000610418	0.00340294	0.0050013	-7.23544e-05	0.00277444	0.00155921	0.00013387	0.00099085	0.00150482			0.000791588	0.000747311	0.00317986	0.00313324	0.00127445	0.00297207	0.00190594	0.00385744	0.00189069				0.00366993	0.000415042	0.000603969	-0.000131802	0.0034522	0.00330048	0.00143974	0.00133633	0.000957507	0.00151694		0.00148769	0.00185554	0.00278756	0.00597469	0.0050191	0.00145059	0.00249089	0.00192488	0.00265629	0.00391207
			19.1682	-0.000413867	0.00268574	0.00343277	3.07227e-05	0.00180018	0.00101738	0.0002487	0.000971573	0.000762246			0.000673381	0.000560675	0.00316833	0.00318887	0.00139803	0.00320463	0.00197906	0.00341103	0.00208312				0.00284783	0.000158538	0.000690678	-0.00020672	0.00282185	0.00225006	0.00104063	0.00125026	0.00200237	0.00159741		0.000958794	0.00162964	0.00297958	0.00522223	0.00508327	0.00110907	0.00222004	0.0016874	0.00295404	0.00362808
			23.6072	-0.000281001	0.00212489	0.00266154	3.17672e-05	0.00129039	0.000800001	0.000200867	0.000905063	0.00123508			0.000602712	0.00034984	0.00307066	0.0031585	0.00108094	0.00306835	0.00162959	0.00302933	0.00168257				0.00238649	0.000183101	0.000362453	-7.32069e-05	0.00239117	0.00170029	0.000990884	0.00120134	0.0016527	0.00139502		0.00127027	0.00144861	0.00284876	0.00431647	0.00495257	0.00131544	0.00181056	0.00135681	0.00261748	0.00373267
			28.1345	-8.94542e-05	-0.000328761	-0.000627342	-0.000430207	-0.000375535	-0.000195406	-9.69289e-05	0.000692315	0.000828967			-0.000231369	0.000162452	-0.000417099	-0.000403175	0.000609134	0.000239896	-5.14979e-05	0.00105056	0.00103104				0.000297875	-0.000530229	-0.000504797	0.000122936	0.000405989	0.000467482	0.000555092	0.000933646	0.000133407	0.000716955		0.000795432	0.000647965	0.000895997	0.00121495	-0.000108161	0.000920055	0.000173846	0.00130241	0.00104909	0.00240189
			32.5764	1.53935e-05	-0.000116876	-0.000458086	-0.000168094	-7.11908e-05	2.91213e-06	0.000445377	0.000823407	0.000646495			-0.000104052	0.000245861	-9.58041e-05	-0.000241943	0.00102761	0.000444133	0.000477383	0.000939834	0.00113841				0.000163641	-0.000309888	-0.000203144	0.000313062	0.000536429	0.000561015	0.000559332	0.000767701	0.000394038	0.000332548		0.00122563	0.000709374	0.000960521	0.00092716	-7.94831e-05	0.00115219	0.000549973	0.00114426	0.000926925	0.00257492
			37.0162	-0.00017432	-1.02631e-05	-0.000404973	-0.000119117	0.00010811	-4.47154e-05	0.000476676	0.000602026	0.000608059			-4.04038e-05	0.000263164	3.53527e-07	-0.000182207	0.00060269	0.000483263	0.000616278	0.000986345	0.00117203				0.000201455	-0.000108173	-6.92505e-05	0.000259873	0.000528235	0.000939609	0.000497714	0.000871476	0.000221392	0.000341376		0.00105599	0.000675106	0.000870831	0.000975397	2.55106e-05	0.000699156	0.000393121	0.00110672	0.000802916	0.00407002
			41.5417	0.00122837	0.006742	0.00677539	0.00527524	0.00617431	0.00724977	0.00351704	0.00338377	0.00137428			0.00179424	0.00732962	0.00731548	0.00750526	0.00474235	0.00661915	0.00527804	0.00286555	0.00137813				0.00511245	0.0058904	0.00341724	0.00545561	0.00765801	0.00595129	0.00390082	0.00165394	0.00188003	0.00292385		0.00550945	0.0065179	0.00407497	0.00527981	0.00710248	0.00651369	0.00492176	0.00205089	0.00215123	0.00299645
			45.9833	0.00104778	0.00625434	0.0064203	0.00500685	0.00600522	0.00655847	0.0030143	0.00313472	0.00139377			0.00175036	0.00612335	0.00602689	0.00632033	0.00445766	0.00570157	0.00431182	0.00290803	0.00142117				0.00477253	0.00541313	0.00308713	0.00491814	0.00696924	0.00545056	0.00382311	0.00153186	0.00175607	0.0029559		0.00528619	0.00584933	0.0038459	0.00482671	0.00592795	0.00573592	0.00452646	0.00197428	0.00211877	0.00327344
			50.4247	0.00098558	0.00610641	0.00641399	0.00489634	0.00596029	0.00624726	0.00301704	0.00268958	0.00127986			0.00164006	0.00542251	0.00548356	0.00579172	0.0041739	0.0052049	0.00379764	0.00266333	0.00132403				0.00465534	0.00532909	0.00298394	0.00470086	0.00674581	0.00519526	0.00374675	0.00141284	0.00152686	0.00292158		0.00509285	0.00538991	0.00383643	0.00482415	0.00561617	0.00520156	0.00441059	0.00185495	0.00141791	0.00280011
			54.9453	-7.36702e-05	0.000870645	0.000578218	1.70692e-05	0.000483429	0.000793869	0.000501635	0.00248887	0.00131474			0.000108679	0.0003836	0.00117258	0.00102017	0.00109702	0.00104133	0.000710102	0.00261689	0.00125253				0.00116985	0.000678572	0.000256159	6.38016e-05	0.00088722	0.000655219	0.00113337	0.00142358	0.00155112	0.00320773		0.00117244	0.0010427	0.00113091	0.00160743	0.00117681	0.00153369	0.00105255	0.00146181	0.00140418	0.00309682
			59.3894	-0.000177213	0.000555099	0.000435777	-2.5511e-05	0.000322555	0.000610442	0.000767268	0.00228973	0.00135584			7.36154e-05	0.000165778	0.000657826	0.000707477	0.000989751	0.000879105	0.000568068	0.00262589	0.00120138				0.00103608	0.000332119	0.00022511	0.0002198	0.00086855	0.000654851	0.000947489	0.00215687	0.00146264	0.0026211		0.000992103	0.000880133	0.00116417	0.00159642	0.00108002	0.00123189	0.000930716	0.00139345	0.00139638	0.0028071
			63.8401	-0.000194246	0.000583071	0.000484164	2.09043e-05	0.000398745	0.000525439	0.000562087	0.00213691	0.00125691			5.67521e-05	0.000128949	0.000602745	0.000693122	0.000959797	0.000863611	0.000537635	0.00260997	0.00113244				0.000791242	0.000166214	0.000237964	0.000290482	0.000934623	0.000881457	0.000886073	0.00154949	0.00143747	0.00213258		0.00112071	0.000926869	0.00115263	0.00145042	0.00121247	0.00137242	0.000865021	0.00163863	0.00140632	0.00297972
	Complex Linked Resp. Avg/MTDR:			YMDI1	YMDI2	YMDI3	YMDI4	YMDI5	YMDI6	YMDI7	YMDI8	YMDI9															YFDI1	YFDI2	YFDI3	YFDI4	YFDI5	YFDI6	YFDI7	YFDI8	YFDI9	YFDI10
			CI	-0.000435095	0.00273786	0.00369854	-3.28819e-06	0.001955	0.00112553	0.000194479	0.000955828	0.00116738														CI	0.00296808	0.000252227	0.000552367	-0.000137243	0.0028884	0.00241694	0.00115708	0.00126264	0.00153753	0.00150313
			CII	0.000689227	0.000552609	0.00313962	0.0031602	0.00125114	0.00308168	0.0018382	0.0034326	0.00188546														CII	0.00123892	0.0016446	0.00287197	0.00517113	0.00501832	0.0012917	0.00217383	0.00165636	0.0027426	0.00375761
			CIV	0.00140773	0.0063297	0.00640594	0.00579929	0.00525229	0.00626352	0.00382265	0.00294083	0.00136187														CIV	0.00507147	0.00573162	0.00354094	0.00500088	0.00666994	0.00567471	0.00422158	0.00174646	0.00180848	0.00297856
	MTDR (Mito. Content, RFU)/well:			YMDI1	YMDI2	YMDI3	YMDI4	YMDI5	YMDI6	YMDI7	YMDI8	YMDI9															YFDI1	YFDI2	YFDI3	YFDI4	YFDI5	YFDI6	YFDI7	YFDI8	YFDI9	YFDI10
			predicted MTDR in seahorse well	31987.6	20509.4	18418.2	16073.4	17643.2	21597	23605	19396.2	23994.8														predicted MTDR in seahorse well	16560.8	15785.6	18557	16655.8	24939.8	13857.2	21285.4	21670	17170.8	9437.8
[truncated: 68 more columns]

## Sheet: Young-Distal Colon
SMAPLE INFORMATION:	All data from Seahorse Machine:		Time (minutes)	NADH-YMDc1			Succ/Rot-YMDc1			NADH-YMDc2			Succ/Rot-YMDc2			NADH-YMDc3			Succ/Rot-YMDc3			NADH-YMDc4			Succ/Rot-YMDc4			NADH-YMDc5			Succ/Rot-YMDc5			NADH-YMDc6			Succ/Rot-YMDc6			NADH-YMDc7			Succ/Rot-YMDc7			NADH-YMDc8			Succ/Rot-YMDc8
Tissue: Distal Colon			1.30951	3.16967	-2.12559	6.02709	-3.28967	3.95736	19.4767	1.03577	-0.89668	1.12035	9.16338	4.82921	18.6823	30.9695	-3.67487	61.7662	110.383	32.6847	4.99768	8.20885	7.77921	8.68358	5.6849	1.40776	18.8958	9.64852	3.07043	2.81101	9.93498	17.5995	6.35581	5.27973	15.8175	10.3026	-12.75	12.1772	-5.79685	8.43696	4.09145	39.3325	21.4565	5.60575	8.89658	1.13705	25.613	7.37786	15.2654
Tissue prep: Frozen			5.75478	4.12921	16.2376	10.8823	-1.87963	5.02401	12.337	11.7412	3.58933	-0.644642	4.27933	19.0597	25.8295	24.5197	-6.29775	33.8575	45.3771	47.2636	-0.137313	10.7513	7.11016	17.9945	2.65381	8.81306	14.0568	14.035	2.67092	6.01124	10.9952	13.5278	5.8649	0.123439	25.6007	20.1929	-12.745	3.99281	-3.74815	7.6147	9.35733	41.5367	18.0724	4.2533	4.76122	1.31641	16.0037	1.93606	10.8705
Entire region			10.1948	2.17422	19.9026	11.3667	4.26207	5.25054	18.2197	0.930928	3.80039	-1.99535	2.40903	21.8204	24.9968	22.6082	-0.700808	36.1377	42.9004	43.1133	6.2363	10.9359	11.9266	28.2623	3.02262	8.37012	12.7059	23.2255	3.33886	14.1603	10.2149	15.9643	5.7462	0.918412	25.0921	21.0293	-10.7798	3.81627	10.495	10.0695	47.7545	7.26099	17.2882	4.59467	8.46019	2.22668	11.6095	-1.50079	9.18872
2 mL 1X MAS used			14.725	36.5396	15.8548	11.8633	-2.35402	-7.04261	5.13137	-4.38019	0.128831	-11.7346	-5.13204	11.2571	-5.44836	22.0765	-14.8444	8.08921	-13.8963	29.6619	25.9468	10.5883	2.45297	15.9037	27.4514	13.2537	28.3844	22.0099	17.0637	14.2568	28.7576	13.8578	21.0319	-9.39483	11.0389	25.202	-7.8357	20.6847	7.47715	4.07659	18.1652	5.58115	-2.84802	-5.42945	4.62313	-5.99237	9.77775	-7.11941	41.8149
7 ml homogenizer used			19.1682	25.7748	16.9572	14.2715	0.586818	-8.69472	2.43683	3.1511	-0.161596	-12.9802	-4.87286	10.9311	-10.7115	17.3799	-17.902	5.48876	1.53052	25.1013	16.5271	8.19826	-7.83372	24.8105	9.29585	10.3932	19.681	24.7547	13.9733	12.1095	18.9737	10.1271	17.1566	-11.0736	11.5312	25.5197	-4.68107	15.0353	8.49333	3.65208	14.35	2.66604	9.90222	-1.82229	1.40419	-0.266179	1.7197	-5.04059	28.8886
Sex: male and female			23.6072	22.1151	17.5043	11.8964	0.596433	-8.29735	-0.198543	3.52911	-2.24345	-12.3163	-5.22695	7.60396	-7.90229	15.9314	-17.4153	4.52608	4.6509	21.6651	11.405	7.19248	-9.32263	25.043	7.45155	11.1351	14.3324	18.2142	15.5421	11.0672	15.283	7.70364	11.9393	-10.615	10.8863	22.8732	-7.7017	12.8362	7.46995	3.86244	13.3253	5.10265	10.3136	-5.59016	-1.05677	1.33061	-0.309014	-0.36094	21.6714
Strain: C57BL/6J			28.1345	8.20509	8.48903	9.51998	-9.58903	3.4616	19.1297	-9.20864	-15.5359	-7.35762	-6.13522	-1.79459	-3.77472	19.5744	-18.3768	16.1996	1.85777	18.325	7.62947	-0.039272	9.941	11.1257	2.91981	-0.51241	7.99397	17.8431	-8.07769	-3.54475	13.1271	4.35914	7.93587	-5.69645	9.91458	2.98889	-9.31644	3.67424	1.07237	1.56571	8.9086	2.0573	7.77237	8.59316	-3.40532	14.3545	11.4458	-5.1787	2.90411
Diet: Standard Chow			32.5764	8.44679	13.1301	10.7412	-7.02291	8.56659	17.8416	-3.94877	-11.1394	-2.33085	-9.97241	-0.012157	0.833374	10.3409	-19.4045	14.5039	5.42361	15.98	7.59258	0.030934	10.3432	10.5494	3.86725	3.30849	7.68679	14.1948	-3.80345	-7.52965	12.5689	3.75195	6.69067	-4.09586	9.58221	6.23323	-5.59683	-1.56642	-0.304371	2.61254	10.0207	1.41038	20.4303	6.66741	0.229793	15.5575	8.21343	-4.57134	2.78956
Age: 10 weeks			37.0162	11.0913	7.69059	11.7195	-5.28098	8.90612	15.1349	-1.47059	-9.60466	-4.1762	-10.1969	5.07251	0.466799	9.80662	-17.396	14.4507	2.02609	13.9665	5.79359	-0.714985	7.139	11.7822	4.82736	1.0942	8.72666	15.6256	-3.98636	-7.83986	12.3491	5.28565	5.28136	-4.84404	7.607	6.08381	-2.12361	-4.73803	-3.71354	0.277095	8.27388	2.13853	14.1961	11.1547	3.65238	10.0612	6.68653	-3.39969	4.51163
Protein used: 10 ug/well			41.5417	4.11356	-3.24001	12.7892	12.0141	15.337	17.4542	10.3546	13.472	11.2516	9.67079	26.1085	8.49779	16.7856	-7.96595	20.6529	15.3876	21.6561	18.5084	18.9557	13.1884	10.3384	28.6929	15.6949	18.0428	39.5162	19.9082	19.3179	34.7725	27.4384	25.5014	13.2919	26.8892	22.7766	7.69374	16.7944	10.5371	6.87658	9.14137	10.2847	26.282	0.030108	14.0889	3.59876	13.7115	9.33526	20.9817
			45.9833	7.66404	2.75537	21.8174	11.0897	16.068	19.2116	10.7933	13.2038	17.9221	9.14027	23.9269	8.72705	16.1409	-6.8531	22.5775	13.4723	11.1921	15.8433	19.8765	16.3936	7.54772	23.2381	17.5437	16.9297	37.6048	20.1254	19.5517	35.9289	29.8499	29.3947	13.0258	23.7555	21.3078	9.21366	14.5698	9.98852	6.52855	11.6759	9.97695	21.3168	3.11354	12.2317	9.25236	15.9788	10.5218	20.8184
SHEET LEGEND:			50.4247	9.62748	4.27446	15.2649	10.2514	17.5485	17.5619	8.95773	12.2106	13.0692	7.79347	19.0744	7.45351	15.0961	-8.99337	17.5263	11.0945	13.2224	11.7792	19.0897	17.4553	15.3392	22.028	15.0661	15.7146	38.0213	19.9335	17.895	32.8564	30.0378	22.6672	11.6948	22.5355	21.0087	6.89987	13.1843	8.08931	5.25575	10.5809	8.32085	17.9471	3.34781	12.5852	6.76251	15.232	8.97026	20.2928
YM = Young Male			54.9453	0.943577	0.195603	-7.69314	-2.39824	8.35696	6.97194	2.45288	1.3849	-13.6331	-7.19294	-6.5932	-2.8745	15.2659	-9.52623	7.55103	-1.36778	5.8648	-6.81174	9.38949	-2.60076	0.210053	11.0656	-2.55468	1.00758	19.6786	-0.459868	-2.06591	15.5182	8.74076	-7.15264	-1.27859	9.05703	11.6417	-10.2296	-3.46869	-2.34629	0.92751	1.86819	1.57657	7.48642	-4.90788	-0.282234	2.99539	5.60006	-4.17212	8.83145
YF = Young Female			59.3894	-0.689676	0.442088	-5.5878	-3.07084	6.96801	5.55329	1.82674	1.42987	-11.3793	-8.05332	-2.51266	-4.59417	10.8917	-7.58445	10.1084	0.257518	6.5911	-5.39286	9.60744	-3.87782	-3.00771	-1.94735	-6.82763	-3.05242	18.2639	-4.46671	-5.70087	13.4033	5.54697	-8.06716	-1.38918	6.93462	10.5296	-11.5016	-5.23379	-4.97295	-1.74412	0.794889	-3.84522	6.4509	-5.93935	-0.485102	-0.943776	1.73157	-5.35733	5.56822
OM = Old Male			63.8401	-1.78565	0.787706	-5.1571	-3.9504	4.87427	7.88374	1.77713	1.21887	-8.04582	-9.48495	-1.06687	-5.08236	6.53458	-5.87361	7.58536	4.73325	6.5151	-0.20646	8.08732	-4.07902	4.04892	-2.47386	-7.2101	-3.79054	18.9668	-5.7356	-5.40171	13.9634	3.28216	-7.20033	-2.26348	6.66922	9.54576	-12.5752	-5.11312	-6.32908	-1.48348	0.226966	-2.67639	6.43749	-4.58679	-0.891945	-0.578671	0.656901	-6.40138	2.91606
OF = Old Female
DC = Distal Colon	Biological Sample Average:		Time (minutes)	NADH-YMDc1	NADH-YMDc2	NADH-YMDc3	NADH-YMDc4	NADH-YMDc5	NADH-YMDc6	NADH-YMDc7	NADH-YMDc8	NADH-YMDc9	NADH-YMDc10		Succ/Rot-YMDc1	Succ/Rot-YMDc2	Succ/Rot-YMDc3	Succ/Rot-YMDc4	Succ/Rot-YMDc5	Succ/Rot-YMDc6	Succ/Rot-YMDc7	Succ/Rot-YMDc8	Succ/Rot-YMDc9	Succ/Rot-YMDc10			NADH-YFDc1	NADH-YFDc2	NADH-YFDc3	NADH-YFDc4	NADH-YFDc5	NADH-YFDc6	NADH-YFDc7	NADH-YFDc8	NADH-YFDc9	NADH-YFDc10		Succ/Rot-YFDc1	Succ/Rot-YFDc2	Succ/Rot-YFDc3	Succ/Rot-YFDc4	Succ/Rot-YFDc5	Succ/Rot-YFDc6	Succ/Rot-YFDc7	Succ/Rot-YFDc8	Succ/Rot-YFDc9	Succ/Rot-YFDc10
1, 2, 3…10 = sample number	(the average of three technical replicates per biological sample)		1.30951	2.35706	0.419815	29.687	8.22388	5.17665	10.4666	17.287	11.376	14.9125	2.34435		6.71479	10.8916	49.355	8.66281	11.2968	-2.12323	11.9863	16.3305	3.13288	10.6235			8.47522	23.6663	18.0198	8.75919	17.4274	8.00358	15.1294	0.47498	13.5585	10.8674		31.3027	11.262	9.6854	10.4589	11.3981	12.9904	3.20625	9.35481	20.9124	27.3253
MTDR = mitoTracker Deep Red			5.75478	10.4164	4.89528	17.3598	11.952	7.5724	15.3057	19.5029	6.41872	13.8949	9.42083		5.16046	16.3895	30.8345	8.5079	10.1293	-4.16677	9.02898	22.7215	5.38081	14.3058			6.42762	19.5748	10.2254	7.44021	19.5054	6.58871	12.1438	6.0402	13.6627	11.5064		19.6631	16.5323	12.0663	10.5614	8.12335	14.9464	4.13987	18.9641	21.6127	24.6477
			10.1948	11.1478	0.911991	19.3484	17.0416	13.5749	15.6799	21.695	4.11179	14.3278	11.9112		9.2441	16.4087	30.75	8.03289	10.6418	1.17716	10.1143	18.7796	8.157	14.5228			4.66559	18.9676	29.9423	9.04793	20.693	7.12107	10.6138	9.64466	15.4752	12.7235		24.7403	11.3085	15.3802	11.655	8.8082	12.77	2.26669	19.1406	20.463	27.172
			14.725	21.4192	-5.32865	5.10712	9.64831	17.7768	8.94867	9.27431	-1.11134	26.0178	11.8998		-1.42175	0.225552	13.9042	23.0298	21.2157	6.7754	-1.21811	13.6549	38.4202	15.3656			9.36843	10.7231	18.7672	8.35322	3.53047	4.7542	22.4716	22.0283	6.51294	27.9395		33.9854	38.9047	19.7033	13.1659	3.13882	4.31013	24.2474	7.00372	41.2618	49.3227
			19.1682	19.0012	-3.33022	1.65556	8.39169	16.9458	8.65912	6.88937	-1.19569	23.2094	8.77299		-1.89036	-1.55107	14.3863	13.1234	15.4192	6.2825	3.16137	10.4602	32.5963	14.9354			15.4986	7.84564	21.8316	3.05984	2.23106	5.02486	16.8551	16.8322	3.96678	16.1049		17.0577	32.3661	12.5547	10.4211	1.99392	-3.64979	16.547	3.79657	38.2839	42.3017
			23.6072	17.1719	-3.6769	1.01406	7.63763	14.9411	7.71482	7.43013	0.220218	18.0319	5.9007		-2.63315	-1.84176	12.5737	10.973	11.642	4.20149	1.22223	6.89767	24.5663	14.333			10.0246	7.52634	18.0463	3.82578	4.32335	2.75319	12.5973	12.7537	2.12292	10.6904		17.5692	27.5566	10.518	12.4433	2.98021	-1.16591	12.3154	3.32572	35.2819	35.4808
			28.1345	8.73803	-10.7007	5.79906	7.00916	2.07356	2.40234	4.1772	6.87385	19.9288	5.91407		4.33409	-3.90151	9.27076	3.46712	8.47405	-1.52328	4.32007	4.4121	0.740712	17.2314			10.0787	8.63564	17.0832	6.07309	16.5655	0.994972	13.2874	18.6	12.7629	11.9865		18.8555	6.13678	1.35705	4.07266	6.28117	7.65579	10.3115	11.5902	19.5844	15.5155
			32.5764	10.7727	-5.80634	1.81343	6.9745	0.953902	3.90653	4.68121	6.39985	15.6754	5.19221		6.46175	-3.0504	9.6654	4.95417	7.6705	-2.48921	9.10917	2.0736	5.56914	17.884			5.4412	9.16821	15.1883	7.17505	11.8852	3.46538	11.9259	14.1684	11.5376	7.51649		17.8569	6.98799	1.38979	8.49205	8.88498	2.25013	9.30725	8.11692	19.2487	14.9063
			37.0162	10.1671	-5.08382	2.2871	6.06875	1.26647	2.94892	3.56317	4.44933	11.4896	4.77375		6.25334	-1.55252	7.26207	4.88274	7.6387	-3.52506	9.66772	2.8284	7.85228	16.0889			6.89573	9.18943	14.6147	7.28798	10.4716	8.93779	11.5524	14.5066	11.6897	4.75985		16.7902	7.8092	1.15235	8.70193	8.30027	6.93706	6.89963	5.45135	16.4582	16.0262
			41.5417	4.55424	11.6927	9.8242	14.1608	26.2475	20.9859	8.76755	8.88185	19.2852	8.91114		14.9351	14.759	18.5174	20.8102	29.2375	11.6751	13.467	18.3332	13.519	9.3222			12.1507	24.742	29.8876	30.0654	18.027	18.8347	24.8471	15.2233	17.8731	28.1128		21.0131	32.5803	17.9643	40.9874	19.6562	13.6579	22.1386	28.0991	26.9881	30.0728
			45.9833	10.7456	13.9731	10.6218	14.6059	25.7606	19.363	9.39381	11.9177	20.4455	8.9427		15.4564	13.9314	13.5026	19.2372	31.7245	11.2573	12.2207	17.845	14.2101	10.5095			12.3989	24.0979	29.157	30.4137	15.8577	12.8159	24.1544	16.4201	18.42	28.5329		19.7607	29.014	17.8889	38.9571	17.2815	10.5384	22.0178	25.845	24.1173	27.8135
			50.4247	9.72229	11.4125	7.87635	17.2947	25.2833	18.413	8.0525	10.3216	18.3199	9.67278		15.1206	11.4404	12.0321	17.6029	28.5205	9.39115	11.2934	18.9105	14.6397	9.30821			10.6414	22.403	25.7381	29.6307	14.5171	11.2353	14.7192	15.7003	18.0849	26.7656		16.1479	28.7981	18.0309	37.4745	17.2427	-1.43138	19.4367	25.0819	23.3152	26.3688
			54.9453	-2.18465	-3.26512	4.43024	2.33293	5.71762	6.47337	1.45742	1.47445	12.0858	-0.419961		4.31022	-5.55355	-0.771574	3.17283	5.7021	-5.34821	0.765434	5.86408	2.82691	8.15928			1.50249	9.12005	10.6641	4.02582	3.15741	2.513	6.81117	4.67576	2.61391	6.96939		9.7991	11.6653	2.97162	13.3842	10.5148	10.378	5.35396	9.04311	7.25509	13.1389
			59.3894	-1.94513	-2.70755	4.47187	0.907303	2.69878	5.35836	-1.59815	-1.52318	12.4579	-2.13149		3.15015	-5.05338	0.485253	-3.94247	3.62769	-7.23611	0.008815	2.00618	3.51452	1.54686			1.7798	3.92577	10.1122	1.01118	2.94838	-0.271392	7.75504	0.966332	1.21797	3.87608		9.34918	7.06198	3.8	10.7808	11.1504	-3.79993	6.4503	6.33442	5.66792	10.5846
			63.8401	-2.05168	-1.68327	2.74878	2.68574	2.60982	4.6505	-1.31097	-2.10772	9.79844	-1.68357		2.93587	-5.2114	3.68063	-4.4915	3.34841	-8.00579	0.319588	1.91603	6.60265	2.64638			3.77256	3.58466	10.9824	0.499605	2.50738	1.64233	7.8873	-0.391111	-0.31593	2.64735		9.67825	7.39753	2.0008	12.0407	11.1132	-0.280118	8.46818	2.68033	5.29358	6.31805
	Complex Linked Resp. Averages:			YMDC1	YMDC2	YMDC3	YMDC4	YMDC5	YMDC6	YMDC7	YMDC8	YMDC9	YMDC10														YFDC1	YFDC2	YFDC3	YFDC4	YFDC5	YFDC6	YFDC7	YFDC8	YFDC9	YFDC10
	(average of three consectutive time points)		CI	19.1974	-4.11192	2.59224	8.55921	16.5546	8.44087	7.8646	-0.695606	22.4197	8.85784													CI	11.6306	8.69837	19.5484	5.07961	3.36163	4.17742	17.308	17.2048	4.20088	18.2449
			CII	-1.98175	-1.05576	13.6214	15.7087	16.0923	5.75313	1.05516	10.3376	31.8609	14.878													CII	22.8708	32.9424	14.2587	12.0101	2.70432	-0.168526	17.7033	4.70867	38.2759	42.3684
			CIV	11.7557	12.8682	12.0624	17.2853	27.7956	15.1809	10.5325	14.3683	16.7366	9.44442													CIV	15.3521	26.9392	23.1111	34.5881	17.097	10.9418	21.219	21.0616	21.4664	27.9444
	Biological Sample Avg/ug pro:		Time (minutes)	NADH-YMDc1	NADH-YMDc2	NADH-YMDc3	NADH-YMDc4	NADH-YMDc5	NADH-YMDc6	NADH-YMDc7	NADH-YMDc8	NADH-YMDc9	NADH-YMDc10		Succ/Rot-YMDc1	Succ/Rot-YMDc2	Succ/Rot-YMDc3	Succ/Rot-YMDc4	Succ/Rot-YMDc5	Succ/Rot-YMDc6	Succ/Rot-YMDc7	Succ/Rot-YMDc8	Succ/Rot-YMDc9	Succ/Rot-YMDc10			NADH-YFDc1	NADH-YFDc2	NADH-YFDc3	NADH-YFDc4	NADH-YFDc5	NADH-YFDc6	NADH-YFDc7	NADH-YFDc8	NADH-YFDc9	NADH-YFDc10		Succ/Rot-YFDc1	Succ/Rot-YFDc2	Succ/Rot-YFDc3	Succ/Rot-YFDc4	Succ/Rot-YFDc5	Succ/Rot-YFDc6	Succ/Rot-YFDc7	Succ/Rot-YFDc8	Succ/Rot-YFDc9	Succ/Rot-YFDc10
			1.30951	0.235706	0.0419815	2.9687	0.822388	0.517665	1.04666	1.7287	1.1376	1.49125	0.234435		0.671479	1.08916	4.9355	0.866281	1.12968	-0.212323	1.19863	1.63305	0.313288	1.06235			0.847522	2.36663	1.80198	0.875919	1.74274	0.800358	1.51294	0.047498	1.35585	1.08674		3.13027	1.1262	0.96854	1.04589	1.13981	1.29904	0.320625	0.935481	2.09124	2.73253
			5.75478	1.04164	0.489528	1.73598	1.1952	0.75724	1.53057	1.95029	0.641872	1.38949	0.942083		0.516046	1.63895	3.08345	0.85079	1.01293	-0.416677	0.902898	2.27215	0.538081	1.43058			0.642762	1.95748	1.02254	0.744021	1.95054	0.658871	1.21438	0.60402	1.36627	1.15064		1.96631	1.65323	1.20663	1.05614	0.812335	1.49464	0.413987	1.89641	2.16127	2.46477
			10.1948	1.11478	0.0911991	1.93484	1.70416	1.35749	1.56799	2.1695	0.411179	1.43278	1.19112		0.92441	1.64087	3.075	0.803289	1.06418	0.117716	1.01143	1.87796	0.8157	1.45228			0.466559	1.89676	2.99423	0.904793	2.0693	0.712107	1.06138	0.964466	1.54752	1.27235		2.47403	1.13085	1.53802	1.1655	0.88082	1.277	0.226669	1.91406	2.0463	2.7172
			14.725	2.14192	-0.532865	0.510712	0.964831	1.77768	0.894867	0.927431	-0.111134	2.60178	1.18998		-0.142175	0.0225552	1.39042	2.30298	2.12157	0.67754	-0.121811	1.36549	3.84202	1.53656			0.936843	1.07231	1.87672	0.835322	0.353047	0.47542	2.24716	2.20283	0.651294	2.79395		3.39854	3.89047	1.97033	1.31659	0.313882	0.431013	2.42474	0.700372	4.12618	4.93227
			19.1682	1.90012	-0.333022	0.165556	0.839169	1.69458	0.865912	0.688937	-0.119569	2.32094	0.8773		-0.189036	-0.155107	1.43863	1.31234	1.54192	0.62825	0.316137	1.04602	3.25963	1.49354			1.54986	0.784564	2.18316	0.305984	0.223106	0.502486	1.68551	1.68322	0.396678	1.61049		1.70577	3.23661	1.25547	1.04211	0.199392	-0.364979	1.6547	0.379657	3.82839	4.23017
			23.6072	1.71719	-0.36769	0.101406	0.763763	1.49411	0.771482	0.743013	0.0220218	1.80319	0.59007		-0.263315	-0.184176	1.25737	1.0973	1.1642	0.420149	0.122223	0.689767	2.45663	1.4333			1.00246	0.752634	1.80463	0.382578	0.432335	0.275319	1.25973	1.27537	0.212292	1.06904		1.75692	2.75566	1.0518	1.24433	0.298021	-0.116591	1.23154	0.332572	3.52819	3.54808
			28.1345	0.873803	-1.07007	0.579906	0.700916	0.207356	0.240234	0.41772	0.687385	1.99288	0.591407		0.433409	-0.390151	0.927076	0.346712	0.847405	-0.152328	0.432007	0.44121	0.0740712	1.72314			1.00787	0.863564	1.70832	0.607309	1.65655	0.0994972	1.32874	1.86	1.27629	1.19865		1.88555	0.613678	0.135705	0.407266	0.628117	0.765579	1.03115	1.15902	1.95844	1.55155
			32.5764	1.07727	-0.580634	0.181343	0.69745	0.0953902	0.390653	0.468121	0.639985	1.56754	0.519221		0.646175	-0.30504	0.96654	0.495417	0.76705	-0.248921	0.910917	0.20736	0.556914	1.7884			0.54412	0.916821	1.51883	0.717505	1.18852	0.346538	1.19259	1.41684	1.15376	0.751649		1.78569	0.698799	0.138979	0.849205	0.888498	0.225013	0.930725	0.811692	1.92487	1.49063
			37.0162	1.01671	-0.508382	0.22871	0.606875	0.126647	0.294892	0.356317	0.444933	1.14896	0.477375		0.625334	-0.155252	0.726207	0.488274	0.76387	-0.352506	0.966772	0.28284	0.785228	1.60889			0.689573	0.918943	1.46147	0.728798	1.04716	0.893779	1.15524	1.45066	1.16897	0.475985		1.67902	0.78092	0.115235	0.870193	0.830027	0.693706	0.689963	0.545135	1.64582	1.60262
			41.5417	0.455424	1.16927	0.98242	1.41608	2.62474	2.09859	0.876755	0.888185	1.92852	0.891114		1.49351	1.4759	1.85174	2.08102	2.92375	1.16751	1.3467	1.83332	1.3519	0.93222			1.21507	2.4742	2.98876	3.00654	1.8027	1.88347	2.48471	1.52233	1.78731	2.81128		2.10131	3.25803	1.79643	4.09874	1.96562	1.36579	2.21386	2.80991	2.69881	3.00728
			45.9833	1.07456	1.39731	1.06218	1.46059	2.57606	1.9363	0.939381	1.19177	2.04455	0.89427		1.54564	1.39314	1.35026	1.92372	3.17245	1.12573	1.22207	1.7845	1.42101	1.05095			1.23989	2.40979	2.9157	3.04137	1.58577	1.28159	2.41544	1.64201	1.842	2.85329		1.97607	2.9014	1.78889	3.89571	1.72815	1.05384	2.20178	2.5845	2.41173	2.78135
			50.4247	0.972229	1.14125	0.787635	1.72947	2.52833	1.8413	0.80525	1.03216	1.83199	0.967278		1.51206	1.14404	1.20321	1.76029	2.85205	0.939115	1.12934	1.89105	1.46397	0.930821			1.06414	2.2403	2.57381	2.96307	1.45171	1.12353	1.47192	1.57003	1.80849	2.67656		1.61479	2.87981	1.80309	3.74745	1.72427	-0.143138	1.94367	2.50819	2.33152	2.63688
			54.9453	-0.218465	-0.326512	0.443024	0.233293	0.571762	0.647337	0.145742	0.147445	1.20858	-0.0419961		0.431022	-0.555355	-0.0771574	0.317283	0.57021	-0.534821	0.0765434	0.586408	0.282691	0.815928			0.150249	0.912005	1.06641	0.402582	0.315741	0.2513	0.681117	0.467576	0.261391	0.696939		0.97991	1.16653	0.297162	1.33842	1.05148	1.0378	0.535396	0.904311	0.725509	1.31389
			59.3894	-0.194513	-0.270755	0.447187	0.0907303	0.269878	0.535836	-0.159815	-0.152318	1.24579	-0.213149		0.315015	-0.505338	0.0485253	-0.394247	0.362769	-0.723611	0.0008815	0.200618	0.351452	0.154686			0.17798	0.392577	1.01122	0.101118	0.294838	-0.0271392	0.775504	0.0966332	0.121797	0.387608		0.934918	0.706198	0.38	1.07808	1.11504	-0.379993	0.64503	0.633442	0.566792	1.05846
			63.8401	-0.205168	-0.168327	0.274878	0.268574	0.260982	0.46505	-0.131097	-0.210772	0.979844	-0.168357		0.293587	-0.52114	0.368063	-0.44915	0.334841	-0.800579	0.0319588	0.191603	0.660265	0.264638			0.377256	0.358466	1.09824	0.0499605	0.250738	0.164233	0.78873	-0.0391111	-0.031593	0.264735		0.967825	0.739753	0.20008	1.20407	1.11132	-0.0280118	0.846818	0.268033	0.529358	0.631805
	Complex Linked Resp. Avg/ug pro:			YMDC1	YMDC2	YMDC3	YMDC4	YMDC5	YMDC6	YMDC7	YMDC8	YMDC9	YMDC10														YFDC1	YFDC2	YFDC3	YFDC4	YFDC5	YFDC6	YFDC7	YFDC8	YFDC9	YFDC10
			CI	1.91974	-0.411192	0.259224	0.855921	1.65546	0.844087	0.78646	-0.0695606	2.24197	0.885784													CI	1.16306	0.869837	1.95484	0.507961	0.336163	0.417742	1.7308	1.72048	0.420088	1.82449
			CII	-0.198175	-0.105576	1.36214	1.57087	1.60923	0.575313	0.105516	1.03376	3.18609	1.4878													CII	2.28708	3.29424	1.42587	1.20101	0.270432	-0.0168526	1.77033	0.470867	3.82759	4.23684
			CIV	1.17557	1.28682	1.20624	1.72853	2.77956	1.51809	1.05325	1.43683	1.67366	0.944442													CIV	1.53521	2.69392	2.31111	3.45881	1.7097	1.09418	2.1219	2.10616	2.14664	2.79444
	Biological Sample Avg/MTDR:		Time (minutes)	NADH-YMDc1	NADH-YMDc2	NADH-YMDc3	NADH-YMDc4	NADH-YMDc5	NADH-YMDc6	NADH-YMDc7	NADH-YMDc8	NADH-YMDc9	NADH-YMDc10		Succ/Rot-YMDc1	Succ/Rot-YMDc2	Succ/Rot-YMDc3	Succ/Rot-YMDc4	Succ/Rot-YMDc5	Succ/Rot-YMDc6	Succ/Rot-YMDc7	Succ/Rot-YMDc8	Succ/Rot-YMDc9	Succ/Rot-YMDc10			NADH-YFDc1	NADH-YFDc2	NADH-YFDc3	NADH-YFDc4	NADH-YFDc5	NADH-YFDc6	NADH-YFDc7	NADH-YFDc8	NADH-YFDc9	NADH-YFDc10		Succ/Rot-YFDc1	Succ/Rot-YFDc2	Succ/Rot-YFDc3	Succ/Rot-YFDc4	Succ/Rot-YFDc5	Succ/Rot-YFDc6	Succ/Rot-YFDc7	Succ/Rot-YFDc8	Succ/Rot-YFDc9	Succ/Rot-YFDc10
			1.30951	0.000143584	1.85651e-05	0.00137933	0.000379059	0.000223485	0.000300067	0.000824198	0.000559134	0.000552849	6.59984e-05		0.000409042	0.000481652	0.00229316	0.000399291	0.000487701	-6.08707e-05	0.000571474	0.000802651	0.000116145	0.000299075			0.000251672	0.00109536	0.000552039	0.000245246	0.000569955	0.000441044	0.000434679	1.32841e-05	0.00053255	0.000369698		0.000929534	0.000521249	0.000296713	0.000292836	0.000372769	0.000715847	9.2118e-05	0.000261633	0.0008214	0.000929582
			5.75478	0.00063453	0.00021648	0.000806582	0.000550897	0.000326914	0.000438799	0.000929849	0.000315483	0.000515125	0.000265216		0.000314358	0.00072478	0.00143265	0.00039215	0.000437299	-0.000119457	0.000430478	0.00111677	0.000199482	0.00040274			0.000190868	0.000905993	0.000313258	0.000208316	0.000637912	0.000363076	0.000348899	0.000168931	0.000536643	0.000391437		0.000583896	0.000765174	0.000369652	0.000295705	0.000265669	0.000823633	0.000118942	0.000530383	0.000848904	0.000838491
			10.1948	0.000679087	4.03302e-05	0.000898975	0.000785491	0.000586052	0.000449528	0.00103436	0.000202096	0.000531173	0.000335325		0.000563119	0.000725629	0.00142872	0.000370256	0.000459425	3.3748e-05	0.000482226	0.000923026	0.000302404	0.000408847			0.000138545	0.000877889	0.000917286	0.000253331	0.000676752	0.000392413	0.000304941	0.000269739	0.000607835	0.00043284		0.000734665	0.000523398	0.000471175	0.000326326	0.000288067	0.000703704	6.51236e-05	0.000535319	0.000803748	0.000924364
			14.725	0.00130479	-0.000235644	0.00023729	0.000444715	0.000767457	0.000256549	0.000442175	-5.46231e-05	0.000964555	0.000335005		-8.66083e-05	9.9744e-06	0.000646023	0.0010615	0.000915921	0.000194244	-5.80764e-05	0.000671143	0.00142435	0.000432573			0.000278195	0.000496306	0.000574936	0.000233879	0.000115462	0.000261984	0.000645626	0.000616081	0.000255816	0.000950474		0.0010092	0.00180065	0.000603611	0.000368629	0.000102653	0.000237513	0.000696647	0.000195878	0.00162068	0.00167791
			19.1682	0.00115748	-0.00014727	7.69215e-05	0.000386794	0.000731581	0.000248248	0.000328467	-5.87687e-05	0.000860437	0.000246978		-0.000115154	-6.85918e-05	0.000668424	0.000604889	0.000665672	0.000180113	0.000150726	0.000514123	0.00120844	0.000420464			0.000460231	0.000363125	0.000668812	8.56716e-05	7.29656e-05	0.000276899	0.00048426	0.000470759	0.000155807	0.000547875		0.000506528	0.00149802	0.000384615	0.000291777	6.52099e-05	-0.000201125	0.000475407	0.000106181	0.00150372	0.00143906
			23.6072	0.00104605	-0.0001626	4.71156e-05	0.000352037	0.000645035	0.000221176	0.000354249	1.08238e-05	0.000668494	0.000166117		-0.000160403	-8.14466e-05	0.000584204	0.000505774	0.000502604	0.000120453	5.82726e-05	0.000339024	0.000910744	0.000403504			0.000297682	0.000348347	0.000552849	0.000107117	0.000141393	0.000151717	0.000361929	0.000356693	8.33842e-05	0.000363677		0.000521719	0.00127542	0.000322221	0.000348397	9.74662e-05	-6.42487e-05	0.000353831	9.30127e-05	0.00138581	0.00120702
			28.1345	0.000532291	-0.000473208	0.000269439	0.00032307	8.95194e-05	6.88727e-05	0.000199158	0.000337853	0.000738818	0.000166494		0.000264018	-0.000172533	0.000430743	0.000159808	0.000365839	-4.36708e-05	0.00020597	0.000216857	2.74603e-05	0.0004851			0.000299288	0.000399689	0.000523346	0.000170039	0.000541766	5.48288e-05	0.000381756	0.0005202	0.000501303	0.00040777		0.000559915	0.000284033	4.15734e-05	0.000114029	0.000205422	0.000421879	0.000296256	0.000324152	0.000769237	0.000527822
			32.5764	0.000656234	-0.000256769	8.42564e-05	0.000321472	4.11816e-05	0.000111996	0.000223188	0.000314555	0.000581132	0.000146172		0.000393627	-0.000134895	0.000449079	0.00022835	0.000331149	-7.1363e-05	0.000434302	0.000101918	0.000206464	0.000503472			0.000161577	0.000424338	0.000465296	0.000200892	0.0003887	0.000190962	0.000342641	0.000396258	0.000453174	0.000255704		0.000530262	0.00032343	4.25762e-05	0.000237767	0.000290578	0.000123995	0.000267404	0.000227012	0.00075605	0.000507099
			37.0162	0.000619345	-0.000224817	0.000106264	0.000279724	5.46759e-05	8.45426e-05	0.000169883	0.000218687	0.000425952	0.000134391		0.000380932	-6.86556e-05	0.000337414	0.000225058	0.000329776	-0.00010106	0.000460932	0.000139017	0.000291107	0.000452937			0.000204769	0.00042532	0.000447721	0.000204054	0.000342467	0.000492524	0.00033191	0.000405717	0.000459149	0.000161925		0.000498584	0.000361439	3.53023e-05	0.000243643	0.000271456	0.000382272	0.000198232	0.000152462	0.000646447	0.000545195
			41.5417	0.000277428	0.000517078	0.000456457	0.000652708	0.00113315	0.000601645	0.000418014	0.000436547	0.000714958	0.000250868		0.000909794	0.000652676	0.000860364	0.000959193	0.00126223	0.000334713	0.000642072	0.000901084	0.000501188	0.00026244			0.000360815	0.00114515	0.000915611	0.000841793	0.000589562	0.0010379	0.000713877	0.00042576	0.00070202	0.000956372		0.000623985	0.00150794	0.000550339	0.00114759	0.000642844	0.000752629	0.000636059	0.000785867	0.00106004	0.00102305
			45.9833	0.000654584	0.000617919	0.000493516	0.000673224	0.00111213	0.000555118	0.000447872	0.000585758	0.000757975	0.000251756		0.000941552	0.000616077	0.000627363	0.000886691	0.0013696	0.000322736	0.000582651	0.000877089	0.000526808	0.000295864			0.000368186	0.00111534	0.000893227	0.000851544	0.000518617	0.000706228	0.000693974	0.000459234	0.000723501	0.000970663		0.000586795	0.00134287	0.000548027	0.00109075	0.000565182	0.000580729	0.000632588	0.000722826	0.000947282	0.000946188
			50.4247	0.000592248	0.000504686	0.000365955	0.000797158	0.00109152	0.000527882	0.000383922	0.000507311	0.00067917	0.000272309		0.000921096	0.000505921	0.00055904	0.000811361	0.00123128	0.000269235	0.000538438	0.00092946	0.000542737	0.000262046			0.000315995	0.00103689	0.00078849	0.000829622	0.000474774	0.00061913	0.000422894	0.000439101	0.000710341	0.000910541		0.000479512	0.00133288	0.000552379	0.00104924	0.000563914	-7.88775e-05	0.00055843	0.000701485	0.000915774	0.000897043
			54.9453	-0.000133082	-0.000144391	0.00020584	0.00010753	0.00024684	0.000185585	6.94861e-05	7.24696e-05	0.000448055	-1.18228e-05		0.000262564	-0.00024559	-3.58493e-05	0.000146244	0.00024617	-0.000153328	3.64939e-05	0.000288222	0.000104802	0.000229701			4.46163e-05	0.000422109	0.000326694	0.000112718	0.000103261	0.000138481	0.00019569	0.00013077	0.000102669	0.000237092		0.000290984	0.000539911	9.10358e-05	0.000374739	0.00034388	0.000571888	0.000153823	0.000252915	0.000284966	0.000446974
			59.3894	-0.000118491	-0.000119734	0.000207775	4.18199e-05	0.000116511	0.000153619	-7.61956e-05	-7.48649e-05	0.000461852	-6.0006e-05		0.000191896	-0.000223471	2.25461e-05	-0.000181718	0.000156614	-0.000207452	4.20276e-07	9.86044e-05	0.000130293	4.35475e-05			5.28512e-05	0.000181699	0.000309789	2.83117e-05	9.64252e-05	-1.49553e-05	0.000222808	2.70261e-05	4.78395e-05	0.000131861		0.000277624	0.000326854	0.000116413	0.00030185	0.000364668	-0.000209398	0.000185322	0.000177159	0.000222625	0.000360078
			63.8401	-0.000124981	-7.44379e-05	0.000127715	0.000123792	0.00011267	0.000133325	-6.25035e-05	-0.000103595	0.000363256	-4.7396e-05		0.000178843	-0.000230459	0.000171012	-0.000207025	0.000144557	-0.000229518	1.52371e-05	9.41738e-05	0.000244779	7.45013e-05			0.000112026	0.000165911	0.000336446	1.39883e-05	8.20025e-05	9.05019e-05	0.000226608	-1.09385e-05	-1.24091e-05	9.00604e-05		0.000287396	0.000342385	6.12947e-05	0.000337125	0.00036345	-1.54361e-05	0.000243297	7.49628e-05	0.000207921	0.000214934
	Complex Linked Resp. Avg/MTDR:			YMDC1	YMDC2	YMDC3	YMDC4	YMDC5	YMDC6	YMDC7	YMDC8	YMDC9	YMDC10														YFDC1	YFDC2	YFDC3	YFDC4	YFDC5	YFDC6	YFDC7	YFDC8	YFDC9	YFDC10
			CI	0.00116944	-0.000181838	0.000120442	0.000394515	0.000714691	0.000241991	0.000374964	-3.41893e-05	0.000831162	0.000249367													CI	0.00034537	0.000402593	0.000598866	0.000142223	0.00010994	0.0002302	0.000497271	0.000481178	0.000165002	0.000620675
			CII	-0.000120722	-4.6688e-05	0.000632884	0.000724055	0.000694732	0.000164936	5.03073e-05	0.000508096	0.00118118	0.000418847													CII	0.000679148	0.0015247	0.000436816	0.000336268	8.84432e-05	-9.28679e-06	0.000508628	0.000131691	0.0015034	0.00144133
			CIV	0.000716117	0.00056906	0.000560449	0.000796723	0.00119999	0.000435221	0.000502162	0.000706208	0.000620473	0.00026588													CIV	0.000455881	0.00124685	0.000708012	0.000968424	0.000559149	0.000602957	0.000609637	0.000589045	0.00084316	0.000950642
	MTDR (Mito. Content, RFU)/well:			YMDC1	YMDC2	YMDC3	YMDC4	YMDC5	YMDC6	YMDC7	YMDC8	YMDC9	YMDC10														YFDC1	YFDC2	YFDC3	YFDC4	YFDC5	YFDC6	YFDC7	YFDC8	YFDC9	YFDC10
			predicted MTDR in seahorse well	16415.9	22613.1	21522.7	21695.5	23163.3	34880.9	20974.3	20345.7	26973.9	35521.3													predicted MTDR in seahorse well	33675.7	21605.9	32642.3	35715.9	30576.9	18146.9	34805.9	35755.5	25459.5	29395.3
[truncated: 74 more columns]

## Sheet: Young-Duodenum
SMAPLE INFORMATION:	All data from Seahorse Machine:		Time (minutes)	NADH-YMDU1			Succ/Rot-YMDU1			NADH-YMDU2			Succ/Rot-YMDU2			NADH-YMDU3			Succ/Rot-YMDU3			NADH-YMDU4			Succ/Rot-YMDU4			NADH-YMDU5			Succ/Rot-YMDU5			NADH-YMDU6			Succ/Rot-YMDU6			NADH-YMDU7			Succ/Rot-YMDU7			NADH-YMDU8			Succ/Rot-YMDU8
Tissue: Duodenum			1.30951	-1.62161	-3.78752	-4.45207	2.12682	12.6094	13.049	-0.715855	-7.53129	-4.03085	-6.08589	-3.16743	-4.25659	3.84084	-1.40503	11.6267	-3.71259	-4.33735	19.4573	-2.38661	-2.51473	-3.7072	-0.339198	0.049872	2.37141	3.12054	-0.792555	-6.80433	-6.82487	11.5334	7.22169	-2.06739	-3.58241	-3.09788	-10.7419	-9.80405	-4.55246	6.40368	-5.71846	-13.3878	2.54376	-1.94875	-3.2946	-4.69443	8.42753	-0.279868	-8.88033
Tissue prep: Frozen			5.75478	0.307201	-1.10697	-3.24633	1.5414	11.2152	7.86609	0.645259	-9.05394	4.1127	-3.39652	-1.83337	-6.1378	12.9835	2.27833	16.9287	1.925	0.172497	18.0683	1.27394	1.91737	3.565	-2.04769	6.95888	0.051535	4.4531	0.242697	0.524105	-5.48207	19.0234	6.87358	-0.979762	-1.52202	-3.46272	-10.0887	-8.22295	-3.52162	9.12785	-2.62765	-12.0294	-1.40691	5.41666	-6.08448	-1.4249	2.9591	1.43492	-9.96924
Entire region			10.1948	-1.22015	-2.06684	-5.33416	2.61438	12.2099	5.4524	-0.981085	-5.68652	7.15249	-1.9168	-1.94488	-5.69999	16.6456	17.9352	15.9052	4.13635	-0.867796	30.2727	1.76968	7.93362	3.04052	-0.476269	8.24294	1.18768	4.57248	1.75949	6.50174	-6.47766	29.1267	4.01802	-1.09336	-0.449546	-4.48406	-10.1132	-8.20944	-2.70031	6.05771	-2.0177	-10.5914	-3.34813	40.5317	-5.22577	-1.37315	5.49057	4.27908	-7.81527
2 mL 1X MAS used			14.725	22.6885	22.3507	30.8782	2.80753	17.3576	23.5457	49.2487	36.2988	36.0059	12.3501	17.189	20.3285	10.5419	42.0164	40.5584	19.2554	10.3678	35.6073	18.8966	29.9809	22.5525	30.7139	39.4413	22.3726	26.0929	7.05302	29.1392	29.2951	5.42	10.3654	11.4956	0.806436	23.0399	-1.01636	16.4457	36.515	20.5077	26.9091	0.69669	29.4085	36.5039	18.6949	16.2923	36.446	4.69814	29.998
7 ml homogenizer used			19.1682	19.3479	21.0287	22.92	0.865881	15.9334	21.1685	28.3887	22.553	25.8487	13.7405	17.9104	20.8011	11.4648	31.778	32.1157	19.552	13.276	28.9587	14.3541	23.4916	17.8673	24.3579	25.0996	21.8605	27.3025	8.14338	26.3506	25.1187	11.4984	8.63339	19.5102	-3.5929	21.4536	0.664006	14.1864	26.7899	17.1305	18.7297	-2.02932	24.6883	30.7614	15.8059	13.9488	21.5298	0.976948	28.2047
Sex: male and female			23.6072	14.2148	16.6802	17.2054	0.404883	16.1734	17.5923	27.2611	9.97632	15.2733	9.59939	15.9942	19.025	11.8373	17.793	29.8315	23.2461	7.8579	28.3484	10.6711	18.3873	15.3934	22.1366	21.5276	14.0987	20.187	8.89876	20.1485	13.8949	9.97753	4.83276	6.73857	-5.56464	17.0063	1.15801	10.6196	19.1662	16.4156	12.4757	-5.49744	19.3159	23.9258	13.5998	12.9947	22.3167	0.812769	26.2681
Strain: C57BL/6J			28.1345	3.44478	10.4576	16.6215	6.08124	20.1861	14.8701	17.6522	-11.2429	8.04786	11.494	19.2769	11.839	9.61095	-8.90993	25.2719	5.89188	6.15645	26.4011	6.56989	15.7288	9.6888	-4.71997	-8.22956	11.4111	4.82559	7.58981	4.72207	-0.806468	-6.47614	-1.05781	14.7483	7.9639	5.22388	4.00733	-3.23149	-7.23279	5.22579	19.7149	1.11508	18.9394	23.2539	14.4312	-1.04489	-3.63653	0.04986	9.52375
Diet: Standard Chow			32.5764	4.92473	11.6893	12.3914	6.81626	8.00758	11.5729	19.5531	0.077353	5.24566	11.2415	18.3561	9.94823	10.509	-5.16364	20.9289	2.26609	4.15152	19.0701	9.26853	11.1221	8.54601	0.848556	0.380444	2.68849	18.177	14.4213	15.9836	6.76227	-1.37376	-0.212111	11.859	12.6739	9.958	3.95815	-0.938629	-1.68635	6.26292	14.6298	-0.84081	17.9143	20.0486	12.3016	2.37089	4.17442	-1.85765	5.83739
Age: 10 weeks			37.0162	6.52155	10.431	7.96988	5.4532	6.1844	8.62352	20.8616	4.53509	11.278	8.00886	16.1892	6.38586	9.99239	-4.27273	20.359	2.94558	2.74859	9.31592	9.33835	5.88471	6.92642	3.7532	3.78233	3.74741	7.16254	3.39552	5.32091	12.0643	0.428244	-1.64359	0.676501	11.6855	6.18392	3.52649	0.227835	1.09091	6.72709	11.5353	-5.31657	5.91992	17.7167	7.07637	-1.2468	4.72685	-5.72318	5.4993
Protein used: 8-10 ug/well			41.5417	23.6968	14.4005	19.2492	34.4332	15.0944	26.476	13.6412	6.27226	-9.37509	5.79541	1.88054	-3.09859	18.3638	12.9882	20.7848	14.5855	15.994	23.465	15.5592	4.41001	-0.66175	19.6807	9.31125	4.90988	17.0325	27.0311	-5.40072	17.0522	0.15443	-0.152763	32.6811	28.0533	18.9235	21.5328	27.1639	23.6045	28.5068	-6.93091	-0.59473	3.63533	18.883	1.37835	4.61061	15.598	8.00808	8.72544
			45.9833	22.8124	18.6034	22.0937	33.5031	20.8028	26.4714	13.2887	-7.90139	-5.8397	8.07137	4.49932	-5.81916	16.2164	7.2927	19.9782	11.6947	4.71839	17.4079	17.5079	5.78925	0.970787	18.0514	7.92628	3.84253	35.1372	-21.6019	-4.54776	13.9347	-1.65638	-2.13741	38.3084	27.8707	20.9985	23.3773	26.0818	23.5355	19.7333	-1.7049	0.038596	4.13687	18.0362	2.1149	7.84928	20.6937	7.86317	10.3299
SHEET LEGEND:			50.4247	21.9569	18.4269	23.7278	33.4974	22.6952	26.7281	14.7621	-12.1045	-3.95522	5.2631	0.284278	-3.5306	14.693	4.85566	19.7495	13.1497	3.84625	16.6664	13.9243	7.81047	0.716317	18.8137	7.58098	3.10317	8.75518	6.43713	-3.79208	13.654	-2.35512	-1.49042	36.6399	26.7084	20.6697	23.1768	24.7984	22.6498	15.4021	-0.18234	0.599658	7.14645	18.9497	2.19849	8.28896	21.3219	7.63177	10.8377
YM = Young Male			54.9453	-2.7152	2.6082	-0.114165	3.78742	5.16457	15.4605	-7.99278	-3.19091	-7.55718	4.53644	-6.09336	-3.31574	7.91149	-3.8249	17.8544	3.53018	0.136871	11.8426	11.6947	4.35345	1.53638	15.8261	-0.457585	-3.019	22.0138	3.9593	-1.1189	0.20569	-6.11961	-7.46854	2.42981	10.2384	1.26198	4.37284	-4.52062	-1.90175	-15.1673	16.9871	-1.68677	-1.12419	-20.2647	0.194206	-0.646135	9.99844	-1.32919	-2.52399
YF = Young Female			59.3894	-2.39068	2.04567	0.777724	4.08564	3.59489	4.09438	21.4656	-3.1278	-5.22786	15.1416	-2.9655	-2.75127	8.1385	0.046441	11.6379	4.72701	3.35247	12.3824	17.2865	2.68878	0.803845	10.4644	0.895613	-4.05592	6.38255	3.68064	-2.6787	1.47011	-4.98509	-6.52108	2.94924	8.35086	-0.754339	7.5093	-4.88868	-2.45415	-6.48387	10.1526	-9.58482	0.583413	-7.98078	0.121097	-1.7533	7.08559	-1.04703	-3.37914
OM = Old Male			63.8401	-2.42367	4.69629	1.60877	4.8045	3.53172	3.45226	20.7794	-1.71815	-3.16626	-1.63414	-4.77916	-2.43059	7.39721	1.46177	11.2993	6.10641	-0.171617	12.4804	9.74316	2.94076	2.45635	9.67966	1.97803	-3.48626	2.30396	3.9661	-3.23387	2.40505	-5.36485	-6.80685	3.41996	8.83919	-0.957332	7.27041	-2.89236	-1.88745	-3.77608	1.91349	-15.8352	0.798886	0.481132	-0.999012	-2.47613	-3.92518	-1.03479	-4.72381
OF = Old Female
DU = Duodenum	Biological Sample Average:		Time (minutes)	NADH-YMDU1	NADH-YMDU2	NADH-YMDU3	NADH-YMDU4	NADH-YMDU5	NADH-YMDU6	NADH-YMDU7	NADH-YMDU8	NADH-YMDu9	NADH-YMDu10		Succ/Rot-YMDU1	Succ/Rot-YMDU2	Succ/Rot-YMDU3	Succ/Rot-YMDU4	Succ/Rot-YMDU5	Succ/Rot-YMDU6	Succ/Rot-YMDU7	Succ/Rot-YMDU8	Succ/Rot-YMDu9	Succ/Rot-YMDu10			NADH-YFDU1	NADH-YFDU2	NADH-YFDU3	NADH-YFDU4	NADH-YFDU5	NADH-YFDU6	NADH-YFDU7	NADH-YFDu8	NADH-YFDu9	NADH-YFDu10		Succ/Rot-YFDU1	Succ/Rot-YFDU2	Succ/Rot-YFDU3	Succ/Rot-YFDU4	Succ/Rot-YFDU5	Succ/Rot-YFDU6	Succ/Rot-YFDU7	Succ/Rot-YFDu8	Succ/Rot-YFDu9	Succ/Rot-YFDu10
1, 2, 3…10 = sample number	(the average of three technical replicates per biological sample)		1.30951	-3.28707	-4.09266	4.6875	-2.86951	-1.49211	-2.91589	-4.23418	1.15108	5.49927	-6.44084		9.26174	-4.5033	3.80246	0.694027	3.97674	-8.36613	-0.899862	-4.36344	20.8038	18.7445			3.86994	-2.7306	-3.72105	-0.887958	-1.78313	-3.73251	-5.19035	-7.24477	-5.08825	0.34635		-0.925543	28.3782	-6.21747	10.1141	-2.598	1.24506	5.07353	5.21726	12.7351	0.544126
MTDR = mitoTracker Deep Red			5.75478	-1.3487	-1.43199	10.7302	2.2521	1.73997	-1.98817	-1.84306	0.989706	7.41547	-1.3348		6.87424	-3.78923	6.72193	1.65424	6.80498	-7.27774	-0.691578	-5.51717	9.95243	19.6342			3.49256	1.73348	-2.82244	-1.49741	-1.223	-2.11047	2.37712	-5.86466	-6.64382	3.76364		-1.79167	12.9654	-5.20997	8.89168	0.982843	3.20299	2.5261	2.52422	3.016	1.18051
			10.1948	-2.87371	0.161628	16.8287	4.24794	4.2779	-2.00899	-2.18381	2.79883	6.00194	-0.0767903		6.75888	-3.18722	11.1804	2.98478	8.88902	-7.00765	10.6526	-4.79993	7.21292	11.0895			3.82389	3.05399	0.699056	-1.5537	-0.466381	-0.840328	2.12985	-5.03525	-6.36199	3.28652		-0.141174	11.4316	-3.77934	7.83066	5.05424	3.34837	0.964921	-1.66939	4.1782	0.131295
			14.725	25.3058	40.5178	31.0389	23.81	20.7617	11.7807	16.0378	19.1455	8.20384	9.89916		14.5703	16.6225	21.7435	30.8426	15.0268	17.3148	28.2025	32.9909	10.7721	7.20015			16.6492	23.9737	16.6204	9.84478	25.4243	20.1101	17.136	2.64315	-5.8004	-0.861701		75.738	90.7693	19.4416	33.3064	29.9296	124.517	31.6377	13.1457	12.2376	-0.680322
			19.1682	21.0989	25.5968	25.1195	18.571	20.5988	12.457	11.277	12.1518	10.6461	9.04941		12.6559	17.484	20.5956	23.7727	15.0835	13.8801	23.7519	29.1534	11.8632	10.0942			13.7961	18.6468	11.7335	5.61905	16.8683	15.9087	13.7029	-4.37824	-2.51427	4.856		68.1756	70.7264	14.6143	28.6372	23.1846	97.613	24.873	12.8917	11.0672	6.13548
			23.6072	16.0334	17.5036	19.8206	14.8173	16.4114	6.06007	7.79795	12.0414	9.49425	8.10214		11.3902	14.8729	19.8175	19.2543	9.5684	10.3146	18.9472	24.194	10.5844	14.1397			12.6423	13.0465	9.23288	3.88932	9.75795	12.1114	9.55043	2.73299	-4.07581	3.50964		60.9138	56.8938	11.1759	25.329	17.475	77.5175	27.8122	9.80677	11.5274	5.69493
			28.1345	10.1746	4.81904	8.65763	10.6625	5.71249	9.31203	8.68527	-1.54385	1.32852	-5.5937		13.7125	14.2033	12.8165	-0.512798	-2.78014	-2.15231	18.8748	11.7538	11.9101	7.41857			7.73	5.02006	9.4177	7.49826	0.83039	6.88817	3.74218	-2.60402	-3.63069	10.178		5.21388	8.6378	6.3981	5.09394	13.7137	5.33648	3.99563	0.380159	-1.85828	-0.307132
			32.5764	9.66848	8.29203	8.75809	9.64555	16.194	11.4969	6.68398	1.56255	0.465096	-1.39039		8.79891	13.182	8.4959	1.30583	1.72547	0.444392	16.7548	9.7176	14.0174	7.36842			7.04055	4.78281	9.28947	4.72028	4.25492	6.94403	4.39245	-3.22169	-3.37421	7.48751		5.53772	9.51255	6.55317	6.23322	9.31749	5.3628	6.39733	4.1215	1.56098	3.31817
			37.0162	8.30749	12.2249	8.69288	7.38316	5.29299	6.18197	4.31527	-0.747713	1.7295	-0.691839		6.7537	10.1946	5.00336	3.76098	3.61633	1.61508	10.2376	7.73774	11.272	4.80072			6.83784	5.24118	7.3665	5.47472	5.86991	6.45179	4.01991	1.20771	-5.26611	2.53811		5.53621	10.066	10.0845	5.03723	8.22773	8.59315	7.57729	4.71532	2.50506	4.66453
			41.5417	19.1155	3.51279	17.3789	6.43583	12.8876	26.5526	6.99371	9.40558	28.2611	11.0272		25.3345	1.52579	18.0148	11.3006	5.68463	24.1004	7.96555	11.8454	26.3611	14.553			25.3991	40.9975	41.4167	41.5558	4.30585	70.0639	51.4301	23.4377	42.0852	22.7032		36.9574	48.8529	36.1075	43.9429	11.9915	76.8186	46.3141	43.6674	47.2568	16.6174
			45.9833	21.1698	-0.150785	14.4958	8.08932	2.99585	29.0592	6.02234	12.1354	29.9981	11.6081		26.9258	2.25051	11.2737	9.94008	3.38029	24.3315	8.096	14.3541	34.7786	14.4386			20.8246	42.539	37.8749	43.2743	3.7371	67.4318	52.1148	24.9187	46.1103	20.853		32.8117	47.2926	38.6893	41.3885	12.3702	70.9758	46.2494	44.2684	52.126	17.0194
			50.4247	21.3705	-0.43254	13.0994	7.48368	3.80008	28.006	5.27312	12.4142	33.8132	7.97093		27.6403	0.672258	11.2208	9.8326	3.2695	23.5417	9.43155	14.7451	41.6537	13.5847			18.7181	40.207	35.0884	38.2721	2.95724	59.0373	48.6743	20.2892	42.4358	17.8669		29.2737	44.4428	37.1557	39.3806	9.62987	64.123	47.8918	39.4944	51.9845	15.696
			54.9453	-0.0737233	-6.24696	7.31368	5.86152	8.28472	4.64339	0.0443527	2.67437	4.78281	-6.57728		8.13749	-1.62422	5.16987	4.11651	-4.46082	-0.683174	-7.06491	-0.79571	16.6794	3.66699			-0.469325	5.13473	-2.81733	-8.99112	9.2627	7.95779	6.66318	-6.84962	-2.00467	-0.230087		2.63696	8.39364	1.8452	2.80715	2.4863	7.79038	5.46798	-0.977794	5.15367	1.39449
			59.3894	0.144239	4.36999	6.60763	6.92637	2.4615	3.51526	-1.97204	1.42842	0.722908	-5.54878		3.92497	3.14161	6.82062	2.43469	-3.34535	0.0554897	-2.42542	0.692594	7.98093	1.77049			0.583032	5.26708	-1.49969	-5.42061	3.38075	5.00538	5.62426	-3.29692	-5.39516	0.365081		3.96193	9.43822	1.98731	2.70219	1.91706	8.313	6.22395	-3.92491	1.94952	0.243902
			63.8401	1.29379	5.29834	6.71942	5.04676	1.01206	3.76727	-5.89926	-2.4787	-0.240542	-6.53507		3.92949	-2.94796	6.13841	2.72381	-3.25555	0.830201	0.0936687	2.01	7.24856	2.20873			1.22976	4.84913	-0.293358	-0.964074	-1.63934	8.19627	6.88009	-2.28327	-5.53031	1.65946		3.52971	9.7536	2.12321	3.37287	-1.14432	7.18619	6.44847	-5.23402	1.68001	3.04624
	Complex Linked Resp. Averages:			YMDU1	YMDU2	YMDU3	YMDU4	YMDU5	YMDU6	YMDU7	YMDU8	YMDU9	YMDU10														YFDU1	YFDU2	YFDU3	YFDU4	YFDU5	YFDU6	YFDU7	YFDU8	YFDU9	YFDU10
	(average of three consectutive time points)		CI	20.8127	27.8727	25.3263	19.0661	19.2573	10.0992	11.7042	14.4462	9.44806	9.0169													CI	14.3625	18.5557	12.5289	6.45105	17.3502	16.0434	13.4631	0.332635	-4.13016	2.50132
			CII	12.8721	16.3265	20.7189	24.6232	13.2262	13.8365	23.6338	28.7794	11.0732	10.478													CII	68.2758	72.7965	15.0773	29.0909	23.5298	99.8826	28.1076	11.9481	11.6107	3.7167
			CIV	23.5927	1.22967	14.2472	8.84702	5.33633	25.9319	7.29705	12.4833	32.4776	12.1971													CIV_avg	27.3308	44.0553	37.7221	41.3024	7.49862	68.0751	48.7791	32.6793	46.9998	18.4593
	Biological Sample Avg/ug pro:		Time (minutes)	NADH-YMDU1	NADH-YMDU2	NADH-YMDU3	NADH-YMDU4	NADH-YMDU5	NADH-YMDU6	NADH-YMDU7	NADH-YMDU8	NADH-YMDu9	NADH-YMDu10		Succ/Rot-YMDU1	Succ/Rot-YMDU2	Succ/Rot-YMDU3	Succ/Rot-YMDU4	Succ/Rot-YMDU5	Succ/Rot-YMDU6	Succ/Rot-YMDU7	Succ/Rot-YMDU8	Succ/Rot-YMDu9	Succ/Rot-YMDu10			NADH-YFDU1	NADH-YFDU2	NADH-YFDU3	NADH-YFDU4	NADH-YFDU5	NADH-YFDU6	NADH-YFDU7	NADH-YFDu8	NADH-YFDu9	NADH-YFDu10		Succ/Rot-YFDU1	Succ/Rot-YFDU2	Succ/Rot-YFDU3	Succ/Rot-YFDU4	Succ/Rot-YFDU5	Succ/Rot-YFDU6	Succ/Rot-YFDU7	Succ/Rot-YFDu8	Succ/Rot-YFDu9	Succ/Rot-YFDu10
			1.30951	-0.328707	-0.409266	0.46875	-0.286951	-0.149211	-0.291589	-0.423418	0.143885	0.687409	-0.805105		0.926174	-0.45033	0.380246	0.0694027	0.397674	-0.836613	-0.0899862	-0.54543	2.60047	2.34306			0.386994	-0.27306	-0.372105	-0.0887958	-0.178313	-0.373251	-0.519035	-0.905596	-0.636032	0.0432938		-0.0925543	2.83782	-0.621747	1.01141	-0.2598	0.124506	0.507353	0.652157	1.59188	0.0680157
			5.75478	-0.13487	-0.143199	1.07302	0.22521	0.173997	-0.198817	-0.184306	0.123713	0.926933	-0.166851		0.687424	-0.378923	0.672193	0.165424	0.680498	-0.727774	-0.0691578	-0.689646	1.24405	2.45428			0.349256	0.173348	-0.282244	-0.149741	-0.1223	-0.211047	0.237712	-0.733083	-0.830477	0.470455		-0.179167	1.29654	-0.520997	0.889168	0.0982843	0.320299	0.25261	0.315528	0.377	0.147564
			10.1948	-0.287371	0.0161628	1.68287	0.424794	0.42779	-0.200899	-0.218381	0.349854	0.750243	-0.00959879		0.675888	-0.318722	1.11804	0.298478	0.888902	-0.700765	1.06526	-0.599991	0.901615	1.38619			0.382389	0.305399	0.0699056	-0.15537	-0.0466381	-0.0840328	0.212985	-0.629406	-0.795249	0.410815		-0.0141174	1.14316	-0.377934	0.783066	0.505424	0.334837	0.0964921	-0.208673	0.522275	0.0164118
			14.725	2.53058	4.05178	3.10389	2.381	2.07617	1.17807	1.60378	2.39318	1.02548	1.23739		1.45703	1.66225	2.17435	3.08426	1.50268	1.73148	2.82025	4.12386	1.34652	0.900019			1.66492	2.39737	1.66204	0.984478	2.54243	2.01101	1.7136	0.330394	-0.72505	-0.107713		7.5738	9.07693	1.94416	3.33064	2.99296	12.4517	3.16377	1.64322	1.52969	-0.0850402
			19.1682	2.10989	2.55968	2.51195	1.8571	2.05988	1.2457	1.1277	1.51898	1.33076	1.13118		1.26559	1.7484	2.05956	2.37727	1.50835	1.38801	2.37519	3.64417	1.4829	1.26178			1.37961	1.86468	1.17335	0.561905	1.68683	1.59087	1.37029	-0.54728	-0.314283	0.607		6.81756	7.07264	1.46143	2.86372	2.31846	9.7613	2.4873	1.61146	1.3834	0.766935
			23.6072	1.60334	1.75036	1.98206	1.48173	1.64114	0.606007	0.779795	1.50518	1.18678	1.01277		1.13902	1.48729	1.98175	1.92543	0.95684	1.03146	1.89472	3.02425	1.32305	1.76746			1.26423	1.30465	0.923288	0.388932	0.975795	1.21114	0.955043	0.341624	-0.509476	0.438706		6.09138	5.68938	1.11759	2.5329	1.7475	7.75175	2.78122	1.22585	1.44093	0.711866
			28.1345	1.01746	0.481904	0.865763	1.06625	0.571249	0.931203	0.868527	-0.192982	0.166065	-0.699212		1.37125	1.42033	1.28165	-0.0512798	-0.278014	-0.215231	1.88748	1.46922	1.48876	0.927322			0.773	0.502006	0.94177	0.749826	0.083039	0.688817	0.374218	-0.325503	-0.453836	1.27225		0.521388	0.86378	0.63981	0.509394	1.37137	0.533648	0.399563	0.0475198	-0.232285	-0.0383915
			32.5764	0.966848	0.829203	0.875809	0.964555	1.6194	1.14969	0.668398	0.195319	0.058137	-0.173799		0.879891	1.3182	0.84959	0.130583	0.172547	0.0444392	1.67548	1.2147	1.75218	0.921053			0.704055	0.478281	0.928947	0.472028	0.425492	0.694403	0.439245	-0.402711	-0.421777	0.935939		0.553772	0.951255	0.655317	0.623322	0.931749	0.53628	0.639733	0.515187	0.195123	0.414771
			37.0162	0.830749	1.22249	0.869288	0.738316	0.529299	0.618197	0.431527	-0.0934641	0.216187	-0.0864799		0.67537	1.01946	0.500336	0.376098	0.361633	0.161508	1.02376	0.967217	1.409	0.60009			0.683784	0.524118	0.73665	0.547472	0.586991	0.645179	0.401991	0.150963	-0.658263	0.317263		0.553621	1.0066	1.00845	0.503723	0.822773	0.859315	0.757729	0.589415	0.313132	0.583066
			41.5417	1.91155	0.351279	1.73789	0.643583	1.28876	2.65526	0.699371	1.1757	3.53264	1.37841		2.53345	0.152579	1.80148	1.13006	0.568463	2.41004	0.796555	1.48068	3.29514	1.81913			2.53991	4.09975	4.14167	4.15558	0.430585	7.00639	5.14301	2.92971	5.26065	2.83789		3.69574	4.88529	3.61075	4.39429	1.19915	7.68186	4.63141	5.45843	5.9071	2.07718
			45.9833	2.11698	-0.0150785	1.44958	0.808932	0.299585	2.90592	0.602234	1.51692	3.74976	1.45101		2.69258	0.225051	1.12737	0.994008	0.338029	2.43315	0.8096	1.79426	4.34732	1.80483			2.08246	4.2539	3.78749	4.32743	0.37371	6.74318	5.21148	3.11484	5.76379	2.60662		3.28117	4.72926	3.86893	4.13885	1.23702	7.09758	4.62494	5.53355	6.51574	2.12743
			50.4247	2.13705	-0.043254	1.30994	0.748368	0.380008	2.8006	0.527312	1.55178	4.22664	0.996367		2.76403	0.0672258	1.12208	0.98326	0.32695	2.35417	0.943155	1.84314	5.20671	1.69809			1.87181	4.0207	3.50884	3.82721	0.295724	5.90373	4.86743	2.53615	5.30448	2.23336		2.92737	4.44428	3.71557	3.93806	0.962987	6.4123	4.78918	4.93681	6.49807	1.962
			54.9453	-0.00737233	-0.624696	0.731368	0.586152	0.828472	0.464339	0.00443527	0.334296	0.597852	-0.82216		0.813749	-0.162422	0.516987	0.411651	-0.446082	-0.0683174	-0.706491	-0.0994638	2.08493	0.458374			-0.0469325	0.513473	-0.281733	-0.899112	0.92627	0.795779	0.666318	-0.856202	-0.250583	-0.0287609		0.263696	0.839364	0.184521	0.280715	0.24863	0.779038	0.546798	-0.122224	0.644209	0.174311
			59.3894	0.0144239	0.436999	0.660763	0.692637	0.24615	0.351526	-0.197204	0.178552	0.0903635	-0.693598		0.392497	0.314161	0.682062	0.243469	-0.334535	0.00554897	-0.242542	0.0865743	0.997616	0.221312			0.0583032	0.526708	-0.149969	-0.542061	0.338075	0.500538	0.562426	-0.412115	-0.674395	0.0456351		0.396193	0.943822	0.198731	0.270219	0.191706	0.8313	0.622395	-0.490614	0.24369	0.0304878
			63.8401	0.129379	0.529834	0.671942	0.504676	0.101206	0.376727	-0.589926	-0.309838	-0.0300678	-0.816884		0.392949	-0.294796	0.613841	0.272381	-0.325555	0.0830201	0.00936687	0.25125	0.90607	0.276091			0.122976	0.484913	-0.0293358	-0.0964074	-0.163934	0.819627	0.688009	-0.285409	-0.691289	0.207433		0.352971	0.97536	0.212321	0.337287	-0.114432	0.718619	0.644847	-0.654252	0.210001	0.38078
	Complex Linked Resp. Avg/ug pro:			YMDU1	YMDU2	YMDU3	YMDU4	YMDU5	YMDU6	YMDU7	YMDU8	YMDU9	YMDU10														YFDU1	YFDU2	YFDU3	YFDU4	YFDU5	YFDU6	YFDU7	YFDU8	YFDU9	YFDU10
			CI	2.08127	2.78727	2.53263	1.90661	1.92573	1.00992	1.17042	1.80578	1.18101	1.12711													CI	1.43625	1.85557	1.25289	0.645105	1.73502	1.60434	1.34631	0.0415793	-0.51627	0.312664
			CII	1.28721	1.63265	2.07189	2.46232	1.32262	1.38365	2.36338	3.59743	1.38415	1.30975													CII	6.82758	7.27965	1.50773	2.90909	2.35298	9.98826	2.81076	1.49351	1.45134	0.464587
			CIV	2.35927	0.122967	1.42472	0.884702	0.533633	2.59319	0.729705	1.56041	4.0597	1.52464													CIV_avg	2.73308	4.40553	3.77221	4.13024	0.749862	6.80751	4.87791	4.08491	5.87497	2.30741
	Biological Sample Avg/MTDR:		Time (minutes)	NADH-YMDU1	NADH-YMDU2	NADH-YMDU3	NADH-YMDU4	NADH-YMDU5	NADH-YMDU6	NADH-YMDU7	NADH-YMDU8	NADH-YMDu9	NADH-YMDu10		Succ/Rot-YMDU1	Succ/Rot-YMDU2	Succ/Rot-YMDU3	Succ/Rot-YMDU4	Succ/Rot-YMDU5	Succ/Rot-YMDU6	Succ/Rot-YMDU7	Succ/Rot-YMDU8	Succ/Rot-YMDu9	Succ/Rot-YMDu10			NADH-YFDU1	NADH-YFDU2	NADH-YFDU3	NADH-YFDU4	NADH-YFDU5	NADH-YFDU6	NADH-YFDU7	NADH-YFDu8	NADH-YFDu9	NADH-YFDu10		Succ/Rot-YFDU1	Succ/Rot-YFDU2	Succ/Rot-YFDU3	Succ/Rot-YFDU4	Succ/Rot-YFDU5	Succ/Rot-YFDU6	Succ/Rot-YFDU7	Succ/Rot-YFDu8	Succ/Rot-YFDu9	Succ/Rot-YFDu10
			1.30951	-0.000481311	-0.000365606	0.00034538	-0.000267983	-0.000144523	-0.000317379	-0.000286121	6.45816e-05	0.000347435	-0.000553356		0.00135616	-0.000402289	0.00028017	6.48151e-05	0.000385179	-0.00091061	-6.08073e-05	-0.000244813	0.00131435	0.0016104			0.000757237	-0.000230984	-0.000369035	-5.90861e-05	-0.000223287	-0.000382304	-0.000496665	-0.0008181	-0.000438991	3.53614e-05		-0.000181103	0.00240054	-0.000616617	0.000673005	-0.000325328	0.000127526	0.000485487	0.000589148	0.00109872	5.55536e-05
			5.75478	-0.000197484	-0.000127923	0.000790611	0.000210324	0.00016853	-0.000216401	-0.000124543	5.55278e-05	0.000468497	-0.000114678		0.00100657	-0.0003385	0.000495279	0.000154489	0.000659116	-0.000792144	-4.67326e-05	-0.000309543	0.000628778	0.00168685			0.000683394	0.000146636	-0.000279915	-9.96403e-05	-0.000153147	-0.000216166	0.000227467	-0.000662255	-0.000573197	0.000384257		-0.000350579	0.00109676	-0.000516698	0.000591666	0.000123074	0.000328068	0.000241723	0.000285042	0.000260207	0.000120527
			10.1948	-0.000420786	1.44386e-05	0.00123996	0.000396714	0.000414349	-0.000218668	-0.000147569	0.000157029	0.000379193	-6.59733e-06		0.000989674	-0.000284721	0.000823786	0.000278749	0.000860972	-0.000762746	0.000719838	-0.000269302	0.000455701	0.000952738			0.000748228	0.00025834	6.93288e-05	-0.000103386	-5.84012e-05	-8.6071e-05	0.000203805	-0.000568595	-0.000548883	0.000335544		-2.76238e-05	0.000967012	-0.000374816	0.000521064	0.000632904	0.000342958	9.23334e-05	-0.000188512	0.000360475	1.34048e-05
			14.725	0.00370542	0.00361953	0.00228698	0.00222361	0.00201094	0.00128226	0.00108374	0.00107416	0.000518306	0.000850472		0.00213347	0.00148492	0.00160209	0.00288038	0.00145547	0.00188462	0.00190575	0.00185097	0.000680566	0.000618591			0.00325778	0.00202796	0.00164833	0.000655087	0.00318369	0.00205978	0.00163974	0.000298472	-0.000500431	-8.79771e-05		0.0148198	0.00767826	0.00192812	0.00221626	0.00374785	0.0127537	0.00302741	0.00148445	0.0010558	-6.94589e-05
			19.1682	0.00308942	0.00228661	0.00185083	0.00173434	0.00199516	0.00135588	0.00076203	0.000681784	0.000672603	0.000777467		0.00185315	0.00156188	0.00151751	0.00222013	0.00146095	0.00151078	0.00160501	0.00163566	0.000749495	0.000867233			0.00269951	0.00157735	0.00116366	0.0003739	0.00211228	0.00162946	0.00131123	-0.000494403	-0.000216919	0.000495784		0.01334	0.00598281	0.00144938	0.00190557	0.00290323	0.00999805	0.0023801	0.00145577	0.000954823	0.000626414
			23.6072	0.00234771	0.00156363	0.0014604	0.00138378	0.00158958	0.000659607	0.000526939	0.000675588	0.000599832	0.000696084		0.00166782	0.00132862	0.00146017	0.00179816	0.000926776	0.00112269	0.00128034	0.00135741	0.000668705	0.00121479			0.00247373	0.00110361	0.000915669	0.000258802	0.00122191	0.00124051	0.000913882	0.000308617	-0.000351641	0.000358324		0.0119191	0.0048127	0.00110837	0.00168543	0.00218826	0.00793977	0.00266136	0.00110741	0.000994534	0.000581436
			28.1345	0.00148983	0.000430494	0.000637904	0.00099577	0.0005533	0.00101357	0.000586898	-8.66185e-05	8.3934e-05	-0.000480575		0.00200786	0.00126881	0.000944332	-4.78901e-05	-0.000269279	-0.000234268	0.00127545	0.00065945	0.000752458	0.000637356			0.00151254	0.000424652	0.000933999	0.000498946	0.000103983	0.000705523	0.00035809	-0.000294054	-0.000313239	0.00103914		0.00102021	0.000730679	0.00063453	0.000338959	0.00171727	0.000546592	0.000382342	4.29286e-05	-0.000160323	-3.13573e-05
			32.5764	0.00141572	0.000740743	0.000645305	0.000900797	0.00156851	0.00125138	0.000451663	8.76675e-05	2.9384e-05	-0.000119454		0.00128839	0.00117757	0.000625987	0.000121951	0.000167125	4.83698e-05	0.00113219	0.00054521	0.000885599	0.000633048			0.00137764	0.000404582	0.000921282	0.000314095	0.000532811	0.000711245	0.000420314	-0.000363802	-0.000291111	0.000764453		0.00108358	0.000804675	0.00064991	0.000414768	0.00116676	0.000549287	0.000612161	0.000465411	0.000134674	0.000338776
			37.0162	0.00121643	0.00109208	0.000640501	0.000689513	0.000512668	0.000672875	0.0002916	-4.19507e-05	0.000109267	-5.94384e-05		0.000988916	0.000910708	0.000368653	0.000351237	0.00035027	0.000175793	0.000691798	0.000434129	0.000712148	0.000412447			0.00133797	0.000443357	0.000730571	0.000364296	0.000735043	0.000660827	0.000384665	0.000136378	-0.000454335	0.000259133		0.00108328	0.000851489	0.00100013	0.000335185	0.00103029	0.000880157	0.000725072	0.000532468	0.000216125	0.000476235
			41.5417	0.002799	0.000313805	0.0012805	0.000601042	0.00124827	0.00289011	0.000472593	0.000527703	0.00178549	0.000947391		0.00370963	0.000136302	0.00132735	0.00105536	0.000550602	0.00262321	0.000538264	0.000664593	0.00166545	0.0012503			0.00496988	0.00346801	0.00410749	0.00276519	0.000539189	0.00717632	0.00492135	0.00264665	0.00363091	0.00231793		0.00723153	0.00413251	0.00358096	0.00292403	0.0015016	0.00786818	0.0044318	0.00493105	0.0040771	0.00169659
			45.9833	0.00309981	-1.34699e-05	0.00106806	0.00075546	0.000290172	0.00316294	0.000406953	0.00068086	0.00189523	0.000997294		0.00394263	0.000201042	0.000830655	0.000928302	0.000327408	0.00264836	0.000547079	0.000805342	0.00219726	0.00124047			0.00407478	0.00359841	0.00375624	0.00287954	0.000467969	0.00690673	0.00498688	0.00281389	0.00397818	0.00212903		0.00642033	0.00400052	0.00383701	0.00275405	0.00154902	0.00726973	0.00442561	0.00499892	0.00449718	0.00173764
			50.4247	0.00312919	-3.86397e-05	0.000965178	0.0006989	0.000368068	0.00304831	0.000356326	0.000696504	0.00213626	0.000684812		0.00404725	6.00542e-05	0.00082676	0.000918265	0.000316677	0.00256238	0.000637327	0.000827279	0.00263161	0.00116711			0.00366261	0.00340115	0.00347988	0.00254669	0.000370313	0.00604693	0.00465765	0.00229111	0.00366117	0.00182416		0.00572803	0.00375946	0.00368491	0.00262045	0.00120587	0.00656782	0.00458277	0.00445983	0.00448498	0.00160252
			54.9453	-1.0795e-05	-0.000558053	0.00053888	0.000547407	0.000802441	0.000505409	2.99709e-06	0.000150047	0.00030217	-0.000565078		0.00119154	-0.000145095	0.000380922	0.000384441	-0.000432066	-7.43599e-05	-0.000477404	-4.46436e-05	0.00105378	0.000315044			-9.18336e-05	0.000434351	-0.000279409	-0.000598283	0.0011599	0.00081508	0.000637601	-0.000773479	-0.000172953	-2.34912e-05		0.000515978	0.000710026	0.000182998	0.000186792	0.00031134	0.000797933	0.000523232	-0.000110415	0.000444635	0.000142373
			59.3894	2.11203e-05	0.00039038	0.000486857	0.000646853	0.000238416	0.000382617	-0.000133259	8.0142e-05	4.56722e-05	-0.000476716		0.000574717	0.000280646	0.000502551	0.000227376	-0.000324024	6.03976e-06	-0.000163896	3.88583e-05	0.000504222	0.000152109			0.000114083	0.000445547	-0.000148731	-0.000360696	0.000423346	0.000512679	0.000538186	-0.000372298	-0.000465469	3.72737e-05		0.000775239	0.000798388	0.000197091	0.000179808	0.000240058	0.000851463	0.000595571	-0.000443212	0.000168195	2.49017e-05
			63.8401	0.000189445	0.000473311	0.000495094	0.000471316	9.80261e-05	0.000410048	-0.000398636	-0.000139068	-1.51971e-05	-0.000561451		0.000575379	-0.000263347	0.000452285	0.000254376	-0.000315326	9.0363e-05	6.32956e-06	0.000112772	0.000457952	0.00018976			0.000240629	0.000410193	-2.90937e-05	-6.4151e-05	-0.000205282	0.000839507	0.000658356	-0.000257834	-0.00047713	0.000169426		0.000690665	0.000825066	0.000210569	0.000224436	-0.000143294	0.000736049	0.000617055	-0.00059104	0.000144944	0.000311012
	Complex Linked Resp. Avg/MTDR:			YMDU1	YMDU2	YMDU3	YMDU4	YMDU5	YMDU6	YMDU7	YMDU8	YMDU9	YMDU10														YFDU1	YFDU2	YFDU3	YFDU4	YFDU5	YFDU6	YFDU7	YFDU8	YFDU9	YFDU10
			CI	0.00304752	0.00248993	0.00186607	0.00178058	0.00186522	0.00109925	0.000790903	0.000810512	0.000596913	0.000774675													CI	0.00281034	0.00156964	0.00124255	0.000429263	0.00217263	0.00164325	0.00128828	3.75621e-05	-0.000356331	0.000255377
			CII	0.00188481	0.00145848	0.00152659	0.00229956	0.00128107	0.00150603	0.00159703	0.00161468	0.000699589	0.000900206													CII	0.0133596	0.00615792	0.00149529	0.00193575	0.00294645	0.0102305	0.00268962	0.00134921	0.00100172	0.000379464
			CIV	0.00345458	0.000109849	0.00104975	0.000826222	0.000516866	0.00282255	0.00049309	0.00070038	0.00205188	0.0010479													CIV_avg	0.00534786	0.00372668	0.00374108	0.00274833	0.000938995	0.00697262	0.00466768	0.00369024	0.00405492	0.00188464
	MTDR (Mito. Content, RFU)/well:			YMDU1	YMDU2	YMDU3	YMDU4	YMDU5	YMDU6	YMDU7	YMDU8	YMDU9	YMDU10														YFDU1	YFDU2	YFDU3	YFDU4	YFDU5	YFDU6	YFDU7	YFDU8	YFDU9	YFDU10
			predicted MTDR in seahorse well	6829.4	11194.2	13572	10707.8	10324.4	9187.4	14798.6	17823.6	15828.2	11639.6													predicted MTDR in seahorse well	5110.6	11821.6	10083.2	15028.2	7985.8	9763.2	10450.4	8855.6	11590.8	9794.6
[truncated: 74 more columns]

## Sheet: Young-Eye
SMAPLE INFORMATION:	All data from Seahorse Machine:		Time (minutes)	NADH-YMEY1			Succ/Rot-YMEY1			NADH-YMEY2			Succ/Rot-YMEY2			NADH-YMEY3			Succ/Rot-YMEY3			NADH-YMEY4			Succ/Rot-YMEY4			NADH-YMEY5			Succ/Rot-YMEY5			NADH-YMEY6			Succ/Rot-YMEY6			NADH-YMEY7			Succ/Rot-YMEY7			NADH-YMEY8			Succ/Rot-YMEY8
Tissue: Eyes			1.30951	3.96283	3.4009	7.42133	-5.15557	1.51297	22.0063	-0.949301	-5.0839	0.915728	2.14314	9.31227	9.79519	7.33765	7.67945	21.2754	-0.34984	27.1044	10.168	10.7133	11.9001	13.7889	14.1316	15.2232	8.90697	2.84911	5.31729	3.36876	7.0826	14.4402	7.49862	1.73549	30.9805	5.26376	5.67685	12.9256	9.91745	-0.70161	-5.13348	1.76469	-0.105631	3.41532	5.64346	3.42458	-1.092	11.0075	0.818083
Tissue prep: Frozen			5.75478	3.09381	2.15795	3.16852	-5.69651	4.45283	8.36534	5.43742	8.08403	0.675559	7.10951	7.4964	17.8677	7.52455	13.3409	24.6321	-0.812755	28.0173	12.1809	9.46692	20.0759	10.9897	16.9151	10.5467	8.72473	6.63572	3.3254	5.16649	40.51	14.5914	8.14588	2.34564	30.7779	-0.054219	3.42685	14.3463	8.01421	0.738475	9.04948	9.064	1.96101	5.79809	9.99144	6.43776	1.80846	9.37132	1.94168
Entire region, bilateral			10.1948	3.19792	2.3341	2.04203	-4.46136	14.9931	16.6698	4.84217	9.30591	5.09882	2.68201	7.84166	17.7461	6.12135	13.8076	24.0672	-1.8513	24.3814	12.964	10.7301	18.8094	8.3268	14.4709	10.2642	7.28263	6.93569	3.80759	7.84247	30.1114	13.0326	11.4592	1.80887	21.822	4.66118	3.08401	23.4512	15.3691	0.149869	8.4238	2.58694	0.658371	12.194	12.1127	5.75988	0.738712	9.41547	2.75197
2 mL 1X MAS used			14.725	-7.45406	12.607	16.9299	20.495	21.8226	32.8301	-6.68611	8.60358	14.7705	23.0522	21.6543	32.4143	9.65601	17.6761	29.8096	24.9659	9.81407	54.7199	30.5552	23.9043	19.168	32.105	37.7657	40.1814	1.31692	0.278557	9.35791	30.9882	19.047	13.7975	8.93063	18.3438	9.80987	9.94147	30.6562	20.3234	-0.745441	26.302	0.932527	13.0836	19.3462	26.7699	13.7491	21.3453	27.8078	26.3179
7 ml homogenizer used			19.1682	-5.49957	11.3642	15.1332	22.2819	22.1605	35.2867	-4.76141	8.22531	14.4315	24.0963	22.9521	34.9033	8.3726	15.7305	26.7326	28.4231	7.78459	49.7409	24.9449	18.7267	16.17	34.0912	35.1739	41.0465	1.48972	-1.08329	9.37312	30.0442	24.4732	16.2269	7.65137	20.9228	12.258	11.7227	31.8637	21.1355	-1.78505	20.6535	0.694252	18.4418	20.3364	27.2942	11.1732	20.6011	24.7117	28.0382
Sex: male and female			23.6072	-6.09461	8.7403	13.3691	23.3565	23.2201	34.6078	-4.0811	8.58647	14.8129	24.7972	24.2943	34.3796	8.64103	15.7528	25.9846	32.2997	6.72077	45.46	20.1033	17.5078	16.8601	34.2717	31.9453	40.5291	2.87542	-0.924712	10.6338	29.9117	25.4219	16.9418	7.35545	21.1565	12.7841	13.2444	31.4448	20.7383	-2.80282	19.9765	-0.623863	18.0037	20.8963	25.8347	11.2623	20.0904	23.5054	28.9779
Strain: C57BL/6J			28.1345	-1.49325	-0.552658	1.11148	-5.10018	-0.188795	8.42059	-0.518328	3.24135	-1.62996	-0.722783	1.32594	13.0687	0.672668	0.616606	15.2299	1.0197	10.991	16.7989	3.94832	5.48402	1.281	4.20102	4.86772	12.6811	1.91403	-4.54673	5.084	22.3051	20.2752	7.39878	4.75719	20.8417	5.25664	0.244004	25.0705	11.2066	-4.48468	10.9966	-3.78303	0.680336	5.89307	9.82828	-9.36494	2.70325	4.12315	-3.17904
Diet: Standard Chow			32.5764	-3.76897	-3.87169	0.235761	-6.04188	0.275859	7.77811	-2.13937	-0.259547	-2.54438	-2.54572	-0.774559	11.8822	-2.38975	-0.322754	13.2855	1.01328	7.36614	13.8509	3.53996	4.20869	-0.872139	2.83308	7.10453	12.0057	0.192738	-5.71193	3.2558	19.2078	18.7238	5.6301	1.58782	17.9906	3.72428	1.5745	18.0904	9.46048	-4.59298	9.47023	-6.08586	-0.607051	2.6201	9.86378	-9.73724	1.17927	1.18221	-4.40532
Age: 10 weeks			37.0162	-3.46253	-4.81751	-0.468083	-5.88563	0.310669	7.69035	-3.66289	-1.16826	-2.71937	-1.31984	-0.040105	11.9946	-3.86755	-0.629472	13.1654	0.425765	7.34747	12.7911	2.98159	7.90367	-1.78918	2.9569	6.34711	11.3041	0.428899	-6.87293	2.4173	20.3104	18.5294	5.27465	1.07685	16.5556	2.3889	2.21089	16.8781	10.5451	-6.37913	8.15313	-6.95518	0.07747	2.6345	9.49623	-11.1196	-0.359163	3.4738	-3.34168
Protein used: 15 ug/well			41.5417	0.209534	17.7842	30.3638	34.0282	30.2589	36.2075	5.07966	25.9634	27.7053	37.0573	28.8994	34.6606	38.4459	45.7261	56.1666	49.3831	46.8462	43.4492	61.7564	42.5703	32.8738	46.0121	32.2033	37.2343	8.68349	9.08536	19.7343	36.1651	23.0053	18.6798	28.1934	20.471	24.8129	19.2374	29.0966	23.9448	14.817	28.5864	15.8549	24.9115	26.3876	29.8184	39.5415	50.4792	42.4366	38.8104
			45.9833	1.42233	19.8435	32.2912	38.0413	33.0831	35.9414	7.62966	28.6039	32.5478	42.2515	32.4666	42.4581	43.4659	50.7984	58.9424	56.9044	51.5232	47.4538	68.852	44.2004	35.4509	52.1535	35.526	41.7745	10.0306	10.1038	21.2548	38.9272	23.7013	22.405	31.6962	24.7201	25.6167	22.4803	31.0832	25.4778	17.5198	32.1711	22.8178	28.2485	27.4333	31.0132	45.9097	54.7974	54.9405	45.9411
SHEET LEGEND:			50.4247	1.52577	19.4393	32.2331	38.8739	33.1039	35.7805	9.75067	30.7701	36.2197	46.6668	34.5548	42.9828	44.6512	51.9661	59.6454	59.9971	53.3451	49.7532	69.9479	44.0829	35.2656	54.4116	36.9377	42.1524	12.2862	11.8557	22.311	39.5344	24.1648	22.9577	33.5722	27.229	27.2244	24.6437	32.9566	27.0545	18.6315	34.0732	21.3976	30.1389	29.2411	31.769	50.5115	56.8876	54.849	50.0377
YM = Young Male			54.9453	2.95881	2.05941	5.915	2.25498	5.83239	13.7444	-1.71069	17.9085	8.94502	11.3069	6.25826	19.4662	7.63605	9.11117	21.7722	15.4043	16.4383	16.9586	14.6618	24.7101	4.20286	12.6984	5.06097	8.06062	-0.35108	-2.38837	1.71883	22.3679	6.24938	8.41127	12.5825	13.0403	6.16343	6.9252	14.9161	7.92229	-2.15879	12.4001	-3.00687	4.56456	27.2064	10.37	4.5439	15.5052	9.63576	8.57169
YF = Young Female			59.3894	2.44896	1.20943	5.15293	0.83094	4.50821	13.0839	-1.81701	14.95	3.80405	5.8056	2.86783	16.9991	4.58607	7.52581	19.3956	9.30332	12.8183	16.0951	12.2726	20.8781	2.35489	8.5513	2.88438	7.10908	-0.253043	-3.48245	0.638545	14.9526	7.09919	9.10622	8.73373	13.8477	3.47065	4.37348	13.654	6.50081	-2.20113	12.4078	-3.85871	4.55822	21.5225	11.908	0.052323	11.7708	6.23849	4.69718
OM = Old Male			63.8401	1.54944	2.41916	4.05897	0.461472	4.299	16.3868	-2.8692	7.65522	3.26777	4.01507	2.84983	16.7867	4.27024	7.47217	18.5979	8.06164	11.674	15.863	13.2016	19.845	1.84892	6.03627	2.77728	7.46937	-0.004988	-3.45543	0.53978	18.4194	7.73379	9.86361	6.43189	13.633	3.27067	3.01522	13.0449	5.69782	-2.75313	13.2173	-5.72876	4.10541	17.3164	16.5337	0.128091	10.2842	5.31615	3.16445
OF = Old Female
EY = Eyes	Biological Sample Average:		Time (minutes)	NADH-YMEY1	NADH-YMEY2	NADH-YMEY3	NADH-YMEY4	NADH-YMEY5	NADH-YMEY6	NADH-YMEY7	NADH-YMEY8	NADH-YMEY9	NADH-YMEY10		Succ/Rot-YMEY1	Succ/Rot-YMEY2	Succ/Rot-YMEY3	Succ/Rot-YMEY4	Succ/Rot-YMEY5	Succ/Rot-YMEY6	Succ/Rot-YMEY7	Succ/Rot-YMEY8	Succ/Rot-YMEY9	Succ/Rot-YMEY10			NADH-YFEY1	NADH-YFEY2	NADH-YFEY3	NADH-YFEY4	NADH-YFEY5	NADH-YFEY6	NADH-YFEY7	NADH-YFEY8	NADH-YFEY9	NADH-YFEY10		Succ/Rot-YFEY1	Succ/Rot-YFEY2	Succ/Rot-YFEY3	Succ/Rot-YFEY4	Succ/Rot-YFEY5	Succ/Rot-YFEY6	Succ/Rot-YFEY7	Succ/Rot-YFEY8	Succ/Rot-YFEY9	Succ/Rot-YFEY10
1, 2, 3…10 = sample number	(the average of three technical replicates per biological sample)		1.30951	4.92835	-1.70582	12.0975	12.1341	3.84506	12.6599	-1.3568	4.44669	8.82866	5.6953		6.12124	7.08353	12.3075	12.7539	9.67381	9.50662	2.98438	3.61133	10.0533	15.3427			7.91265	6.38027	4.52341	9.57447	12.3385	7.49878	14.0244	16.6748	17.3091	20.9273		6.46065	16.5731	5.23802	11.8013	7.51982	8.02775	6.28928	11.3457	12.5796	12.3667
MTDR = mitoTracker Deep Red			5.75478	2.80676	4.73234	15.1659	13.5108	5.04254	11.0231	6.28398	5.87251	9.46487	7.68254		2.37389	10.8245	13.1285	12.0622	21.0824	8.59578	5.91685	3.24656	10.1582	14.8741			8.66997	6.41623	5.17236	8.22242	10.4618	7.13536	12.6658	12.011	14.4557	14.3057		9.51836	8.6969	8.02552	12.734	8.6062	10.5889	6.5398	11.8121	15.1461	12.6061
			10.1948	2.52469	6.41563	14.6654	12.6221	6.19525	9.43069	3.7202	5.30469	8.50337	7.64236		9.06718	9.42325	11.8314	10.6726	18.2011	13.9681	8.3217	2.72809	10.9119	14.3274			8.88171	6.62237	5.90064	7.43948	8.52804	6.1133	12.594	11.077	20.8769	10.6833		8.93498	8.07304	9.60012	13.8683	9.44361	10.5223	5.4276	10.8901	14.4121	13.2898
			14.725	7.36097	5.56267	19.0472	24.5425	3.65113	12.3614	8.82969	20.9674	18.5671	14.018		25.0492	25.7069	29.8333	36.684	21.2776	20.307	19.7332	27.9802	53.9883	49.4238			13.5002	12.1708	9.339	21.2044	7.62909	9.3728	18.2218	40.17	32.8298	16.1797		35.7197	38.2572	26.7148	26.0807	4.44836	19.5818	39.9136	75.5666	57.146	34.4212
			19.1682	6.99927	5.96513	16.9452	19.9472	3.25985	13.6107	6.5209	18.8287	14.5887	10.7531		26.5763	27.3172	28.6496	36.7705	23.5815	21.574	22.0241	30.5936	52.2338	51.0667			10.3022	11.2368	8.50607	16.0166	6.8281	8.52511	16.701	35.4437	28.6758	13.1453		34.4563	39.0975	28.5911	27.853	5.66675	16.3748	40.4321	74.2815	56.7125	33.9412
			23.6072	5.33825	6.43944	16.7928	18.1571	4.19483	13.7654	5.5166	18.286	13.3737	10.0246		27.0614	27.8237	28.1602	35.582	24.0918	21.8092	21.5782	31.1801	47.7045	49.3027			10.3636	10.469	9.03903	13.9772	6.0135	9.53024	16.2206	32.0778	26.9829	12.9377		33.0889	37.8309	28.2947	26.9535	5.44649	16.5213	37.998	71.1347	55.7521	32.4735
			28.1345	-0.311476	0.364352	5.50638	3.57112	0.817101	10.2852	0.909638	-0.846176	-1.04372	-4.63659		1.04387	4.5573	9.60319	7.24996	16.6597	12.1737	5.46723	1.17065	6.42571	12.2589			0.95781	3.35326	3.92425	6.02615	3.68595	2.24414	5.69257	-0.159396	-11.1959	2.21731		10.5377	21.1216	14.8783	14.8828	4.03667	2.79697	18.1541	1.92704	0.608505	8.16827
			32.5764	-2.4683	-1.64777	3.52432	2.29217	-0.754463	7.76757	-0.402871	-2.45859	-2.48337	-4.31797		0.670696	2.85398	7.41009	7.31443	14.5206	9.70846	3.95894	-0.255594	6.85825	9.86247			-1.48987	1.13334	2.26769	5.12954	3.27508	0.415178	3.82302	-0.781826	0.577634	2.17309		10.2372	20.0583	12.9376	13.8487	2.10417	1.25997	16.1068	3.49404	-0.249367	7.64431
			37.0162	-2.91604	-2.51684	2.88948	3.03202	-1.34225	6.67378	-1.72706	-2.66831	-2.20058	-6.37388		0.70513	3.54488	6.85478	6.86936	14.7048	9.87803	4.0694	0.917786	9.10304	12.6695			-1.78086	0.210863	1.33606	4.81016	2.62048	0.109908	3.74528	0.502764	0.578673	2.45655		9.93349	21.3215	12.4751	13.6827	6.71523	1.84846	18.1396	2.13304	1.46275	7.64236
			41.5417	16.1192	19.5828	46.7796	45.7335	12.5011	24.4924	19.7527	44.1525	66.086	46.3655		33.4982	33.5391	46.5595	38.4833	25.9501	24.0929	27.0392	41.6116	53.8191	83.2143			26.4267	30.7197	12.0184	22.2914	22.1902	25.021	39.5945	73.7856	77.895	46.7962		33.6481	42.2156	29.4983	29.5559	23.416	18.4085	38.5525	114.762	109.148	51.1964
			45.9833	17.8524	22.9271	51.0689	49.5011	13.7964	27.3444	24.1696	51.8825	79.9458	54.7016		35.6886	39.0588	51.9605	43.1513	28.3445	26.3471	28.8983	49.5816	63.5692	98.5193			29.9045	33.9299	15.0978	26.0277	25.2196	27.2031	40.6208	85.0563	92.0539	56.7566		37.0737	47.968	32.358	33.4741	32.6117	18.8827	46.1484	133.135	128.487	59.0611
			50.4247	17.7327	25.5802	52.0876	49.7655	15.4843	29.3419	24.7007	54.0827	83.0616	55.8618		35.9194	41.4015	54.3651	44.5005	28.8856	28.2183	30.383	52.9391	65.8238	97.3289			30.8485	34.6727	17.6639	28.6464	26.0351	27.548	41.7195	86.1249	93.1496	57.914		38.7022	50.295	33.8429	35.8435	27.7615	18.9245	48.0333	133.535	128.135	59.9651
			54.9453	3.64441	8.38095	12.8398	14.525	-0.340208	10.5954	2.41148	9.89494	19.6977	13.0436		7.27726	12.3438	16.2671	8.60665	12.3429	9.9212	14.047	12.422	20.3044	30.7444			3.57262	8.81024	3.88573	4.01153	3.67223	8.76123	11.2245	13.3376	16.7218	12.987		8.59354	17.1881	16.1368	24.9847	7.32671	1.50557	18.825	23.433	44.4529	17.7249
			59.3894	2.93711	5.64569	10.5025	11.8352	-1.03232	8.68401	2.116	6.02054	9.41581	5.42217		6.14102	8.5575	12.7389	6.18158	10.386	8.17611	12.6629	6.9527	13.2098	17.33			1.96019	6.1285	3.77426	2.59285	3.16561	9.51988	9.02072	7.37154	9.20311	6.01966		8.31284	12.4141	13.1124	12.0047	3.50568	1.41242	15.2344	15.6223	22.4787	11.5224
			63.8401	2.67586	2.6846	10.1134	11.6319	-0.973545	7.77851	1.57848	5.24282	7.43926	5.09427		7.0491	7.88388	11.8662	5.42764	12.0056	7.25266	12.6518	6.67901	11.1588	17.4997			1.98	5.55859	5.19537	3.00779	3.11399	8.15132	8.59622	6.85497	8.84604	3.18922		8.1208	12.7116	11.7699	11.3388	3.81147	1.24464	14.0403	16.2513	18.8135	9.91259
	Complex Linked Resp. Averages:			YMEY1	YMEY2	YMEY3	YMEY4	YMEY5	YMEY6	YMEY7	YMEY8	YMEY9	YMEY10														YFEY1	YFEY2	YFEY3	YFEY4	YFEY5	YFEY6	YFEY7	YFEY8	YFEY9	YFEY10
	(average of three consectutive time points)		CI	6.56616	5.98908	17.5951	20.8823	3.70194	13.2458	6.95573	19.3607	15.5098	11.5986													CI	11.3887	11.2922	8.96137	17.0661	6.82356	9.14272	17.0478	35.8971	29.4962	14.0875
			CII	26.229	26.9493	28.881	36.3455	22.9836	21.2301	21.1119	29.9179	51.3089	49.9311													CII	34.4216	38.3952	27.8669	26.9624	5.1872	17.4926	39.4479	73.6609	56.5369	33.612
			CIV	26.1351	30.3482	50.4702	45.1892	20.827	26.6395	25.8239	49.0417	68.7176	72.6652													CIV	32.7673	39.9668	23.4132	29.3065	26.2057	22.6646	42.4448	104.4	104.812	55.2816
	Biological Sample Avg/ug pro:		Time (minutes)	NADH-YMEY1	NADH-YMEY2	NADH-YMEY3	NADH-YMEY4	NADH-YMEY5	NADH-YMEY6	NADH-YMEY7	NADH-YMEY8	NADH-YMEY9	NADH-YMEY10		Succ/Rot-YMEY1	Succ/Rot-YMEY2	Succ/Rot-YMEY3	Succ/Rot-YMEY4	Succ/Rot-YMEY5	Succ/Rot-YMEY6	Succ/Rot-YMEY7	Succ/Rot-YMEY8	Succ/Rot-YMEY9	Succ/Rot-YMEY10			NADH-YFEY1	NADH-YFEY2	NADH-YFEY3	NADH-YFEY4	NADH-YFEY5	NADH-YFEY6	NADH-YFEY7	NADH-YFEY8	NADH-YFEY9	NADH-YFEY10		Succ/Rot-YFEY1	Succ/Rot-YFEY2	Succ/Rot-YFEY3	Succ/Rot-YFEY4	Succ/Rot-YFEY5	Succ/Rot-YFEY6	Succ/Rot-YFEY7	Succ/Rot-YFEY8	Succ/Rot-YFEY9	Succ/Rot-YFEY10
			1.30951	0.328557	-0.113722	0.806501	0.80894	0.256337	0.843995	-0.0904533	0.296446	0.588577	0.379686		0.408083	0.472236	0.820502	0.850262	0.644921	0.633775	0.198959	0.240755	0.670221	1.02284			0.52751	0.425352	0.301561	0.638298	0.822568	0.499919	0.93496	1.11165	1.15394	1.39515		0.43071	1.10487	0.349201	0.78675	0.501321	0.535183	0.419285	0.756382	0.83864	0.824446
			5.75478	0.187117	0.315489	1.01106	0.900723	0.336169	0.734873	0.418932	0.391501	0.630991	0.512169		0.158259	0.721635	0.875232	0.804145	1.40549	0.573052	0.394456	0.216437	0.677216	0.991607			0.577998	0.427749	0.344824	0.548161	0.697451	0.475691	0.844384	0.800731	0.963711	0.953714		0.634557	0.579794	0.535035	0.848931	0.573746	0.705924	0.435987	0.787476	1.00974	0.840408
			10.1948	0.168312	0.427709	0.977691	0.841472	0.413017	0.628712	0.248014	0.353646	0.566891	0.50949		0.604479	0.628217	0.788757	0.711504	1.2134	0.931206	0.55478	0.181873	0.727457	0.955157			0.592114	0.441491	0.393376	0.495965	0.568536	0.407553	0.839598	0.738464	1.39179	0.712217		0.595665	0.538203	0.640008	0.924557	0.629574	0.701487	0.36184	0.726006	0.960805	0.885983
			14.725	0.490731	0.370845	1.26981	1.63617	0.243408	0.824096	0.588646	1.39783	1.23781	0.934532		1.66995	1.71379	1.98889	2.4456	1.41851	1.3538	1.31555	1.86534	3.59922	3.29492			0.900011	0.81139	0.6226	1.41363	0.508606	0.624853	1.21479	2.678	2.18865	1.07864		2.38131	2.55048	1.78098	1.73871	0.296558	1.30546	2.66091	5.03778	3.80973	2.29475
			19.1682	0.466618	0.397675	1.12968	1.32981	0.217323	0.907382	0.434726	1.25525	0.972582	0.716874		1.77176	1.82115	1.90997	2.45137	1.5721	1.43827	1.46828	2.03957	3.48226	3.40445			0.686816	0.74912	0.567071	1.06778	0.455207	0.568341	1.1134	2.36291	1.91172	0.876352		2.29709	2.6065	1.90607	1.85687	0.377783	1.09165	2.69547	4.9521	3.78084	2.26275
			23.6072	0.355884	0.429296	1.11952	1.21047	0.279656	0.917691	0.367773	1.21907	0.891579	0.668304		1.8041	1.85491	1.87735	2.37213	1.60612	1.45394	1.43855	2.07867	3.1803	3.28685			0.690909	0.697933	0.602602	0.931812	0.4009	0.635349	1.08137	2.13852	1.79886	0.862512		2.20592	2.52206	1.88631	1.7969	0.363099	1.10142	2.5332	4.74231	3.71681	2.1649
			28.1345	-0.0207651	0.0242901	0.367092	0.238074	0.0544734	0.685679	0.0606425	-0.0564118	-0.0695816	-0.309106		0.0695916	0.30382	0.640213	0.483331	1.11065	0.811581	0.364482	0.0780432	0.428381	0.817262			0.063854	0.223551	0.261617	0.401743	0.24573	0.149609	0.379505	-0.0106264	-0.746396	0.147821		0.702513	1.40811	0.991883	0.992185	0.269111	0.186465	1.21027	0.12847	0.040567	0.544552
			32.5764	-0.164553	-0.109851	0.234955	0.152811	-0.0502976	0.517838	-0.0268581	-0.163906	-0.165558	-0.287865		0.044713	0.190265	0.494006	0.487629	0.968037	0.64723	0.26393	-0.0170396	0.457217	0.657498			-0.0993246	0.0755559	0.151179	0.341969	0.218339	0.0276785	0.254868	-0.0521218	0.038509	0.144873		0.682477	1.33722	0.862509	0.923245	0.140278	0.0839982	1.07379	0.232936	-0.0166245	0.509621
			37.0162	-0.194403	-0.167789	0.192632	0.202135	-0.089483	0.444919	-0.115137	-0.177887	-0.146706	-0.424925		0.0470087	0.236325	0.456985	0.457958	0.980322	0.658535	0.271293	0.0611857	0.60687	0.844631			-0.118724	0.0140576	0.0890706	0.320677	0.174699	0.00732722	0.249685	0.0335176	0.0385782	0.16377		0.662232	1.42143	0.831672	0.912182	0.447682	0.123231	1.20931	0.142203	0.097517	0.50949
			41.5417	1.07461	1.30552	3.11864	3.0489	0.833404	1.63283	1.31685	2.9435	4.40573	3.09104		2.23321	2.23594	3.10397	2.56555	1.73	1.6062	1.80261	2.77411	3.58794	5.54762			1.76178	2.04798	0.801229	1.48609	1.47935	1.66807	2.63963	4.91904	5.193	3.11975		2.24321	2.81437	1.96655	1.97039	1.56107	1.22723	2.57017	7.6508	7.27653	3.4131
			45.9833	1.19016	1.52847	3.40459	3.30007	0.919757	1.82296	1.6113	3.45884	5.32972	3.64677		2.37924	2.60392	3.46403	2.87676	1.88963	1.75647	1.92656	3.30544	4.23795	6.56795			1.99363	2.26199	1.00652	1.73518	1.68131	1.81354	2.70805	5.67042	6.13693	3.78377		2.47158	3.19787	2.1572	2.23161	2.17411	1.25884	3.07656	8.87568	8.56581	3.93741
			50.4247	1.18218	1.70535	3.4725	3.3177	1.03229	1.95613	1.64672	3.60551	5.53744	3.72412		2.39463	2.7601	3.62434	2.9667	1.92571	1.88122	2.02553	3.52928	4.38825	6.48859			2.05657	2.31151	1.17759	1.90976	1.73567	1.83653	2.7813	5.74166	6.20997	3.86093		2.58015	3.353	2.2562	2.38957	1.85077	1.26164	3.20222	8.90231	8.54236	3.99768
			54.9453	0.242961	0.55873	0.855987	0.96833	-0.0226805	0.706359	0.160765	0.659663	1.31318	0.869576		0.485151	0.822919	1.08447	0.573776	0.822858	0.661413	0.936466	0.828133	1.35362	2.04963			0.238175	0.587349	0.259048	0.267435	0.244815	0.584082	0.748301	0.889173	1.11479	0.865803		0.572903	1.14587	1.07579	1.66565	0.488447	0.100372	1.255	1.5622	2.96352	1.18166
			59.3894	0.195807	0.37638	0.700165	0.789013	-0.068821	0.578934	0.141067	0.40137	0.62772	0.361478		0.409401	0.5705	0.84926	0.412106	0.692401	0.545074	0.844194	0.463513	0.880653	1.15533			0.130679	0.408566	0.251617	0.172856	0.211041	0.634658	0.601381	0.491436	0.613541	0.40131		0.55419	0.827604	0.874157	0.800312	0.233712	0.0941612	1.01563	1.04149	1.49858	0.768158
			63.8401	0.17839	0.178973	0.674229	0.775458	-0.064903	0.518567	0.105232	0.349522	0.495951	0.339618		0.46994	0.525592	0.791081	0.361843	0.800373	0.483511	0.843456	0.445267	0.743923	1.16664			0.132	0.370573	0.346358	0.20052	0.207599	0.543421	0.573081	0.456998	0.589736	0.212615		0.541387	0.847443	0.784657	0.755923	0.254098	0.082976	0.936023	1.08342	1.25424	0.660839
	Complex Linked Resp. Avg/ug pro:			YMEY1	YMEY2	YMEY3	YMEY4	YMEY5	YMEY6	YMEY7	YMEY8	YMEY9	YMEY10														YFEY1	YFEY2	YFEY3	YFEY4	YFEY5	YFEY6	YFEY7	YFEY8	YFEY9	YFEY10
			CI	0.437744	0.399272	1.17301	1.39215	0.246796	0.883056	0.463715	1.29071	1.03399	0.773237													CI	0.759245	0.752814	0.597424	1.13774	0.454904	0.609514	1.13652	2.39314	1.96641	0.939169
			CII	1.7486	1.79662	1.9254	2.42304	1.53224	1.41534	1.40746	1.99453	3.42059	3.32874													CII	2.29477	2.55968	1.85779	1.79749	0.345813	1.16618	2.62986	4.91073	3.76912	2.2408
			CIV	1.74234	2.02322	3.36468	3.01261	1.38847	1.77597	1.72159	3.26945	4.58117	4.84435													CIV	2.18449	2.66445	1.56088	1.95377	1.74705	1.51098	2.82966	6.95998	6.98743	3.68544
	Biological Sample Avg/MTDR:		Time (minutes)	NADH-YMEY1	NADH-YMEY2	NADH-YMEY3	NADH-YMEY4	NADH-YMEY5	NADH-YMEY6	NADH-YMEY7	NADH-YMEY8	NADH-YMEY9	NADH-YMEY10		Succ/Rot-YMEY1	Succ/Rot-YMEY2	Succ/Rot-YMEY3	Succ/Rot-YMEY4	Succ/Rot-YMEY5	Succ/Rot-YMEY6	Succ/Rot-YMEY7	Succ/Rot-YMEY8	Succ/Rot-YMEY9	Succ/Rot-YMEY10			NADH-YFEY1	NADH-YFEY2	NADH-YFEY3	NADH-YFEY4	NADH-YFEY5	NADH-YFEY6	NADH-YFEY7	NADH-YFEY8	NADH-YFEY9	NADH-YFEY10		Succ/Rot-YFEY1	Succ/Rot-YFEY2	Succ/Rot-YFEY3	Succ/Rot-YFEY4	Succ/Rot-YFEY5	Succ/Rot-YFEY6	Succ/Rot-YFEY7	Succ/Rot-YFEY8	Succ/Rot-YFEY9	Succ/Rot-YFEY10
			1.30951	0.00109388	-0.000385392	0.00272761	0.00198978	0.000662804	0.00219699	-0.0002524	0.000769403	0.000895529	0.000579049		0.00135864	0.00160036	0.00277497	0.00209143	0.00166755	0.00164977	0.000555172	0.000624863	0.00101975	0.00155991			0.0014592	0.000693825	0.000746536	0.0016447	0.00296813	0.00172085	0.0030808	0.00110132	0.00133543	0.00234537		0.00119143	0.00180224	0.000864474	0.00202722	0.00180895	0.00184224	0.00138159	0.000749348	0.000970543	0.00138597
			5.75478	0.000622977	0.00106916	0.00341943	0.00221555	0.000869223	0.00191293	0.00116898	0.00101611	0.000960062	0.000781095		0.000526899	0.00244556	0.00296006	0.00197799	0.00363415	0.0014917	0.00110069	0.000561747	0.00103039	0.00151227			0.00159886	0.000697735	0.000853638	0.00141245	0.00251666	0.00163745	0.00278234	0.000793285	0.00111529	0.00160328		0.00175531	0.000945747	0.00132452	0.00218744	0.00207029	0.00242997	0.00143662	0.000780153	0.00116855	0.0014128
			10.1948	0.000560369	0.00144947	0.00330659	0.0020698	0.00106793	0.00163659	0.000692054	0.000917861	0.000862533	0.00077701		0.00201251	0.00212897	0.0026676	0.00175012	0.00313747	0.00242401	0.00154805	0.000472037	0.00110684	0.00145668			0.00163791	0.000720151	0.000973831	0.00127795	0.00205149	0.0014029	0.00276657	0.000731597	0.0016107	0.0011973		0.00164773	0.000877906	0.00158439	0.0023823	0.00227174	0.0024147	0.0011923	0.000719255	0.00111192	0.00148941
			14.725	0.00163381	0.00125676	0.00429456	0.00402455	0.000629374	0.00214519	0.00164255	0.00362795	0.00188334	0.00142523		0.00555983	0.0058079	0.00672648	0.00601555	0.00366779	0.00352405	0.00367089	0.00484136	0.00547627	0.00502499			0.00248961	0.00132352	0.00154129	0.0036425	0.00183524	0.00215091	0.00400286	0.0026531	0.00253289	0.00181329		0.00658719	0.00416029	0.00440896	0.00448014	0.00107009	0.00449372	0.00876798	0.00499093	0.00440894	0.00385767
			19.1682	0.00155353	0.00134769	0.00382062	0.003271	0.000561927	0.00236199	0.00121305	0.0032579	0.0014798	0.00109328		0.00589878	0.00617171	0.00645959	0.00602974	0.00406493	0.00374392	0.00409706	0.00529355	0.0052983	0.00519203			0.00189987	0.00122195	0.00140383	0.00275134	0.00164256	0.00195638	0.00366877	0.00234094	0.0022124	0.00147322		0.0063542	0.00425167	0.00471863	0.00478459	0.00136318	0.00375776	0.00888189	0.00490605	0.00437549	0.00380388
			23.6072	0.00118486	0.00145485	0.00378626	0.00297745	0.000723097	0.00238882	0.00102623	0.003164	0.00135655	0.00101921		0.00600645	0.00628613	0.00634925	0.00583484	0.0041529	0.00378474	0.0040141	0.00539503	0.00483888	0.00501268			0.00191119	0.00113845	0.00149179	0.002401	0.0014466	0.00218704	0.00356323	0.00211863	0.00208179	0.00144996		0.00610203	0.00411393	0.00466971	0.00463007	0.0013102	0.00379137	0.00834718	0.00469821	0.00430139	0.00363939
			28.1345	-6.9134e-05	8.23171e-05	0.00124152	0.000585602	0.00014085	0.00178488	0.000169216	-0.000146412	-0.000105869	-0.000471409		0.000231694	0.00102962	0.00216522	0.00118887	0.00287176	0.00211261	0.00101705	0.000202555	0.000651788	0.00124638			0.000176633	0.000364652	0.000647652	0.00103517	0.000886685	0.000514994	0.00125051	-1.05276e-05	-0.000863791	0.000248499		0.00194329	0.00229688	0.00245548	0.00255656	0.000971053	0.000641861	0.00398798	0.000127275	4.69475e-05	0.000915438
			32.5764	-0.000547854	-0.000372276	0.000794626	0.000375876	-0.000130053	0.00134797	-7.49444e-05	-0.000425405	-0.000251898	-0.000439014		0.000148865	0.000644792	0.00167075	0.00119944	0.00250303	0.00168479	0.000736466	-4.42249e-05	0.000695662	0.00100273			-0.000274752	0.000123245	0.000374256	0.000881152	0.000787848	9.52767e-05	0.000839818	-5.16371e-05	4.45657e-05	0.000243544		0.00188787	0.00218125	0.00213521	0.00237893	0.000506175	0.000289144	0.00353825	0.00023077	-1.92392e-05	0.000856717
			37.0162	-0.000647232	-0.000568624	0.000651487	0.0004972	-0.000231374	0.00115816	-0.000321277	-0.000461694	-0.000223215	-0.000648041		0.000156508	0.000800885	0.00154554	0.00112646	0.00253479	0.00171422	0.000757014	0.000158803	0.000923361	0.00128812			-0.000328414	2.29304e-05	0.000220501	0.000826289	0.000630379	2.52222e-05	0.000822741	3.32059e-05	4.46459e-05	0.000275312		0.00183187	0.00231861	0.00205887	0.00235042	0.0016154	0.000424193	0.00398481	0.00014088	0.000112855	0.000856498
			41.5417	0.00357775	0.00442429	0.0105473	0.00749951	0.00215491	0.00425039	0.00367452	0.00763963	0.00670339	0.00471405		0.00743512	0.0075774	0.0104977	0.00631059	0.00447322	0.00418106	0.00502998	0.00719999	0.0054591	0.00846052			0.00487343	0.00334063	0.0019835	0.00382922	0.00533804	0.00574193	0.00869788	0.0048733	0.00600977	0.00524456		0.00620516	0.00459074	0.00486835	0.00507711	0.00563291	0.00422445	0.00846898	0.00757965	0.008421	0.00573771
			45.9833	0.00396244	0.00517987	0.0115144	0.00811733	0.00237819	0.00474531	0.00449616	0.00897715	0.00810925	0.00556159		0.00792129	0.00882444	0.0117155	0.00707608	0.00488597	0.00457224	0.00537584	0.00857902	0.0064481	0.0100166			0.00551479	0.00368972	0.00249171	0.00447105	0.00606679	0.00624268	0.00892333	0.00561769	0.00710216	0.00636085		0.0068369	0.00521629	0.00534031	0.00575018	0.00784501	0.00433327	0.0101376	0.00879314	0.00991306	0.00661913
			50.4247	0.00393588	0.00577927	0.0117441	0.00816068	0.00266916	0.00509196	0.00459497	0.00935784	0.00842529	0.00567955		0.00797253	0.00935373	0.0122576	0.00729732	0.00497925	0.00489696	0.00565201	0.00915997	0.00667679	0.00989557			0.00568888	0.00377049	0.00291521	0.00492088	0.00626296	0.00632183	0.0091647	0.00568826	0.00718669	0.00649056		0.0071372	0.00546934	0.00558538	0.0061572	0.00667825	0.00434288	0.0105517	0.00881952	0.00988592	0.00672044
			54.9453	0.000808898	0.00189349	0.00289498	0.00238184	-5.86444e-05	0.00183871	0.000448598	0.00171211	0.00199803	0.00132617		0.00161523	0.0027888	0.00366772	0.00141134	0.00212764	0.00172171	0.0026131	0.00214936	0.00205956	0.00312583			0.000658839	0.000958072	0.000641294	0.0006891	0.000883384	0.00201056	0.00246573	0.000880904	0.00129012	0.00145549		0.00158476	0.00186912	0.0026632	0.00429187	0.0017625	0.000345506	0.00413536	0.00154767	0.00342963	0.00198647
			59.3894	0.000651908	0.00127552	0.00236798	0.00194077	-0.000177949	0.00150701	0.00039363	0.00104172	0.000955086	0.00055128		0.00136304	0.00193337	0.00287223	0.00101367	0.00179032	0.00141887	0.00235563	0.00120301	0.00133993	0.00176196			0.000361485	0.000666445	0.000622897	0.000445399	0.000761513	0.00218466	0.00198162	0.000486866	0.00071004	0.000674638		0.001533	0.00134997	0.00216404	0.00206216	0.000843319	0.000324128	0.0033466	0.0010318	0.00173428	0.00129134
			63.8401	0.000593922	0.000606524	0.00228027	0.00190743	-0.000167818	0.00134987	0.000293639	0.000907157	0.000754596	0.000517942		0.00156459	0.00178119	0.00267546	0.00089004	0.0020695	0.00125862	0.00235357	0.00115566	0.00113189	0.00177922			0.000365139	0.000604471	0.000857435	0.000516679	0.000749096	0.0018706	0.00188837	0.000452748	0.000682491	0.000357424		0.00149758	0.00138233	0.00194248	0.00194779	0.000916881	0.000285625	0.0030843	0.00107334	0.0014515	0.00111093
	Complex Linked Resp. Avg/MTDR:			YMEY1	YMEY2	YMEY3	YMEY4	YMEY5	YMEY6	YMEY7	YMEY8	YMEY9	YMEY10														YFEY1	YFEY2	YFEY3	YFEY4	YFEY5	YFEY6	YFEY7	YFEY8	YFEY9	YFEY10
			CI	0.0014574	0.0013531	0.00396715	0.00342433	0.000638133	0.00229867	0.00129394	0.00334995	0.00157323	0.00117924													CI	0.00210022	0.00122798	0.00147897	0.00293161	0.00164146	0.00209811	0.00374495	0.00237089	0.00227569	0.00157883
			CII	0.00582168	0.00608858	0.00651177	0.00596004	0.00396187	0.00368424	0.00392735	0.00517665	0.00520448	0.00507657													CII	0.00634781	0.0041753	0.0045991	0.0046316	0.00124782	0.00401428	0.00866568	0.00486506	0.00436194	0.00376698
			CIV	0.00580083	0.0068565	0.0113795	0.00741025	0.00359012	0.00462299	0.00480391	0.0084856	0.00697032	0.00738798													CIV	0.00604273	0.0043462	0.00386408	0.00503427	0.00630399	0.00520117	0.00932403	0.00689526	0.00808643	0.00619554
	MTDR (Mito. Content, RFU)/well:			YMEY1	YMEY2	YMEY3	YMEY4	YMEY5	YMEY6	YMEY7	YMEY8	YMEY9	YMEY10														YFEY1	YFEY2	YFEY3	YFEY4	YFEY5	YFEY6	YFEY7	YFEY8	YFEY9	YFEY10
			predicted MTDR in seahorse well	4505.4	4426.2	4435.2	6098.2	5801.2	5762.4	5375.6	5779.4	9858.6	9835.6													predicted MTDR in seahorse well	5422.6	9195.8	6059.2	5821.4	4157	4357.6	4552.2	15140.8	12961.4	8922.8
[truncated: 74 more columns]

## Sheet: Young-Gastroc
SMAPLE INFORMATION:	All data from Seahorse Machine:		Time (minutes)	NADH-YMGT1			Succ/Rot-YMGT1			NADH-YMGT2			Succ/Rot-YMGT2			NADH-YMGT3			Succ/Rot-YMGT3			NADH-YMGT4			Succ/Rot-YMGT4			NADH-YMGT5			Succ/Rot-YMGT5			NADH-YMGT6			Succ/Rot-YMGT6			NADH-YMGT7			Succ/Rot-YMGT7			NADH-YMGT8			Succ/Rot-YMGT8
Tissue: Gastrocnemius muscle			1.30951	-3.54405	-7.23631	-9.73538	-17.0633	-9.58491	9.6961	-8.0268	-6.1831	-2.77204	-2.84415	-1.09987	-9.77337	-8.20659	8.48179	19.8564	-16.3854	6.20897	15.2592	-8.61571	-5.63939	-2.59978	-3.1833	2.24574	30.942	-8.35686	-12.8065	-17.117	5.50467	-4.64663	4.01581	-2.37485	8.47123	-9.66739	-4.85787	2.81341	44.0706	22.5792	3.05304	-8.16607	5.61428	1.82396	-5.46889	-8.38698	4.70237	-8.93212	13.6638
Tissue prep: Frozen			5.75478	1.06437	-8.15715	-7.87746	-11.6934	-4.16157	51.5916	-8.63292	-4.85897	-0.360249	-3.3945	10.1556	-5.25434	-10.0162	3.91079	14.6782	-8.99568	3.61851	6.30277	-9.69442	3.87383	3.47789	-3.88291	5.99133	29.1707	-1.39139	-10.201	-7.72359	10.5122	-2.82263	1.72366	-2.79306	13.4332	-1.58886	1.80563	2.93445	49.076	21.4655	-3.33908	-6.63042	2.35253	-2.56215	0.426495	-3.54958	-0.748443	-8.96717	9.01849
Entire region, bilateral			10.1948	5.7271	-1.2415	-6.65496	-9.33099	-1.19173	30.9724	-8.9031	-1.72453	2.51777	-2.09967	8.44392	-3.9594	-11.916	2.26809	15.9986	-6.96818	2.87018	5.58248	-10.8005	6.1601	13.6323	-5.87898	2.9424	27.4885	1.73495	-7.57203	-3.97562	13.3062	-4.52374	1.50187	-3.84139	18.2765	1.05647	4.04678	1.24735	61.5848	22.6416	-7.38897	-4.40798	11.5834	-2.22415	4.35321	0.777692	-0.308293	-9.57723	7.33618
2 mL 1X MAS used			14.725	19.2559	23.0232	5.70269	16.2883	37.6396	61.9127	-2.94157	4.54666	3.19041	16.5547	34.2144	30.5776	-5.70452	14.4769	16.9609	7.55447	35.9697	25.0336	2.83396	14.203	31.4137	13.3827	21.3268	41.9882	11.2754	3.16529	16.0265	30.9815	34.6107	22.2144	5.27347	19.7749	15.6946	32.0167	32.7975	64.5169	24.9035	0.045848	7.64274	34.8203	31.7569	34.46	7.90958	13.5095	3.29994	27.8906
7 ml homogenizer used			19.1682	14.5249	21.3958	2.82425	19.6092	38.3855	63.8154	-7.13875	-0.006229	0.237856	17.8819	32.6542	31.7504	-8.84846	11.7878	11.9872	14.8084	35.4465	26.3851	-1.3584	11.3685	30.2135	15.1847	24.2175	44.5018	8.09374	1.29106	21.853	31.6257	30.5574	25.1491	2.53243	15.0743	12.4087	32.1089	31.4197	64.73	21.4577	-5.08024	4.55855	31.1039	32.2409	32.9671	2.37569	9.60896	-1.40119	26.4603
Sex: male and female			23.6072	13.0418	17.1662	0.472586	19.1303	35.0089	56.1739	-8.62547	-0.222196	-0.144327	18.381	28.7702	31.2168	-10.572	10.5248	10.1183	14.6193	31.2873	23.7238	-2.70725	12.3403	28.3268	16.7487	25.1935	43.3678	6.46092	1.18327	23.2595	23.6174	26.4578	22.7479	3.18086	15.1016	12.583	31.5197	30.7129	66.4128	19.8265	-7.51471	2.87374	28.4285	29.6167	31.3588	3.79487	9.49892	-0.722989	23.4684
Strain: C57BL/6J			28.1345	-5.04907	-8.26042	-12.4644	-9.52285	-11.7161	7.48262	-18.1827	-14.686	-14.4519	6.12514	2.4656	0.07699	-15.7338	0.945056	5.6003	-14.7104	-3.96848	-9.71219	-19.2247	4.34394	7.80734	-9.29553	-6.26023	25.6021	-9.33808	-4.30072	0.826171	1.59261	6.02508	0.159998	-13.3017	7.2693	-15.5397	7.83789	-3.44728	41.112	5.62007	-19.071	-10.9922	-11.2387	-4.33477	-1.11587	-4.29621	-1.47129	-15.5018	-4.49424
Diet: Standard Chow			32.5764	-2.46038	-4.28443	-9.46066	-7.94547	-5.6146	6.9642	-16.1681	-13.5586	-12.9113	7.56698	10.1169	2.98944	-8.81581	3.59547	3.85008	-10.8557	0.741752	-8.13434	-17.2837	4.02004	10.0059	-7.66904	-3.58465	24.8549	-6.83805	0.080033	3.27406	3.39986	5.17257	3.30678	-7.16647	10.7369	-13.2203	12.4063	0.486999	39.8504	7.82035	-16.7643	-9.8356	-8.8035	7.21212	-1.21617	-1.44872	-0.105132	-11.5072	9.71014
Age: 10 weeks			37.0162	-2.82354	-4.66962	-7.17614	-6.85246	-4.06179	6.81787	-15.6228	-14.1647	-13.8365	9.09081	10.0904	1.42617	-5.66279	3.60184	2.69752	-8.14824	2.56007	-7.74376	-18.9694	9.05157	6.9404	-7.90504	-5.04185	24.3824	-4.64926	-1.55181	2.85558	2.97728	2.29331	2.79819	-5.08132	9.92246	-12.9158	17.8464	2.73168	39.9233	6.78125	-15.3831	-11.2218	-8.146	13.9471	-2.35075	-2.04055	-1.31348	-12.6121	3.76407
Protein used: 8-10 ug/well			41.5417	29.4441	12.435	15.7471	21.9104	22.4641	35.5398	6.50535	8.97811	9.50656	17.5639	24.1088	22.9052	6.27012	18.0625	15.5273	14.8367	25.0098	15.9554	3.85423	27.2105	27.4072	12.7411	20.6066	37.4161	20.5406	16.0352	30.9133	22.8836	26.1889	22.149	21.0602	29.1315	15.8246	27.3217	22.2665	59.1722	30.7763	10.5253	12.9921	26.9685	23.7084	28.1852	4.5604	10.3913	7.74391	30.381
			45.9833	21.6961	11.9569	14.3363	21.5258	22.4142	28.1555	7.27901	8.54324	8.78113	25.4471	22.6802	19.8097	-3.60668	17.0985	17.978	12.2224	23.5931	12.9453	3.9456	24.2641	26.9626	12.5176	19.564	34.8708	17.1106	16.4642	28.7109	26.1932	20.9881	21.3492	18.2085	26.816	13.3796	27.5451	20.3078	59.9012	24.9038	9.78277	9.74145	23.6058	21.307	23.3455	10.0156	8.2322	7.01761	27.0181
SHEET LEGEND:			50.4247	19.4927	12.2589	14.4296	19.8078	20.2572	26.885	8.68157	9.29631	10.3529	24.066	22.442	19.7421	-0.743905	15.8017	22.1475	11.0536	19.7297	16.3187	4.03411	22.4132	26.3569	12.2383	20.057	32.2595	18.5267	16.3057	26.5746	20.8182	18.0623	22.7892	17.7407	25.919	13.23	25.0677	19.027	58.4136	23.7791	10.7664	16.6709	16.6205	20.4543	20.021	11.7214	8.7106	6.07161	24.9883
YM = Young Male			54.9453	-0.880226	-14.2622	-11.4163	-6.89778	-2.34284	2.0603	-0.504904	-1.55381	-9.28046	-5.81985	-8.19085	-2.9132	-12.5107	8.80411	12.5004	-9.4632	-1.66302	-4.01272	-10.9256	5.10709	4.01872	-9.37277	-2.4643	19.3689	3.89476	-7.97325	-0.724561	4.30919	-0.486365	-0.766687	0.388392	3.9082	-8.44089	9.51905	0.231361	32.6872	1.34845	-11.9806	-4.45964	-3.01768	1.5844	1.08137	-2.99018	-7.0463	-4.57809	12.3886
YF = Young Female			59.3894	1.11484	-13.6694	-10.4295	-3.33953	-1.86275	2.85422	5.6614	0.523227	-8.98969	-1.26676	-7.18923	0.026787	-17.8393	6.35265	15.3873	-9.63478	-0.263272	-6.50973	-9.52514	4.15182	5.97609	-8.27105	-2.11803	18.3321	10.0735	-6.76912	2.09787	2.72238	4.35009	0.319829	-0.965991	3.83	-8.9085	9.3078	0.527251	32.7945	2.35596	-9.67893	-1.26435	-4.33671	0.235274	-3.22551	-2.20746	-7.40031	-3.60217	6.57148
OM = Old Male			63.8401	2.56966	-14.8013	-10.3211	-9.26731	-2.58268	2.50387	-5.99157	4.04192	-9.77759	-1.15681	-7.85782	1.01354	-17.8016	7.59435	16.7851	-10.3112	-0.99907	-6.6176	-8.42	3.77601	6.26928	-6.76803	-0.739048	17.3245	4.11846	-7.90828	1.37799	2.75845	8.50722	1.38381	-0.478514	3.76444	-9.98275	10.0437	1.65718	31.7526	3.45541	-6.99653	-1.71042	-8.20148	1.96741	-2.09135	1.18822	-8.26177	-1.56954	4.95007
OF = Old Female
GT = Gastrocnemius muscle	Biological Sample Average:		Time (minutes)	NADH-YMGT1	NADH-YMGT2	NADH-YMGT3	NADH-YMGT4	NADH-YMGT5	NADH-YMGT6	NADH-YMGT7	NADH-YMGT8	NADH-YMGT9	NADH-YMGT10		Succ/Rot-YMGT1	Succ/Rot-YMGT2	Succ/Rot-YMGT3	Succ/Rot-YMGT4	Succ/Rot-YMGT5	Succ/Rot-YMGT6	Succ/Rot-YMGT7	Succ/Rot-YMGT8	Succ/Rot-YMGT9	Succ/Rot-YMGT10			NADH-YFGT1	NADH-YFGT2	NADH-YFGT3	NADH-YFGT4	NADH-YFGT5	NADH-YFGT6	NADH-YFGT7	NADH-YFGT8	NADH-YFGT9	NADH-YFGT10		Succ/Rot-YFGT1	Succ/Rot-YFGT2	Succ/Rot-YFGT3	Succ/Rot-YFGT4	Succ/Rot-YFGT5	Succ/Rot-YFGT6	Succ/Rot-YFGT7	Succ/Rot-YFGT8	Succ/Rot-YFGT9	Succ/Rot-YFGT10
1, 2, 3…10 = sample number	(the average of three technical replicates per biological sample)		1.30951	-6.83858	-5.66064	6.71055	-5.61829	-12.7601	-1.19034	5.82206	-4.20558	3.84137	9.83144		-5.6507	-4.57246	1.69426	10.0015	1.62462	14.0087	0.656449	9.04277	13.2973	8.48341			-6.23984	-9.26415	-5.20345	-0.730363	1.56099	-2.82542	11.6722	5.65486	6.91805	5.2616		-7.49256	37.3734	8.4762	3.02742	-4.37055	6.51146	5.01743	-3.73258	4.81382	2.8797
MTDR = mitoTracker Deep Red			5.75478	-4.99008	-4.61738	2.8576	-0.780902	-6.43866	3.01708	3.83199	-4.42173	2.72249	5.23221		11.9122	0.502237	0.308532	10.4264	3.13774	17.9387	0.0722917	10.6307	9.4445	14.1317			-5.89074	-7.14985	-7.97775	-0.622829	16.4594	-5.34168	15.5695	6.78299	8.73161	8.63234		-4.40055	33.5398	2.42531	0.267095	-3.4464	3.92519	2.5332	0.19199	4.17863	4.03247
			10.1948	-0.723118	-2.70329	2.11689	2.99732	-3.2709	5.16386	3.61487	-3.03594	3.10216	11.7983		6.81656	0.794948	0.49483	8.18398	3.42812	22.293	4.57081	5.00164	12.7986	14.769			-5.72586	-1.47288	-2.25797	0.423374	21.6448	-4.40597	20.2339	5.59819	5.91733	6.79546		-1.18921	23.3915	3.27176	1.24065	-1.17088	1.16417	1.9288	0.313084	4.77284	3.29862
			14.725	15.9939	1.5985	8.57774	16.1502	10.1558	13.581	10.864	8.23968	17.4189	20.5527		38.6135	27.1156	22.8526	25.5659	29.2689	43.1103	33.6791	42.3701	34.3149	26.8081			2.55119	5.68861	6.75906	9.89992	23.1117	8.88151	35.9597	22.6682	27.1947	21.453		24.1337	38.1084	29.1156	20.1042	30.5076	31.3696	26.7539	17.7942	40.7833	48.5107
			19.1682	12.915	-2.30238	4.97553	13.4079	10.4126	10.0051	6.97867	3.52782	15.979	17.7867		40.6034	27.4288	25.5467	27.968	29.1107	42.7529	32.104	37.5605	31.7545	26.4175			0.0298773	-1.46812	3.80778	5.27358	17.9229	5.73304	25.874	25.522	26.3615	20.9428		24.8136	32.53	25.6391	20.9673	28.5576	23.551	25.4802	20.1935	41.98	49.3553
			23.6072	10.2269	-2.99733	3.35702	12.6533	10.3012	10.2885	5.06186	4.19026	14.9654	14.5558		36.771	26.1227	23.2101	28.4367	24.2744	42.8818	29.8013	31.4553	28.9521	23.5738			0.256876	-0.403831	3.21347	5.10642	16.2802	3.94634	25.4502	25.1223	24.4886	19.8538		22.7222	31.8212	26.8642	18.9788	24.7772	19.6101	22.7868	19.2869	38.4062	45.1563
			28.1345	-8.59129	-15.7735	-3.06281	-2.35781	-4.27088	-7.19069	-8.1477	-7.08977	3.00908	1.33725		-4.58544	2.88924	-9.46369	3.34879	2.59256	15.1675	-5.56313	1.55823	2.12416	2.26399			-2.89683	-9.55186	-8.72035	-4.9383	4.92623	-6.11644	4.44912	0.409841	-3.11507	0.512505		8.60755	11.1848	6.23791	-2.97163	0.472527	1.81281	5.5555	1.33671	-2.09545	-6.56918
			32.5764	-5.40182	-14.2127	-0.456757	-1.08591	-1.16132	-3.21663	-6.25985	-4.35367	1.69702	0.719091		-2.19862	6.89112	-6.08275	4.53375	3.95973	17.5812	-0.93585	9.01604	1.11514	3.84334			-0.697733	-2.34858	-4.55741	-3.91641	5.55088	-2.63749	7.95134	-8.12618	-1.33254	-0.824897		5.69377	14.3653	5.05365	0.320108	1.5833	2.72041	8.80806	-0.648522	-1.271	-6.08575
			37.0162	-4.88977	-14.5413	0.212187	-0.992484	-1.11516	-2.69154	-6.60789	-5.32204	-0.125786	2.17271		-1.36546	6.86912	-4.44398	3.81185	2.68959	20.1671	1.15011	6.19315	5.21722	2.72694			-0.688423	-0.799952	-3.57459	-6.08462	3.98319	-2.27519	5.99018	-5.6538	-0.294125	-1.07975		4.02023	10.6988	5.90838	1.87583	2.73141	2.16865	5.68034	-2.92301	-0.0409573	-4.58394
			41.5417	19.2087	8.33001	13.2866	19.4907	22.4963	22.0054	18.0979	7.56521	15.8702	6.79279		26.6381	21.526	18.6007	23.5879	23.7405	36.2535	26.2874	25.4591	21.7585	15.1662			8.29406	9.87342	19.3199	10.9212	29.3327	13.6993	25.8628	20.2478	16.0056	21.9402		15.9224	25.6139	27.0117	16.0276	19.9349	18.8319	20.7306	21.7324	20.992	24.7957
			45.9833	15.9964	8.20112	10.4899	18.3908	20.7619	19.468	14.8093	8.42182	17.769	9.66907		24.0318	22.6457	16.2536	22.3175	22.8435	35.918	22.7528	24.9906	15.5326	17.2609			7.7743	9.72183	14.5981	9.49086	26.9608	12.5446	23.1974	20.2772	15.9143	22.4686		13.8281	22.2793	23.7361	14.6108	18.394	15.6937	20.7113	22.9482	20.5689	24.3162
			50.4247	15.3937	9.44358	12.4018	17.6014	20.469	18.9632	17.0722	8.83453	17.8534	10.4346		22.3167	22.0834	15.7007	21.5183	20.5566	34.1694	19.0319	23.0386	16.9855	16.0353			7.73261	8.73847	14.4124	8.43148	25.5078	14.2066	23.0957	20.0661	15.9314	22.5052		13.8653	21.5904	28.0171	14.0126	21.3423	14.7197	17.2049	30.5364	18.2244	22.5868
			54.9453	-8.85292	-3.77973	2.93128	-0.599942	-1.60102	-1.38144	-5.03061	-4.87152	0.0426757	-3.23928		-2.39344	-5.6413	-5.04632	2.51061	1.01871	14.1459	-0.117301	8.81361	1.428	0.689683			0.367125	-2.34157	-3.34978	-11.0749	10.0745	-0.0600343	8.52335	4.38767	5.72848	-2.07354		-1.59114	9.82865	9.15478	-1.33621	1.51694	3.48127	3.29541	6.77062	-3.842	-4.86285
			59.3894	-7.66137	-0.935021	1.30025	0.200924	1.80075	-2.01483	-2.86244	-4.40332	0.934503	-3.58346		-0.782687	-2.80974	-5.46926	2.64768	2.4641	14.2098	-2.44232	6.22677	0.689979	0.682212			-0.601023	-1.88971	-3.79765	-11.5641	10.1173	-0.0981483	7.06865	4.11669	-0.838731	-4.66394		2.22485	10.2075	11.617	-2.19783	2.82997	2.2004	5.47667	0.262902	-1.68318	-3.93789
			63.8401	-7.51757	-3.90908	2.19262	0.541765	-0.803943	-2.23228	-1.75051	-2.88103	0.669145	-2.78765		-3.11537	-2.66703	-5.97596	3.27248	4.21649	14.4845	-2.77514	7.37474	0.547161	-0.349402			-0.29056	-1.26737	-4.09109	-12.0798	8.94585	-0.731032	7.23259	1.44458	-0.860643	-4.55625		0.641128	10.0167	15.1475	-3.04966	2.60074	2.37874	6.64659	1.31051	-2.12644	-4.05085
	Complex Linked Resp. Averages:			YMGT1	YMGT2	YMGT3	YMGT4	YMGT5	YMGT6	YMGT7	YMGT8	YMGT9	YMGT10														YFGT1	YFGT2	YFGT3	YFGT4	YFGT5	YFGT6	YFGT7	YFGT8	YFGT9	YFGT10
	(average of three consectutive time points)		CI	13.0453	-1.23374	5.63676	14.0705	10.2899	11.2915	7.63485	5.31925	16.1211	17.6317													CI	0.94598	1.27222	4.59344	6.75997	19.1049	6.18696	29.0946	24.4375	26.0149	20.7499
			CII	38.6626	26.889	23.8698	27.3235	27.5513	42.915	31.8615	37.1287	31.6739	25.5998													CII	23.8898	34.1532	27.2063	20.0167	27.9475	24.8435	25.007	19.0915	40.3898	47.6741
			CIV	20.5976	15.3716	14.4556	20.4844	21.8113	27.7963	19.6752	16.385	17.6282	12.5598													CIV	11.2361	16.3029	21.1825	12.2491	23.5788	14.9493	21.8004	22.6347	17.9394	23.1021
	Biological Sample Avg/ug pro:		Time (minutes)	NADH-YMGT1	NADH-YMGT2	NADH-YMGT3	NADH-YMGT4	NADH-YMGT5	NADH-YMGT6	NADH-YMGT7	NADH-YMGT8	NADH-YMGT9	NADH-YMGT10		Succ/Rot-YMGT1	Succ/Rot-YMGT2	Succ/Rot-YMGT3	Succ/Rot-YMGT4	Succ/Rot-YMGT5	Succ/Rot-YMGT6	Succ/Rot-YMGT7	Succ/Rot-YMGT8	Succ/Rot-YMGT9	Succ/Rot-YMGT10			NADH-YFGT1	NADH-YFGT2	NADH-YFGT3	NADH-YFGT4	NADH-YFGT5	NADH-YFGT6	NADH-YFGT7	NADH-YFGT8	NADH-YFGT9	NADH-YFGT10		Succ/Rot-YFGT1	Succ/Rot-YFGT2	Succ/Rot-YFGT3	Succ/Rot-YFGT4	Succ/Rot-YFGT5	Succ/Rot-YFGT6	Succ/Rot-YFGT7	Succ/Rot-YFGT8	Succ/Rot-YFGT9	Succ/Rot-YFGT10
			1.30951	-0.683858	-0.566064	0.671055	-0.561829	-1.27601	-0.119034	0.582206	-0.420558	0.480171	1.22893		-0.56507	-0.457246	0.169426	1.00015	0.162462	1.40087	0.0656449	0.904277	1.66217	1.06043			-0.623984	-0.926415	-0.520345	-0.0730363	0.156099	-0.282542	1.16722	0.706857	0.864757	0.6577		-0.749256	3.73734	0.84762	0.302742	-0.437055	0.651146	0.501743	-0.466572	0.601728	0.359962
			5.75478	-0.499008	-0.461738	0.28576	-0.0780902	-0.643866	0.301708	0.383199	-0.442173	0.340312	0.654027		1.19122	0.0502237	0.0308532	1.04264	0.313774	1.79387	0.00722917	1.06307	1.18056	1.76646			-0.589074	-0.714985	-0.797775	-0.0622829	1.64594	-0.534168	1.55695	0.847874	1.09145	1.07904		-0.440055	3.35398	0.242531	0.0267095	-0.34464	0.392519	0.25332	0.0239987	0.522329	0.504058
			10.1948	-0.0723118	-0.270329	0.211689	0.299732	-0.32709	0.516386	0.361487	-0.303594	0.38777	1.47479		0.681656	0.0794948	0.049483	0.818398	0.342812	2.2293	0.457081	0.500165	1.59983	1.84613			-0.572586	-0.147288	-0.225797	0.0423374	2.16448	-0.440597	2.02339	0.699774	0.739667	0.849433		-0.118921	2.33915	0.327176	0.124065	-0.117088	0.116417	0.19288	0.0391355	0.596605	0.412327
			14.725	1.59939	0.15985	0.857774	1.61502	1.01558	1.3581	1.0864	0.823968	2.17736	2.56908		3.86135	2.71156	2.28526	2.55659	2.92689	4.31103	3.36791	4.23701	4.28937	3.35101			0.255119	0.568861	0.675906	0.989992	2.31117	0.888151	3.59597	2.83352	3.39934	2.68163		2.41337	3.81084	2.91156	2.01042	3.05076	3.13696	2.67539	2.22427	5.09792	6.06383
			19.1682	1.2915	-0.230238	0.497553	1.34079	1.04126	1.00051	0.697867	0.352782	1.99738	2.22334		4.06034	2.74288	2.55467	2.7968	2.91107	4.27529	3.2104	3.75605	3.96932	3.30218			0.00298773	-0.146812	0.380778	0.527358	1.79229	0.573304	2.5874	3.19025	3.29518	2.61785		2.48136	3.253	2.56391	2.09673	2.85576	2.3551	2.54802	2.52418	5.2475	6.16941
			23.6072	1.02269	-0.299733	0.335702	1.26533	1.03012	1.02885	0.506186	0.419026	1.87067	1.81948		3.6771	2.61227	2.32101	2.84367	2.42744	4.28818	2.98013	3.14553	3.61901	2.94672			0.0256876	-0.0403831	0.321347	0.510642	1.62802	0.394634	2.54502	3.14029	3.06108	2.48173		2.27222	3.18212	2.68642	1.89788	2.47772	1.96101	2.27868	2.41086	4.80078	5.64453
			28.1345	-0.859129	-1.57735	-0.306281	-0.235781	-0.427088	-0.719069	-0.81477	-0.708977	0.376135	0.167157		-0.458544	0.288924	-0.946369	0.334879	0.259256	1.51675	-0.556313	0.155823	0.26552	0.282998			-0.289683	-0.955186	-0.872035	-0.49383	0.492623	-0.611644	0.444912	0.0512301	-0.389384	0.0640631		0.860755	1.11848	0.623791	-0.297163	0.0472527	0.181281	0.55555	0.167089	-0.261931	-0.821148
			32.5764	-0.540182	-1.42127	-0.0456757	-0.108591	-0.116132	-0.321663	-0.625985	-0.435367	0.212128	0.0898864		-0.219862	0.689112	-0.608275	0.453375	0.395973	1.75812	-0.093585	0.901604	0.139393	0.480418			-0.0697733	-0.234858	-0.455741	-0.391641	0.555088	-0.263749	0.795134	-1.01577	-0.166568	-0.103112		0.569377	1.43653	0.505365	0.0320108	0.15833	0.272041	0.880806	-0.0810653	-0.158875	-0.760719
			37.0162	-0.488977	-1.45413	0.0212187	-0.0992484	-0.111516	-0.269154	-0.660789	-0.532204	-0.0157233	0.271588		-0.136546	0.686912	-0.444398	0.381185	0.268959	2.01671	0.115011	0.619315	0.652153	0.340867			-0.0688423	-0.0799952	-0.357459	-0.608462	0.398319	-0.227519	0.599018	-0.706725	-0.0367656	-0.134968		0.402023	1.06988	0.590838	0.187583	0.273141	0.216865	0.568034	-0.365376	-0.00511967	-0.572993
			41.5417	1.92087	0.833001	1.32866	1.94907	2.24963	2.20054	1.80979	0.756521	1.98378	0.849099		2.66381	2.1526	1.86007	2.35879	2.37405	3.62535	2.62874	2.54591	2.71981	1.89578			0.829406	0.987342	1.93199	1.09212	2.93327	1.36993	2.58628	2.53097	2.0007	2.74252		1.59224	2.56139	2.70117	1.60276	1.99349	1.88319	2.07306	2.71654	2.624	3.09947
			45.9833	1.59964	0.820112	1.04899	1.83908	2.07619	1.9468	1.48093	0.842182	2.22112	1.20863		2.40318	2.26457	1.62536	2.23175	2.28435	3.5918	2.27528	2.49906	1.94158	2.15762			0.77743	0.972183	1.45981	0.949086	2.69608	1.25446	2.31974	2.53464	1.98928	2.80858		1.38281	2.22793	2.37361	1.46108	1.8394	1.56937	2.07113	2.86853	2.57111	3.03953
			50.4247	1.53937	0.944358	1.24018	1.76014	2.0469	1.89632	1.70722	0.883453	2.23168	1.30432		2.23167	2.20834	1.57007	2.15183	2.05566	3.41694	1.90319	2.30386	2.12319	2.00441			0.773261	0.873847	1.44124	0.843148	2.55078	1.42066	2.30957	2.50827	1.99143	2.81315		1.38653	2.15904	2.80171	1.40126	2.13423	1.47197	1.72049	3.81705	2.27805	2.82335
			54.9453	-0.885292	-0.377973	0.293128	-0.0599942	-0.160102	-0.138144	-0.503061	-0.487152	0.00533446	-0.404911		-0.239344	-0.56413	-0.504632	0.251061	0.101871	1.41459	-0.0117301	0.881361	0.1785	0.0862104			0.0367125	-0.234157	-0.334978	-1.10749	1.00745	-0.00600343	0.852335	0.548459	0.71606	-0.259192		-0.159114	0.982865	0.915478	-0.133621	0.151694	0.348127	0.329541	0.846327	-0.48025	-0.607856
			59.3894	-0.766137	-0.0935021	0.130025	0.0200924	0.180075	-0.201483	-0.286244	-0.440332	0.116813	-0.447933		-0.0782687	-0.280974	-0.546926	0.264768	0.24641	1.42098	-0.244232	0.622677	0.0862474	0.0852765			-0.0601023	-0.188971	-0.379765	-1.15641	1.01173	-0.00981483	0.706865	0.514586	-0.104841	-0.582993		0.222485	1.02075	1.1617	-0.219783	0.282997	0.22004	0.547667	0.0328627	-0.210397	-0.492237
			63.8401	-0.751757	-0.390908	0.219262	0.0541765	-0.0803943	-0.223228	-0.175051	-0.288103	0.0836432	-0.348456		-0.311537	-0.266703	-0.597596	0.327248	0.421649	1.44845	-0.277514	0.737474	0.0683951	-0.0436752			-0.029056	-0.126737	-0.409109	-1.20798	0.894585	-0.0731032	0.723259	0.180572	-0.10758	-0.569531		0.0641128	1.00167	1.51475	-0.304966	0.260074	0.237874	0.664659	0.163813	-0.265805	-0.506356
	Complex Linked Resp. Avg/ug pro:			YMGT1	YMGT2	YMGT3	YMGT4	YMGT5	YMGT6	YMGT7	YMGT8	YMGT9	YMGT10														YFGT1	YFGT2	YFGT3	YFGT4	YFGT5	YFGT6	YFGT7	YFGT8	YFGT9	YFGT10
			CI	1.30453	-0.123374	0.563676	1.40705	1.02899	1.12915	0.763485	0.531925	2.01514	2.20397													CI	0.094598	0.127222	0.459344	0.675997	1.91049	0.618696	2.90946	3.05469	3.25187	2.59374
			CII	3.86626	2.6889	2.38698	2.73235	2.75513	4.2915	3.18615	3.71287	3.95923	3.19997													CII	2.38898	3.41532	2.72063	2.00167	2.79475	2.48435	2.5007	2.38644	5.04873	5.95926
			CIV	2.05976	1.53716	1.44556	2.04844	2.18113	2.77963	1.96752	1.6385	2.20353	1.56998													CIV	1.12361	1.63029	2.11825	1.22491	2.35788	1.49493	2.18004	2.82933	2.24243	2.88777
	Biological Sample Avg/MTDR:		Time (minutes)	NADH-YMGT1	NADH-YMGT2	NADH-YMGT3	NADH-YMGT4	NADH-YMGT5	NADH-YMGT6	NADH-YMGT7	NADH-YMGT8	NADH-YMGT9	NADH-YMGT10		Succ/Rot-YMGT1	Succ/Rot-YMGT2	Succ/Rot-YMGT3	Succ/Rot-YMGT4	Succ/Rot-YMGT5	Succ/Rot-YMGT6	Succ/Rot-YMGT7	Succ/Rot-YMGT8	Succ/Rot-YMGT9	Succ/Rot-YMGT10			NADH-YFGT1	NADH-YFGT2	NADH-YFGT3	NADH-YFGT4	NADH-YFGT5	NADH-YFGT6	NADH-YFGT7	NADH-YFGT8	NADH-YFGT9	NADH-YFGT10		Succ/Rot-YFGT1	Succ/Rot-YFGT2	Succ/Rot-YFGT3	Succ/Rot-YFGT4	Succ/Rot-YFGT5	Succ/Rot-YFGT6	Succ/Rot-YFGT7	Succ/Rot-YFGT8	Succ/Rot-YFGT9	Succ/Rot-YFGT10
			1.30951	-0.000682186	-0.000589337	0.000700877	-0.000758808	-0.00143629	-0.000147954	0.000650676	-0.000699868	0.000484648	0.00133854		-0.000563689	-0.000476045	0.000176956	0.0013508	0.000182868	0.00174123	7.33651e-05	0.00150485	0.00167766	0.00115501			-0.000862035	-0.00111018	-0.000447589	-7.20997e-05	0.000122915	-0.00028331	0.00103555	0.000545141	0.000641095	0.000392463		-0.0010351	0.0044787	0.000729104	0.000298859	-0.000344146	0.000652916	0.000445143	-0.000359829	0.000446096	0.000214797
			5.75478	-0.000497788	-0.000480722	0.000298459	-0.000105469	-0.00072474	0.000375012	0.000428266	-0.000735839	0.000343485	0.00071236		0.00118831	5.22886e-05	3.22244e-05	0.00140819	0.000353186	0.00222971	8.07936e-06	0.00176911	0.00119157	0.00192401			-0.000813806	-0.000856813	-0.000686228	-6.14842e-05	0.00129605	-0.00053562	0.00138131	0.000653896	0.000809157	0.000643888		-0.000607936	0.00401929	0.00020862	2.6367e-05	-0.000271376	0.000393585	0.000224744	1.85082e-05	0.000387233	0.000300782
			10.1948	-7.21351e-05	-0.000281443	0.000221096	0.000404819	-0.000368175	0.000641848	0.000404	-0.000505224	0.000391386	0.00160633		0.00067999	8.27631e-05	5.16821e-05	0.00110533	0.000385871	0.00277093	0.000510836	0.000832345	0.00161474	0.00201079			-0.000791029	-0.000176505	-0.000194226	4.17945e-05	0.00170435	-0.000441795	0.00179514	0.000539678	0.000548358	0.000506875		-0.000164289	0.00280316	0.00028143	0.000122474	-9.21972e-05	0.000116734	0.000171122	3.0182e-05	0.000442298	0.000246044
			14.725	0.00159548	0.000166422	0.000895894	0.00218125	0.00114314	0.00168807	0.00121417	0.0013712	0.00219766	0.00279822		0.00385191	0.00282304	0.00238682	0.00345294	0.00329452	0.00535845	0.00376399	0.00705099	0.00432936	0.00364989			0.000352447	0.000681704	0.0005814	0.000977297	0.00181986	0.000890564	0.00319032	0.00218526	0.00252013	0.00160018		0.00333407	0.00456678	0.00250446	0.00198464	0.00240223	0.00314548	0.00237359	0.0017154	0.00377938	0.00361842
			19.1682	0.00128834	-0.000239703	0.000519665	0.00181087	0.00117205	0.0012436	0.00077994	0.00058708	0.002016	0.00242165		0.00405041	0.00285565	0.0026682	0.00377737	0.00327672	0.00531402	0.00358796	0.00625061	0.00400633	0.00359671			4.12756e-06	-0.000175935	0.000327537	0.000520595	0.00141128	0.000574862	0.00229552	0.00246038	0.00244291	0.00156213		0.003428	0.00389828	0.00220542	0.00206984	0.00224869	0.0023615	0.00226059	0.0019467	0.00389028	0.00368142
			23.6072	0.00102019	-0.000312056	0.000350621	0.00170896	0.00115951	0.00127882	0.000565716	0.00069732	0.00188811	0.00198176		0.00366812	0.00271967	0.00242416	0.00384067	0.00273234	0.00533004	0.00333061	0.00523462	0.00365275	0.00320955			3.54874e-05	-4.83937e-05	0.000276416	0.000504093	0.00128194	0.000395706	0.00225792	0.00242185	0.00226935	0.0014809		0.00313907	0.00381334	0.0023108	0.00187354	0.00195101	0.00196633	0.00202163	0.0018593	0.0035591	0.00336821
			28.1345	-0.000857029	-0.0016422	-0.000319893	-0.000318447	-0.000480733	-0.000893776	-0.000910591	-0.00117984	0.000379642	0.000182066		-0.000457423	0.000300803	-0.000988427	0.000452288	0.000291821	0.00188527	-0.000621738	0.000259312	0.000267996	0.000308239			-0.000400198	-0.00114466	-0.000750106	-0.000487497	0.000387902	-0.000613306	0.000394723	3.95096e-05	-0.000288673	3.82278e-05		0.00118913	0.00134035	0.000536571	-0.000293352	3.72077e-05	0.000181774	0.000492881	0.000128862	-0.000194185	-0.000489996
			32.5764	-0.000538862	-0.0014797	-4.77055e-05	-0.000146663	-0.000130719	-0.000399815	-0.000699604	-0.000724513	0.000214105	9.79034e-05		-0.000219325	0.000717444	-0.000635307	0.000612329	0.00044571	0.00218528	-0.000104591	0.0015004	0.000140693	0.000523267			-9.6392e-05	-0.000281446	-0.000392018	-0.000386619	0.000437088	-0.000264466	0.000705438	-0.000783382	-0.000123487	-6.15292e-05		0.000786595	0.00172149	0.000434704	3.16003e-05	0.000124672	0.00027278	0.000781445	-6.2519e-05	-0.000117783	-0.000453937
			37.0162	-0.000487782	-0.00151392	2.21616e-05	-0.000134045	-0.000125523	-0.000334548	-0.000738501	-0.000885664	-1.58699e-05	0.000295812		-0.000136212	0.000715153	-0.000464147	0.00051483	0.000302742	0.0025067	0.000128537	0.00103063	0.000658233	0.00037127			-9.51058e-05	-9.58634e-05	-0.000307478	-0.00060066	0.000313644	-0.000228137	0.000531445	-0.000545039	-2.72565e-05	-8.05383e-05		0.000555396	0.00128211	0.000508226	0.000185177	0.000215076	0.000217454	0.000503956	-0.000281784	-3.79551e-06	-0.000341917
			41.5417	0.00191618	0.000867249	0.00138771	0.00263241	0.0025322	0.00273519	0.00202263	0.00125896	0.00200227	0.000924831		0.0026573	0.0022411	0.00194273	0.00318579	0.00267224	0.00450617	0.00293789	0.00423675	0.00274517	0.00206487			0.00114583	0.0011832	0.00166185	0.00107812	0.00230972	0.00137365	0.00229453	0.00195193	0.00148324	0.00163652		0.00219968	0.00306948	0.00232349	0.00158221	0.00156971	0.00188831	0.0018392	0.00209505	0.00194533	0.00184952
			45.9833	0.00159573	0.00085383	0.00109561	0.00248386	0.00233697	0.0024198	0.0016551	0.00140151	0.00224183	0.00131643		0.00239731	0.00235767	0.00169759	0.0030142	0.00257128	0.00446447	0.00254286	0.00415879	0.00195968	0.00235006			0.00107402	0.00116503	0.0012557	0.000936916	0.00212295	0.00125787	0.00205806	0.00195476	0.00147477	0.00167594		0.00191035	0.00266988	0.00204172	0.00144235	0.00144838	0.00157364	0.00183749	0.00221226	0.00190612	0.00181375
			50.4247	0.00153561	0.000983184	0.00129529	0.00237725	0.002304	0.00235706	0.001908	0.00147019	0.00225248	0.00142066		0.00222621	0.00229913	0.00163984	0.00290626	0.00231386	0.00424713	0.00212702	0.00383395	0.00214298	0.00218319			0.00106826	0.00104719	0.00123972	0.000832336	0.00200854	0.00142452	0.00204904	0.00193442	0.00147636	0.00167867		0.00191549	0.00258732	0.00240997	0.00138329	0.00168054	0.00147597	0.00152641	0.00294378	0.00168885	0.00168475
			54.9453	-0.000883128	-0.000393513	0.000306155	-8.10283e-05	-0.000180211	-0.000171707	-0.000562224	-0.000810691	5.38419e-06	-0.000441025		-0.000238759	-0.000587324	-0.000527058	0.000339083	0.000114667	0.00175828	-1.31097e-05	0.00146671	0.000180164	9.38996e-05			5.07183e-05	-0.000280605	-0.000288141	-0.00109329	0.00079329	-6.01975e-06	0.000756186	0.000422982	0.000530857	-0.000154665		-0.000219816	0.00117783	0.000787474	-0.000131907	0.000119447	0.000349073	0.000292367	0.000652703	-0.000356038	-0.00036272
			59.3894	-0.000764265	-9.73463e-05	0.000135803	2.71368e-05	0.000202693	-0.000250436	-0.000319908	-0.000732775	0.000117902	-0.000487885		-7.80774e-05	-0.000292525	-0.000571232	0.000357596	0.00027736	0.00176623	-0.000272955	0.00103622	8.70515e-05	9.28824e-05			-8.30314e-05	-0.000226456	-0.000326665	-0.00114159	0.000796657	-9.8415e-06	0.000627126	0.000396858	-7.7725e-05	-0.000347884		0.000307364	0.00122323	0.000999266	-0.000216964	0.000222838	0.000220638	0.000485886	2.53443e-05	-0.00015598	-0.000293728
			63.8401	-0.00074992	-0.00040698	0.000229006	7.31709e-05	-9.04924e-05	-0.000277463	-0.000195638	-0.000479445	8.4423e-05	-0.000379535		-0.000310776	-0.000277668	-0.000624153	0.000441982	0.000474611	0.00180037	-0.000310152	0.00122726	6.90328e-05	-4.75706e-05			-4.0141e-05	-0.000151877	-0.000351907	-0.00119249	0.000704414	-7.33018e-05	0.000641671	0.00013926	-7.97556e-05	-0.000339851		8.85719e-05	0.00120037	0.00130295	-0.000301055	0.000204788	0.000238521	0.000589681	0.000126336	-0.000197057	-0.000302153
	Complex Linked Resp. Avg/MTDR:			YMGT1	YMGT2	YMGT3	YMGT4	YMGT5	YMGT6	YMGT7	YMGT8	YMGT9	YMGT10														YFGT1	YFGT2	YFGT3	YFGT4	YFGT5	YFGT6	YFGT7	YFGT8	YFGT9	YFGT10
			CI	0.00130134	-0.000128446	0.000588727	0.00190036	0.00115823	0.00140349	0.000853275	0.0008852	0.00203392	0.00240054													CI	0.000130687	0.000152458	0.000395117	0.000667329	0.00150436	0.000620377	0.00258126	0.00235583	0.0024108	0.00154774
			CII	0.00385681	0.00279945	0.00249306	0.00369032	0.0031012	0.00533417	0.00356085	0.00617874	0.00399615	0.00348538													CII	0.00330038	0.0040928	0.00234023	0.001976	0.00220064	0.00249111	0.0022186	0.00184047	0.00374292	0.00355602
			CIV	0.00205472	0.00160036	0.0015098	0.00276663	0.00245509	0.00345497	0.00219892	0.00272669	0.00222407	0.00171001													CIV	0.00155227	0.00195368	0.00182208	0.0012092	0.00185664	0.00149899	0.00193412	0.00218203	0.00166244	0.00172319
	MTDR (Mito. Content, RFU)/well:			YMGT1	YMGT2	YMGT3	YMGT4	YMGT5	YMGT6	YMGT7	YMGT8	YMGT9	YMGT10														YFGT1	YFGT2	YFGT3	YFGT4	YFGT5	YFGT6	YFGT7	YFGT8	YFGT9	YFGT10
			predicted MTDR in seahorse well	10024.5	9605.1	9574.5	7404.1	8884.1	8045.3	8947.7	6009.1	7926.1	7344.9													predicted MTDR in seahorse well	7238.5	8344.7	11625.5	10129.9	12699.7	9972.9	11271.5	10373.2	10791	13406.6
[truncated: 74 more columns]

## Sheet: Young-gWAT
SMAPLE INFORMATION:	All data from Seahorse Machine:		Time (minutes)	NADH-YMGW1			Succ/Rot-YMGW1			NADH-YMGW2			Succ/Rot-YMGW2			NADH-YMGW3			Succ/Rot-YMGW3			NADH-YMGW4			Succ/Rot-YMGW4			NADH-YMGW5			Succ/Rot-YMGW5			NADH-YMGW6			Succ/Rot-YMGW6			NADH-YMGW7			Succ/Rot-YMGW7			NADH-YMGW8			Succ/Rot-YMGW8
Tissue: Gonadal White Adipose Tissue (gWAT)			1.30951	9.11857	9.84287	2.23374	-1.9969	4.32981	27.2388	5.75119	-0.873821	1.42104	5.54815	4.77806	1.77247	7.10112	0.334636	-3.96208	6.33403	16.834	24.7888	3.04201	7.24533	3.23568	14.9632	0.317401	9.97869	4.55609	4.70728	3.22815	7.13583	10.3035	4.54627	9.98858	7.74625	10.3058	5.15321	7.44624	3.31973	10.4526	6.34382	-8.37161	-5.18567	2.51532	4.1535	-6.84718	34.1367	4.72139	4.709
Tissue prep: Frozen			5.75478	10.4093	8.71559	3.14118	0.881701	13.6974	16.7465	8.49833	10.4721	2.01177	8.83889	4.03859	3.28007	5.83885	2.63647	8.70381	8.34319	10.8662	14.9122	4.09027	23.7705	3.27158	16.2036	2.03208	11.011	10.7026	6.00014	4.4138	12.7524	13.4043	3.09455	13.2451	19.3362	8.36183	6.19163	2.12275	8.98253	5.85225	-3.26766	6.37611	3.92874	4.50504	15.4569	4.03108	52.3992	13.7663	5.53977
Entire region, bilateral			10.1948	12.0698	7.3468	3.15321	1.39547	13.9548	16.1494	6.39256	10.5759	0.627443	7.44749	2.68187	3.42179	4.12723	2.14553	9.34215	7.78624	9.50837	12.3043	4.9881	22.6611	4.72026	12.9551	1.42498	11.7929	8.51958	7.33959	4.14248	12.1621	15.8753	3.88234	11.9329	21.501	5.52698	7.90251	2.91738	11.4366	4.68921	3.56626	13.3323	2.84176	5.16258	12.7529	13.14	7.04832	13.2687	5.45071
2 mL 1X MAS used			14.725	56.1252	63.0702	52.9698	217.292	199.528	198.46	8.27808	25.609	21.2184	91.8635	90.1185	88.5489	3.22481	31.0757	6.76124	36.9842	21.8154	22.1972	46.981	66.8953	75.9072	143.728	145.36	144.588	55.655	65.5377	63.8917	136.716	136.825	125.849	56.9042	53.9418	61.8548	111.561	103.228	107.625	23.9927	22.3873	29.1088	36.4175	52.336	29.347	36.0977	49.9072	16.4469	105.417
7 ml homogenizer used			19.1682	51.5421	50.2086	47.0838	218.554	198.883	197.258	4.98448	22.0844	17.2007	83.6404	87.339	81.3995	-1.28785	22.4433	1.74656	35.3716	21.2301	21.2526	40.8329	58.434	58.9395	130.989	147.4	144.94	49.2637	55.3719	53.073	134.358	133.191	120.056	48.2562	53.0858	52.1036	112.178	107.242	107.069	17.7942	17.2837	26.8024	40.2909	43.4149	27.5752	37.1489	16.8827	14.8818	103.408
Sex: male and female			23.6072	45.501	42.7501	44.6655	214.177	192.617	190.815	2.76839	21.2746	14.0266	79.7366	80.4438	74.6154	-1.08053	16.1162	-0.908438	33.2664	20.3282	21.2334	41.2854	48.5319	48.6204	122.609	142.657	137.718	42.8391	47.4511	45.9616	127.291	125.875	112.621	42.309	46.7074	44.0942	108.762	103.368	101.447	20.3843	14.276	24.4436	36.5067	37.3208	29.287	28.9704	16.2289	11.8477	95.3388
Strain: C57BL/6J			28.1345	-8.81185	17.8551	-5.581	-8.8211	-9.34437	-2.77604	-10.4378	7.18179	-13.0751	2.11062	-8.24696	-9.05088	-11.4687	3.24781	-7.81617	4.09806	15.6557	0.455917	-2.39793	19.6038	-10.4458	15.68	3.22274	-8.80543	-0.249447	7.77242	15.9425	5.62148	3.15991	-5.89868	-3.72996	-5.27287	-3.46543	-6.82973	-9.46799	-7.13991	-3.98133	-4.19062	7.08406	4.71652	-1.99931	-7.71364	1.27187	-1.64614	-9.72354	-5.52809
Diet: Standard Chow			32.5764	-7.41557	12.0509	-4.85377	-9.82614	-7.11624	-1.28774	-10.1781	5.40182	-10.7091	2.30868	-3.04015	-2.94517	-7.83039	4.469	-5.09971	3.51478	12.496	2.73085	0.738291	10.7686	-7.19193	10.1235	3.67668	-9.22745	1.80348	9.25514	3.71127	9.79122	6.14211	-0.680545	-2.03483	1.48374	-0.775935	-8.45815	-8.40353	-3.68347	-2.38802	-3.29468	6.91466	5.90843	0.582008	-7.58958	3.60752	-1.85501	-7.87887	-1.00537
Age: 10 weeks			37.0162	-5.72321	8.76474	-2.834	-5.71895	-1.52807	2.63945	-8.81201	4.30183	-8.86137	4.55715	-0.989463	0.268935	-6.02859	5.2739	-4.77454	6.11038	12.0354	3.47995	8.42211	11.4886	-4.99291	10.8766	-0.598078	-7.90011	3.24867	8.9767	5.4373	10.2715	10.9892	0.168664	-1.27305	6.20238	-0.814665	-5.59222	-5.4271	0.678289	-0.478305	-1.55869	6.76184	8.60919	2.31497	3.43889	-9.89178	-0.435132	-6.30276	3.48569
Protein used: 10-15 ug/well			41.5417	164.372	153.795	155.313	293.842	213.683	180.507	100.064	88.975	98.5572	171.564	148.746	123.762	24.2601	18.7706	20.7875	34.8036	28.2509	37.0046	166.347	152.24	174.427	160.398	176.529	190.805	189.765	165.526	161.048	211.056	171.281	171.11	211.018	157.433	157.203	143.56	124.933	129.478	32.8902	32.8657	43.4184	36.3289	49.1641	34.1384	92.1264	85.0267	106.667	129.523
			45.9833	170.692	158.234	139.814	333.55	190.019	156.02	113.06	87.4359	92.8848	164.923	147.51	121.848	28.8229	20.0493	24.171	36.3025	30.8876	34.8221	143.333	145.109	154.413	183.608	155.855	181.056	202.112	166.894	123.227	203.986	162.246	160.321	196.816	130.438	123.941	123.32	110.747	115.019	30.7288	34.8236	40.5535	39.4007	41.3028	36.5025	97.14	88.0693	104.366	129.024
SHEET LEGEND:			50.4247	159.606	147.845	124.045	329.469	169.176	136.46	110.652	79.4786	82.959	148.72	136.27	113.349	28.2498	20.513	22.1404	35.1222	31.0838	30.1931	123.154	132.802	134.846	182.16	132.749	165.781	187.606	151.129	100.439	181.762	144.663	141.972	170.719	109.451	102.885	107.454	95.3993	99.7782	27.6417	31.6668	36.534	37.3817	39.0556	34.8901	91.4639	81.4966	95.4516	119.413
YM = Young Male			54.9453	10.9314	17.6963	8.35347	26.2639	12.04	23.3477	7.07981	7.99383	10.9248	14.3404	12.8496	5.82752	1.98304	5.04244	2.10753	2.88628	7.5592	2.3814	15.6384	46.507	6.76927	32.3715	6.90467	14.5154	14.5633	9.12322	10.1885	20.317	19.7851	11.7842	13.0832	2.87584	9.24287	15.504	9.4795	8.76232	4.40082	-6.03629	6.95791	8.78081	-2.35002	-4.70983	-0.002591	7.43583	2.89633	5.21918
YF = Young Female			59.3894	8.63919	16.3441	6.32219	21.3218	10.5182	20.455	5.52534	7.94957	7.1856	9.58481	9.66355	4.40257	2.72998	4.3459	0.587164	2.68972	6.33737	0.836069	12.4872	34.1383	5.2127	24.4999	3.23602	12.4868	14.1245	8.54958	8.10275	19.2919	15.3892	8.54559	9.72065	3.6952	6.17617	13.9389	7.53925	6.45088	1.69798	-6.67257	6.48102	5.56045	-1.23651	-6.3155	-0.164205	5.92496	2.94771	2.40974
OM = Old Male			63.8401	10.1086	18.9555	7.93276	23.633	12.6887	20.9339	6.37747	9.52476	7.15577	9.46491	9.2508	6.81837	3.13629	3.64674	1.51559	2.78442	6.62212	0.425259	12.3017	30.0106	6.13961	23.3532	3.65182	13.0371	14.1842	9.89584	8.51023	19.0471	14.159	9.81088	9.91473	8.07112	7.33031	13.3675	7.37288	4.48907	1.77331	-5.22754	7.03652	8.60882	-1.61062	-6.75983	1.8198	6.97588	4.76466	3.34759
OF = Old Female
GW = Gonadal White Adipose Tissue (gWAT)	Biological Sample Average:		Time (minutes)	NADH-YMGW1	NADH-YMGW2	NADH-YMGW3	NADH-YMGW4	NADH-YMGW5	NADH-YMGW6	NADH-YMGW7	NADH-YMGW8	NADH-YMGW9	NADH-YMGW10		Succ/Rot-YMGW1	Succ/Rot-YMGW2	Succ/Rot-YMGW3	Succ/Rot-YMGW4	Succ/Rot-YMGW5	Succ/Rot-YMGW6	Succ/Rot-YMGW7	Succ/Rot-YMGW8	Succ/Rot-YMGW9	Succ/Rot-YMGW10			NADH-YFGW1	NADH-YFGW2	NADH-YFGW3	NADH-YFGW4	NADH-YFGW5	NADH-YFGW6	NADH-YFGW7	NADH-YFGW8	NADH-YFGW9	NADH-YFGW10		Succ/Rot-YFGW1	Succ/Rot-YFGW2	Succ/Rot-YFGW3	Succ/Rot-YFGW4	Succ/Rot-YFGW5	Succ/Rot-YFGW6	Succ/Rot-YFGW7	Succ/Rot-YFGW8	Succ/Rot-YFGW9	Succ/Rot-YFGW10
1, 2, 3…10 = sample number	(the average of three technical replicates per biological sample)		1.30951	7.06506	2.09947	1.15789	4.50767	4.16384	9.34686	2.80829	10.6703	6.92162	3.72764		9.85724	4.03289	15.9856	8.41977	7.32853	5.30639	0.494383	3.69933	4.20059	15.129			2.71013	5.70231	9.7483	8.44403	1.28247	8.69607	8.53582	1.58656	3.52252	2.27088		10.4547	21.1933	0.21393	9.92056	8.06223	5.5963	13.5961	14.9091	4.89412	30.5671
MTDR = mitoTracker Deep Red			5.75478	7.42201	6.99407	5.72638	10.3775	7.03885	13.6477	2.9869	23.3989	7.76142	14.9653		10.4419	5.38585	11.3738	9.74889	9.75044	5.76564	7.96356	5.19802	7.53079	17.6966			2.32181	10.9528	8.32369	7.46592	12.3556	6.0213	3.48619	11.8098	10.3508	5.74711		8.75302	16.5768	-2.85537	8.15333	10.335	8.5187	11.2651	-3.09097	6.57748	32.0966
			10.1948	7.52328	5.86531	5.20497	10.7898	6.66721	12.987	7.19593	11.1523	12.8485	16.9539		10.4999	4.51705	9.86631	8.72433	10.6399	7.41882	6.91909	8.74832	13.7728	23.3428			4.56471	12.7609	7.74926	7.95599	16.3235	8.39121	3.72134	18.5984	9.85126	5.79973		8.20562	19.5158	4.17426	10.1933	12.9762	9.73972	12.7287	9.29682	8.33795	36.2975
			14.725	57.3884	18.3685	13.6872	63.2612	61.6948	57.5669	25.1629	34.1506	53.9194	33.7825		205.093	90.177	26.9989	144.559	133.13	107.472	39.3668	98.1119	92.0269	72.1991			17.7199	21.149	31.8008	23.1622	46.3519	35.6707	42.1191	46.3336	44.2536	64.8942		38.6548	62.8289	71.1402	55.1886	146.987	91.0639	165.538	141.077	195.56	190.05
			19.1682	49.6115	14.7565	7.634	52.7354	52.5695	51.1485	20.6268	22.9711	45.997	29.2773		204.899	84.1263	25.9514	141.109	129.202	108.829	37.0937	94.6473	92.7721	70.3618			16.687	19.1815	24.865	18.1272	38.9483	27.1921	34.4688	43.8411	38.3552	54.5445		36.4296	58.6157	71.4322	49.3355	138.731	89.2805	142.903	141.226	194.005	185.756
			23.6072	44.3055	12.6899	4.70908	46.1459	45.4173	44.3702	19.7013	19.0156	36.8978	28.3265		199.203	78.2653	24.9426	134.328	121.929	104.525	34.3715	87.3491	89.0775	65.3971			12.0183	14.6598	20.0896	12.6786	34.8981	22.5844	28.4655	43.2636	34.1342	50.2543		34.4316	52.5997	64.1362	48.746	131.496	84.5062	127.207	134.926	183.561	180.098
			28.1345	1.15407	-5.44369	-5.34569	2.25338	7.82184	-4.15609	-0.362633	-3.36594	7.52118	13.1987		-6.9805	-5.06241	6.73656	3.36576	0.960906	-7.81255	-1.66548	4.25467	4.81131	7.14504			5.76157	4.78808	8.22961	9.2485	1.89759	-0.781582	0.544132	19.0278	9.45964	9.40216		2.92186	-4.18132	1.32724	-1.22541	-1.89791	-5.53967	-1.0213	6.48705	2.07099	23.7073
			32.5764	-0.072815	-5.1618	-2.82037	1.43832	4.9233	-0.442341	0.410655	-2.04212	7.22892	12.5859		-6.07671	-1.22555	6.24722	1.52424	5.08426	-6.84839	-0.366379	4.81896	7.30401	5.26985			4.00909	7.84837	8.22378	7.87882	1.60115	-0.967629	0.839098	20.7407	5.60357	7.28808		4.14853	-1.14698	2.76036	2.30159	-0.469743	-3.06261	3.16279	7.72404	3.92162	20.7173
			37.0162	0.0691773	-4.45718	-1.84308	4.97258	5.88756	1.37156	1.57495	-5.54323	7.27038	11.6383		-1.53586	1.27887	7.20858	0.792797	7.1431	-3.44701	4.78768	8.01247	10.1375	6.32764			4.27116	3.48567	7.92516	3.76533	3.54275	0.793764	1.8477	22.6074	8.27738	8.38301		3.6179	1.26899	2.99413	3.82049	17.532	-0.847369	8.32257	9.60557	8.25394	28.8211
			41.5417	157.827	95.8655	21.2727	164.338	172.113	175.218	36.3914	94.6067	201.734	118.928		229.344	148.024	33.353	175.911	184.482	132.657	39.8771	124.904	156.167	147.662			42.9208	59.0269	72.5439	73.2815	131.283	79.7946	143.803	166.681	285.558	241.211		55.4032	65.9982	73.1709	63.0561	160.68	107.615	155.39	214.29	295.612	289.772
			45.9833	156.247	97.7934	24.3477	147.618	164.078	150.398	35.3686	96.5252	207.192	127.437		226.53	144.76	34.0041	173.506	175.518	116.362	39.0686	127.362	162.407	156.068			47.1834	56.0275	73.8246	73.9484	130.037	80.8817	142.864	173.375	290.743	256.415		59.7815	63.8468	74.8436	65.9544	163.497	108.742	155.167	229.029	268.428	305.189
			50.4247	143.832	91.03	23.6344	130.267	146.391	127.685	31.9475	89.4707	189.58	118.414		211.701	132.78	32.133	160.23	156.132	100.877	37.1091	118.705	151.658	146.275			45.4108	50.8228	68.3252	69.3494	122.176	75.016	132.265	163.419	272.634	244.501		57.0352	61.016	71.1106	62.9272	153.8	102.628	142.682	215.32	183.759	265.478
			54.9453	12.3271	8.66614	3.04433	22.9716	11.2917	8.40062	1.77415	3.44319	19.1075	10.0455		20.5505	11.0058	4.27562	17.9305	17.2954	11.2486	0.573653	9.63863	16.0416	15.8765			-4.39123	-0.0264703	10.2001	1.1073	6.28748	9.73849	11.1286	15.6532	14.115	19.6974		5.06549	10.4363	6.10138	5.58152	9.84915	10.4527	21.4396	26.5823	39.0731	60.5802
			59.3894	10.4352	6.88684	2.55435	17.2794	10.2589	6.53067	0.502143	2.90282	13.8734	7.75979		17.4317	7.88364	3.28772	13.4076	14.4089	9.30968	-0.663852	6.43005	10.9725	10.7457			-2.36911	1.91177	9.00743	1.43113	9.81955	9.28472	10.9092	16.145	14.989	18.1134		3.29908	8.12308	3.92599	2.97804	9.80294	11.9926	20.2591	21.3832	32.2333	39.637
			63.8401	12.3323	7.686	2.76621	16.1506	10.8634	8.43872	1.1941	4.52011	13.8671	8.22232		19.0852	8.51136	3.27727	13.3474	14.339	8.40983	0.0794553	6.97671	10.3424	11.2576			-0.125387	1.78414	7.35269	2.42018	12.362	10.0427	11.6192	15.9011	17.0163	21.3894		3.48232	7.44993	3.56153	4.11222	13.2155	12.308	21.4056	21.8517	31.7541	66.3361
	Complex Linked Resp. Averages:			YMGW1	YMGW2	YMGW3	YMGW4	YMGW5	YMGW6	YMGW7	YMGW8	YMGW9	YMGW10														YFGW1	YFGW2	YFGW3	YFGW4	YFGW5	YFGW6	YFGW7	YFGW8	YFGW9	YFGW10
	(average of three consectutive time points)		CI	50.4352	15.2716	8.67677	54.0475	53.2272	51.0285	21.8303	25.3791	45.6047	30.4621													CI	15.4751	18.3301	25.5852	17.9893	40.0661	28.4824	35.0178	44.4794	38.9143	56.5643
			CII	203.065	84.1895	25.9643	139.999	128.087	106.942	36.944	93.3695	91.2921	69.3193													CII	36.5053	58.0148	68.9029	51.09	139.071	88.2835	145.216	139.077	191.042	185.301
			CIV	187.58	118.376	28.1242	158.645	166.452	133.866	36.6271	108.595	178.123	135.797													CIV	51.2892	59.4564	72.3031	68.0862	143.579	92.4462	145.362	193.686	266.123	267.095
	Biological Sample Avg/ug pro:		Time (minutes)	NADH-YMGW1	NADH-YMGW2	NADH-YMGW3	NADH-YMGW4	NADH-YMGW5	NADH-YMGW6	NADH-YMGW7	NADH-YMGW8	NADH-YMGW9	NADH-YMGW10		Succ/Rot-YMGW1	Succ/Rot-YMGW2	Succ/Rot-YMGW3	Succ/Rot-YMGW4	Succ/Rot-YMGW5	Succ/Rot-YMGW6	Succ/Rot-YMGW7	Succ/Rot-YMGW8	Succ/Rot-YMGW9	Succ/Rot-YMGW10			NADH-YFGW1	NADH-YFGW2	NADH-YFGW3	NADH-YFGW4	NADH-YFGW5	NADH-YFGW6	NADH-YFGW7	NADH-YFGW8	NADH-YFGW9	NADH-YFGW10		Succ/Rot-YFGW1	Succ/Rot-YFGW2	Succ/Rot-YFGW3	Succ/Rot-YFGW4	Succ/Rot-YFGW5	Succ/Rot-YFGW6	Succ/Rot-YFGW7	Succ/Rot-YFGW8	Succ/Rot-YFGW9	Succ/Rot-YFGW10
			1.30951	0.471004	0.161498	0.0771929	0.300512	0.277589	0.623124	0.187219	0.711354	0.494401	0.26626		0.657149	0.310222	1.06571	0.561318	0.488569	0.35376	0.0329589	0.246622	0.300042	1.08065			0.542026	0.475192	0.812358	0.603145	0.128247	0.790552	0.569055	0.113326	0.251609	0.162206		2.09094	1.76611	0.0178275	0.708611	0.806223	0.508755	0.90641	1.06494	0.34958	2.18337
			5.75478	0.494801	0.538006	0.381759	0.69183	0.469256	0.909848	0.199127	1.55992	0.554387	1.06895		0.696124	0.414296	0.758256	0.649926	0.650029	0.384376	0.530904	0.346535	0.537913	1.26404			0.464362	0.912731	0.693641	0.53328	1.23556	0.547391	0.232413	0.843555	0.739341	0.410508		1.7506	1.3814	-0.237947	0.582381	1.0335	0.774428	0.751006	-0.220783	0.46982	2.29261
			10.1948	0.501552	0.451178	0.346998	0.719321	0.444481	0.865799	0.479729	0.74349	0.917753	1.21099		0.699992	0.347465	0.657754	0.581622	0.709327	0.494588	0.461272	0.583221	0.98377	1.66734			0.912942	1.06341	0.645772	0.568285	1.63235	0.762837	0.248089	1.32846	0.703661	0.414266		1.64112	1.62631	0.347855	0.728092	1.29762	0.885429	0.848583	0.664059	0.595568	2.59268
			14.725	3.82589	1.41296	0.912483	4.21741	4.11299	3.83779	1.67753	2.27671	3.85139	2.41304		13.6729	6.93669	1.79993	9.63725	8.87534	7.16478	2.62446	6.5408	6.57335	5.15708			3.54397	1.76242	2.65007	1.65444	4.63519	3.24279	2.80794	3.30954	3.16097	4.6353		7.73095	5.23574	5.92835	3.94204	14.6987	8.27853	11.0359	10.0769	13.9686	13.575
			19.1682	3.30743	1.13512	0.508933	3.5157	3.50463	3.4099	1.37512	1.53141	3.2855	2.09124		13.6599	6.47125	1.73009	9.40729	8.61346	7.2553	2.47291	6.30982	6.62658	5.02584			3.33741	1.59846	2.07209	1.2948	3.89483	2.47201	2.29792	3.13151	2.73965	3.89604		7.28592	4.88464	5.95268	3.52396	13.8731	8.11641	9.52688	10.0876	13.8575	13.2683
			23.6072	2.9537	0.976143	0.313939	3.07639	3.02782	2.95801	1.31342	1.26771	2.63556	2.02332		13.2802	6.0204	1.66284	8.95518	8.1286	6.96836	2.29143	5.82328	6.36268	4.67122			2.40365	1.22165	1.67414	0.905613	3.48981	2.05313	1.8977	3.09026	2.43816	3.5896		6.88632	4.38331	5.34468	3.48186	13.1496	7.68238	8.48043	9.63759	13.1115	12.8641
			28.1345	0.0769383	-0.418745	-0.356379	0.150226	0.521456	-0.277072	-0.0241755	-0.224396	0.537227	0.942761		-0.465367	-0.389416	0.449104	0.224384	0.0640604	-0.520836	-0.111032	0.283644	0.343665	0.51036			1.15231	0.399007	0.685801	0.660607	0.189759	-0.0710529	0.0362754	1.35913	0.675689	0.671583		0.584371	-0.348444	0.110604	-0.0875292	-0.189791	-0.503607	-0.0680868	0.46336	0.147928	1.69338
			32.5764	-0.00485433	-0.397061	-0.188025	0.0958878	0.32822	-0.0294894	0.027377	-0.136141	0.516351	0.89899		-0.405114	-0.0942729	0.416482	0.101616	0.338951	-0.456559	-0.0244253	0.321264	0.521715	0.376418			0.801818	0.654031	0.685315	0.562773	0.160115	-0.0879662	0.0559399	1.48148	0.400255	0.520577		0.829706	-0.0955813	0.23003	0.164399	-0.0469743	-0.278419	0.210853	0.551717	0.280116	1.47981
			37.0162	0.00461182	-0.34286	-0.122872	0.331505	0.392504	0.0914371	0.104996	-0.369548	0.519313	0.831306		-0.102391	0.0983749	0.480572	0.0528531	0.476207	-0.229801	0.319179	0.534165	0.724111	0.451975			0.854232	0.290472	0.66043	0.268952	0.354275	0.0721604	0.12318	1.61481	0.591242	0.598787		0.723579	0.105749	0.249511	0.272892	1.7532	-0.0770336	0.554838	0.686112	0.589567	2.05865
			41.5417	10.5218	7.37427	1.41818	10.9559	11.4742	11.6812	2.42609	6.30711	14.4096	8.49483		15.2896	11.3865	2.22353	11.7274	12.2988	8.84379	2.65848	8.3269	11.1548	10.5473			8.58416	4.91891	6.04532	5.23439	13.1283	7.25405	9.58686	11.9058	20.397	17.2293		11.0806	5.49985	6.09758	4.504	16.068	9.78317	10.3594	15.3064	21.1152	20.698
			45.9833	10.4164	7.52257	1.62318	9.84122	10.9385	10.0265	2.35791	6.43502	14.7994	9.10266		15.102	11.1354	2.26694	11.5671	11.7012	7.75747	2.60458	8.49078	11.6005	11.1477			9.43668	4.66896	6.15205	5.28203	13.0037	7.35288	9.52426	12.3839	20.7674	18.3154		11.9563	5.32057	6.23696	4.71103	16.3497	9.88566	10.3445	16.3592	19.1734	21.7992
			50.4247	9.58879	7.00231	1.57563	8.68449	9.7594	8.51233	2.12983	5.96471	13.5415	8.45816		14.1134	10.2138	2.1422	10.682	10.4088	6.72514	2.47394	7.91367	10.8327	10.4482			9.08216	4.23523	5.69377	4.95353	12.2176	6.81964	8.81768	11.6728	19.4739	17.4644		11.407	5.08467	5.92589	4.4948	15.38	9.32982	9.51213	15.38	13.1257	18.9627
			54.9453	0.821805	0.666626	0.202956	1.53144	0.752778	0.560041	0.118276	0.229546	1.36482	0.717532		1.37003	0.846602	0.285042	1.19537	1.15303	0.749906	0.0382435	0.642575	1.14583	1.13404			-0.878246	-0.00220586	0.850006	0.079093	0.628748	0.885317	0.741905	1.11809	1.00821	1.40696		1.0131	0.86969	0.508448	0.39868	0.984915	0.950241	1.42931	1.89874	2.79094	4.32716
			59.3894	0.695677	0.529757	0.17029	1.15196	0.683929	0.435378	0.0334762	0.193521	0.990958	0.554271		1.16211	0.606434	0.219181	0.893838	0.960593	0.620646	-0.0442568	0.42867	0.783753	0.767553			-0.473821	0.159314	0.750619	0.102224	0.981955	0.844065	0.72728	1.15321	1.07064	1.29382		0.659817	0.676923	0.327166	0.212717	0.980294	1.09024	1.35061	1.52737	2.30238	2.83121
			63.8401	0.822152	0.591231	0.184414	1.07671	0.724228	0.562581	0.0796064	0.301341	0.99051	0.587309		1.27235	0.65472	0.218484	0.889824	0.955931	0.560656	0.00529702	0.465114	0.738744	0.804117			-0.0250775	0.148678	0.612724	0.17287	1.2362	0.912972	0.774616	1.13579	1.21545	1.52781		0.696465	0.620827	0.296794	0.29373	1.32155	1.11891	1.42704	1.56084	2.26815	4.73829
	Complex Linked Resp. Avg/ug pro:			YMGW1	YMGW2	YMGW3	YMGW4	YMGW5	YMGW6	YMGW7	YMGW8	YMGW9	YMGW10														YFGW1	YFGW2	YFGW3	YFGW4	YFGW5	YFGW6	YFGW7	YFGW8	YFGW9	YFGW10
			CI	3.36234	1.17474	0.578452	3.60317	3.54848	3.4019	1.45536	1.69194	3.25748	2.17586													CI	3.09501	1.52751	2.1321	1.28495	4.00661	2.58931	2.33452	3.1771	2.7796	4.04031
			CII	13.5377	6.47612	1.73096	9.33324	8.53914	7.12948	2.46293	6.22463	6.52087	4.95138													CII	7.30107	4.83456	5.7419	3.64929	13.9071	8.02577	9.68107	9.93404	13.6458	13.2358
			CIV	12.5053	9.10581	1.87494	10.5763	11.0968	8.92441	2.44181	7.2397	12.7231	9.69981													CIV	10.2578	4.9547	6.02526	4.8633	14.3579	8.4042	9.69079	13.8347	19.0088	19.0782
	Biological Sample Avg/MTDR:		Time (minutes)	NADH-YMGW1	NADH-YMGW2	NADH-YMGW3	NADH-YMGW4	NADH-YMGW5	NADH-YMGW6	NADH-YMGW7	NADH-YMGW8	NADH-YMGW9	NADH-YMGW10		Succ/Rot-YMGW1	Succ/Rot-YMGW2	Succ/Rot-YMGW3	Succ/Rot-YMGW4	Succ/Rot-YMGW5	Succ/Rot-YMGW6	Succ/Rot-YMGW7	Succ/Rot-YMGW8	Succ/Rot-YMGW9	Succ/Rot-YMGW10			NADH-YFGW1	NADH-YFGW2	NADH-YFGW3	NADH-YFGW4	NADH-YFGW5	NADH-YFGW6	NADH-YFGW7	NADH-YFGW8	NADH-YFGW9	NADH-YFGW10		Succ/Rot-YFGW1	Succ/Rot-YFGW2	Succ/Rot-YFGW3	Succ/Rot-YFGW4	Succ/Rot-YFGW5	Succ/Rot-YFGW6	Succ/Rot-YFGW7	Succ/Rot-YFGW8	Succ/Rot-YFGW9	Succ/Rot-YFGW10
			1.30951	0.000208933	0.000111872	4.46227e-05	0.000120093	0.000124819	0.000254204	8.48187e-05	0.000460505	0.000202061	0.000168102		0.000291506	0.000214896	0.000616051	0.00022432	0.000219686	0.000144317	1.49319e-05	0.000159654	0.000122627	0.00068226			0.000238	0.000405521	0.000663199	0.000517286	7.42602e-05	0.000440935	0.000402127	9.01891e-05	0.00012426	8.80627e-05		0.00091812	0.00150717	1.45541e-05	0.000607739	0.000466837	0.000283761	0.000640521	0.000847517	0.000172645	0.00118537
			5.75478	0.000219489	0.000372685	0.000220683	0.000276476	0.000211002	0.000371174	9.02133e-05	0.00100984	0.000226577	0.000674874		0.000308795	0.00028699	0.000438324	0.00025973	0.000292287	0.000156807	0.000240523	0.000224334	0.000219844	0.000798046			0.000203898	0.000778908	0.00056628	0.000457367	0.00071544	0.00030531	0.000164236	0.000671334	0.000365134	0.000222868		0.000768678	0.00117886	-0.000194257	0.000499478	0.000598443	0.000431941	0.000530704	-0.000175708	0.000232027	0.00124468
			10.1948	0.000222484	0.000312538	0.000200589	0.000287463	0.000199862	0.000353204	0.000217339	0.000481308	0.000375084	0.000764553		0.000310511	0.000240695	0.000380227	0.000232434	0.000318951	0.000201768	0.000208977	0.000377556	0.000402065	0.00105267			0.000400867	0.000907496	0.0005272	0.000487389	0.000945198	0.000425477	0.000175314	0.00105724	0.000347513	0.000224908		0.000720606	0.00138787	0.000283985	0.000624447	0.000751378	0.000493853	0.000599657	0.000528484	0.000294129	0.00140758
			14.725	0.00169713	0.00097878	0.000527477	0.0016854	0.00184942	0.00156563	0.000759995	0.00147386	0.00157406	0.00152346		0.00606518	0.00480516	0.00104048	0.00385133	0.00399082	0.00292288	0.001189	0.00423427	0.00268652	0.00325589			0.00155614	0.00150402	0.00216348	0.00141893	0.00268397	0.00180869	0.00198425	0.00263386	0.00156109	0.00251654		0.00339461	0.00446809	0.00483983	0.00338089	0.00851116	0.0046174	0.00779858	0.00801962	0.00689857	0.00736995
			19.1682	0.00146715	0.000786313	0.000294198	0.00140498	0.00157587	0.00139107	0.00062299	0.000991377	0.00134278	0.00132029		0.00605942	0.00448274	0.00100011	0.00375944	0.00387306	0.00295981	0.00112034	0.00408475	0.00270827	0.00317304			0.00146543	0.00136409	0.00169163	0.00111048	0.00225527	0.00137878	0.00162384	0.00249218	0.00135302	0.00211519		0.0031992	0.00416846	0.0048597	0.00302232	0.00803313	0.00452697	0.00673224	0.00802811	0.0068437	0.00720343
			23.6072	0.00131024	0.00067619	0.000181478	0.00122942	0.00136147	0.00120672	0.000595039	0.000820669	0.00107715	0.00127741		0.00589098	0.00417043	0.000961236	0.00357876	0.00365505	0.00284275	0.00103812	0.00376978	0.00260041	0.00294915			0.00105543	0.00104254	0.00136674	0.000776698	0.00202075	0.00114515	0.00134102	0.00245935	0.00120412	0.00194882		0.00302374	0.00374064	0.00436333	0.00298621	0.00761415	0.00428489	0.00599276	0.00766997	0.00647528	0.00698404
			28.1345	3.41292e-05	-0.000290072	-0.000206011	6.00347e-05	0.000234474	-0.000113032	-1.09526e-05	-0.000145266	0.000219564	0.000595207		-0.000206433	-0.000269755	0.000259613	8.96707e-05	2.88049e-05	-0.000212476	-5.03024e-05	0.000183621	0.000140455	0.000322213			0.000505973	0.000340505	0.000559879	0.000566569	0.000109878	-3.96301e-05	2.56343e-05	0.00108165	0.000333698	0.000364607		0.000256593	-0.000297355	9.02954e-05	-7.50693e-05	-0.000109897	-0.000280889	-4.81141e-05	0.00036876	7.30562e-05	0.000919348
			32.5764	-2.15334e-06	-0.000275051	-0.000108691	3.83197e-05	0.000147585	-1.20302e-05	1.2403e-05	-8.81329e-05	0.000211032	0.000567572		-0.000179705	-6.53044e-05	0.000240755	4.06088e-05	0.00015241	-0.000186254	-1.10658e-05	0.000207975	0.000213224	0.000237649			0.000352073	0.000558138	0.000559483	0.000482662	9.27135e-05	-4.90637e-05	3.95303e-05	0.00117902	0.000197671	0.000282625		0.000364318	-8.15673e-05	0.000187793	0.000140997	-2.72001e-05	-0.00015529	0.000149001	0.000439078	0.000138339	0.000803397
			37.0162	2.04576e-06	-0.000237505	-7.10282e-05	0.00013248	0.00017649	3.73019e-05	4.75681e-05	-0.000239232	0.000212242	0.00052484		-4.54196e-05	6.81459e-05	0.000277803	2.11217e-05	0.000214128	-9.37475e-05	0.000144602	0.000345799	0.000295943	0.000285352			0.000375088	0.000247884	0.000539167	0.000230666	0.00020514	4.02479e-05	8.7046e-05	0.00128513	0.000291993	0.000325085		0.000317719	9.02443e-05	0.000203698	0.000234045	0.00101518	-4.29659e-05	0.00039208	0.000546035	0.000291166	0.00111766
			41.5417	0.00466737	0.00510828	0.000819806	0.0043783	0.0051594	0.00476536	0.00109913	0.004083	0.00588918	0.00536317		0.00678233	0.0078876	0.00128535	0.00468662	0.00553019	0.00360784	0.00120441	0.00539053	0.00455895	0.00665896			0.00376925	0.00419771	0.00493533	0.00448927	0.00760186	0.00404599	0.00677463	0.00947509	0.0100734	0.00935393		0.00486543	0.00469347	0.00497799	0.00386285	0.00930402	0.00545662	0.00732051	0.0121815	0.010428	0.0112371
			45.9833	0.00462064	0.00521101	0.000938309	0.00393285	0.00491853	0.00409034	0.00106824	0.0041658	0.00604851	0.00574691		0.0066991	0.00771368	0.00131044	0.00462255	0.00526146	0.00316467	0.00117999	0.00549663	0.00474111	0.00703805			0.00414358	0.00398441	0.00502246	0.00453012	0.00752968	0.00410111	0.00673039	0.00985561	0.0102562	0.00994355		0.00524993	0.00454048	0.00509178	0.00404041	0.00946714	0.00551378	0.00731	0.0130193	0.00946906	0.011835
			50.4247	0.0042535	0.00485061	0.00091082	0.00347058	0.00438834	0.00347261	0.00096491	0.00386134	0.00553437	0.00534001		0.00626059	0.0070753	0.00123834	0.00426885	0.00468036	0.00274353	0.00112081	0.00512302	0.00442732	0.00659642			0.00398792	0.00361427	0.00464832	0.00424839	0.0070745	0.00380369	0.00623107	0.00928963	0.00961745	0.00948153		0.00500876	0.00433916	0.00483782	0.00385496	0.00890569	0.00520376	0.00672181	0.01224	0.00648229	0.010295
			54.9453	0.000364546	0.000461783	0.000117322	0.000612008	0.000338488	0.00022847	5.35845e-05	0.0001486	0.000557799	0.00045301		0.000607735	0.000586455	0.000164773	0.000477705	0.000518461	0.000305925	1.7326e-05	0.00041598	0.000468299	0.000715969			-0.000385632	-1.88244e-06	0.000693935	6.7834e-05	0.000364072	0.000493791	0.000524273	0.000889818	0.00049792	0.000763847		0.000444844	0.000742178	0.000415091	0.000341928	0.000570307	0.000530002	0.00101003	0.00151109	0.00137834	0.00234925
			59.3894	0.000308596	0.000366971	9.84391e-05	0.000460358	0.00030753	0.000177613	1.51662e-05	0.000125279	0.000405003	0.000349936		0.000515504	0.000420087	0.000126702	0.000357204	0.000431933	0.000253193	-2.00503e-05	0.000277505	0.000320318	0.00048459			-0.000208052	0.000135956	0.000612796	8.76721e-05	0.000568593	0.000470782	0.000513938	0.000917773	0.000528752	0.000702422		0.000289721	0.000577674	0.000267094	0.000182436	0.000567631	0.000608088	0.000954417	0.00121554	0.00113706	0.00153709
			63.8401	0.0003647	0.000409555	0.000106604	0.000430285	0.000325651	0.000229506	3.60653e-05	0.000195077	0.00040482	0.000370794		0.000564402	0.000453535	0.000126299	0.0003556	0.000429837	0.00022872	2.39979e-06	0.000301098	0.000301923	0.000507675			-1.10113e-05	0.000126879	0.00050022	0.000148262	0.000715812	0.000509215	0.000547388	0.000903907	0.000600268	0.000829461		0.000305813	0.000529803	0.000242299	0.000251917	0.000765235	0.000624077	0.00100843	0.00124218	0.00112016	0.00257245
	Complex Linked Resp. Avg/MTDR:			YMGW1	YMGW2	YMGW3	YMGW4	YMGW5	YMGW6	YMGW7	YMGW8	YMGW9	YMGW10														YFGW1	YFGW2	YFGW3	YFGW4	YFGW5	YFGW6	YFGW7	YFGW8	YFGW9	YFGW10
			CI	0.00149151	0.000813761	0.000334384	0.00143993	0.00159558	0.00138781	0.000659342	0.0010953	0.00133133	0.00137372													CI	0.001359	0.00130355	0.00174062	0.00110204	0.00232	0.0014442	0.00164971	0.00252846	0.00137274	0.00219351
			CII	0.00600519	0.00448611	0.00100061	0.00372984	0.00383964	0.00290848	0.00111582	0.0040296	0.00266507	0.00312603													CII	0.00320585	0.00412573	0.00468762	0.00312981	0.00805281	0.00447642	0.00684119	0.0079059	0.00673918	0.00718581
			CIV	0.00554726	0.00630775	0.00108385	0.00422663	0.00498971	0.00364073	0.00110625	0.00468672	0.00519991	0.00612392													CIV	0.00450415	0.00422825	0.00491895	0.004171	0.00831382	0.00468749	0.00684807	0.0110102	0.00938774	0.0103577
	MTDR (Mito. Content, RFU)/well:			YMGW1	YMGW2	YMGW3	YMGW4	YMGW5	YMGW6	YMGW7	YMGW8	YMGW9	YMGW10														YFGW1	YFGW2	YFGW3	YFGW4	YFGW5	YFGW6	YFGW7	YFGW8	YFGW9	YFGW10
			predicted MTDR in seahorse well	33814.9	18766.7	25948.5	37534.7	33359.1	36769.1	33109.3	23170.9	34255.1	22174.9													predicted MTDR in seahorse well	11387.1	14061.7	14698.9	16323.7	17269.9	19721.9	21226.7	17591.5	28347.9	25787.1
[truncated: 74 more columns]

[truncated: 23 more sheets: Young-Hamstring, Young-Heart atrium, Young-Heart ventricle, Young-Hippocampus, Young-Hypothalamus, Young-Ileum, Young-iWAT, Young-Jejunum, Young-Kid-Cortex, Young-Kid-Med, Young-Liver, Young-Lung, Young-MesWAT, Young-Pancreas, Young-Plantaris, Young-Proximal colon, Young-Quad, Young-Skin, Young-Soleus , Young-Spleen …]
